# Supplementary material for: Integrated lipidomics and RNA sequencing analysis reveal novel changes during 3T3-L1 cell adipogenesis
Source: PeerJ journal article supplement (doi:10.7717/peerj.13417), 2022-05-03
Supplement: Figure_s-1120.pdf [file Figure_s-1120.pdf]

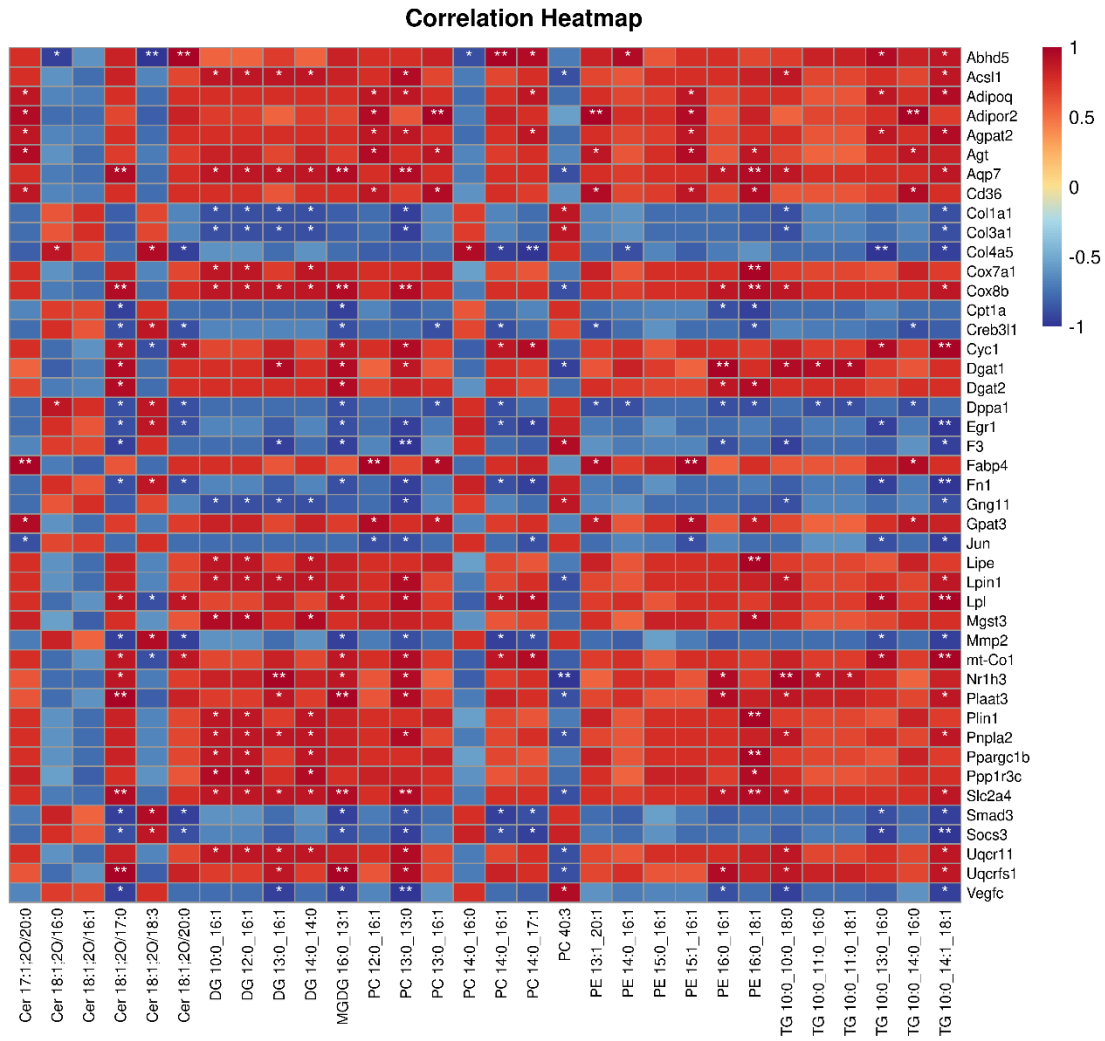

**Figure S2** Heat map of correlation analysis between differentially expressed genes and lipid metabolites

Positive correlations are blue and negative correlations are red. \* $<0.05$ , \*\* $<0.01$ .

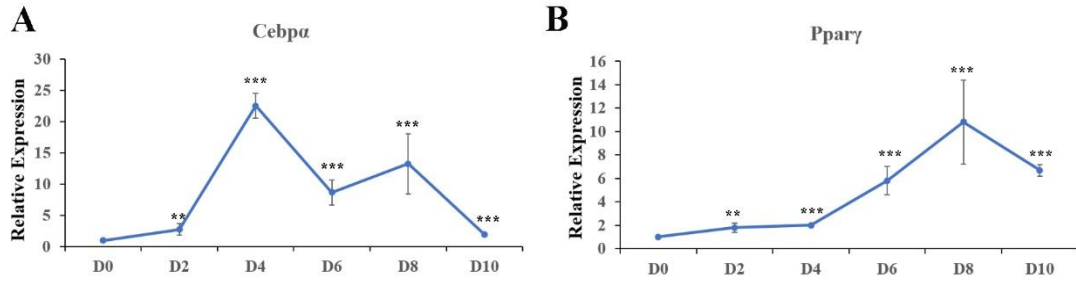

**Figure S3** The expression of *Cebpa* and *Pparg* in adipogenesis detected by RT-qPCR
