# Supplementary material for: Integrated lipidomics and RNA sequencing analysis reveal novel changes during 3T3-L1 cell adipogenesis
Source: PeerJ. 2022 May 3;10:e13417. doi: 10.7717/peerj.13417 (PMC9074861; doi:10.7717/peerj.13417)
Supplement: Supplemental Information 2 [file peerj-10-13417-s002.xlsx]

## Sheet: Table S1
Table S1 The sequence of primers
gene name	Forward sequence	Reverse sequence
18S	GTAACCCGTTGAACCCCATT	CCATCCAATCGGTAGTAGCG
Acadm	TGACAAAAGCGGGGAGTACC	GCACCCCTGTACACCCATAC
acsl1	GACAAATGCCCTGAAAGACCT	GTTCTCTATGCAGAATTCATCTGTG
adipoq	CTCCACCCAAGGGAACTTGT	TAGGACCAAGAAGACCTGCATC
Angptl4	CACCCACTTACACAGGCCG	GAAGTCCACAGAGCCGTTCA
B2m	TGCTATCCAGAAAACCCCTCA	TTTCAATGTGAGGCGGGTGG
C/EBPα	CAAGAACAGCAACGAGTACCG	GTCACTGGTCAACTCCAGCAC
Dgat1	GTAGTGGGCCCAAGGTAGAA	CCTTGCATTACTCAGGATCAGC
Dgat2	GGTACCCCAGGCTGGCTTT	ACCTGTAACCCCAGAACTTGGA
Fabp4	AAATCACCGCAGACGACAGG	TTCATAACACATTCCACCACCA
Fabp5	CATGGCCAAGCCAGACTGTA	GGTGCAGACCGTCTCAGTTT
lipe	AGGGAGGGCCTCAGCG	GCTGTGTGCACCAAACTACG
Lpin1	CTCGTGAATCCTCTTGAACACA	ACCTGTTTCCAATGGGCCTG
lpl	TCGTCATCGAGAGGATCCGA	TGTTTGTCCAGTGTCAGCCA
Lpl	GCGTAGTTCCAGCAGCAAAG	GAGAAATCTCTTCCCGCGTCT
Plin1	CCATGTCCCTATCCGATGCC	GGGAAGCGGCACATAGTGTA
Pnpla2	CCAAGGGGTGCGCTATGT	TTGGGTTGGTTCAGTAGGC
PPARγ	CTCCAAGAATACCAAAGTGCGA	GCCTGATGCTTTATCCCCACA
βactin	AGATCAAGATCATTGCTCCTCCT	ACGCAGCTCAGTAACAGTCC

## Sheet: Table S2
Table 1 LC-MS-based untargeted lipidomics results
mode	all feature	all annotated	MS2	HMDB	KEGG
pos	5335	3187	850	2874	1028
neg	1554	873	378	562	272
pos (positive) and neg (negative).

## Sheet: Table S3
Table S3 Significant differentially expressed lipid metabolites in D10 versus D0 groups
MS2Metabolite	ratio	t.test_p.value	VIP	regulated	MS2class	MS2classname	MS2lipidmaps	MS2hmdb	MS2kegg	MS2pubchem
TG 14:0_14:1_16:1	1099.99	1.03238e-10	2.47326	up	TG	Triacylglycerol	LMGL03012647;LMGL03012665;LMGL03012702;LMGL03012785;LMGL03012815;LMGL03013218;LMGL03013246;LMGL03013272;LMGL03013298;LMGL03013679;LMGL03013707;LMGL03013760;LMGL03014140;LMGL03014572	-	C00422	56936448;56936464;56936500;56936581;56936609;56937008;56937036;56937062;56937088;56937469;56937497;56937550;56937930;56938361
TG 8:0_16:0_16:1	919.616	8.36638e-10	2.45222	up	TG	Triacylglycerol	LMGL03012633;LMGL03012692;LMGL03013180;LMGL03013208	-	C00422	56936435;56936490;56936970;56936998
TG 14:0_15:0_16:1	778.625	1.56198e-13	2.40301	up	TG	Triacylglycerol	LMGL03012707;LMGL03012759;LMGL03012871;LMGL03013195;LMGL03013223;LMGL03013251;LMGL03013274;LMGL03013300;LMGL03013324;LMGL03013347;LMGL03013681;LMGL03013709;LMGL03013735;LMGL03013761;LMGL03013786;LMGL03014141;LMGL03014168;LMGL03014194;LMGL03014573	-	C00422	56936505;56936556;56936665;56936985;56937013;56937041;56937064;56937090;56937114;56937137;56937471;56937499;56937525;56937551;56937576;56937931;56937958;56937984;56938362
TG 14:0_16:1_16:1	700.962	3.57681e-05	2.42613	up	TG	Triacylglycerol	LMGL03012654;LMGL03012667;LMGL03012710;LMGL03012763;LMGL03012787;LMGL03012820;LMGL03012927;LMGL03013226;LMGL03013254;LMGL03013307;LMGL03013327;LMGL03013351;LMGL03013373;LMGL03013716;LMGL03013739;LMGL03013765;LMGL03013789;LMGL03013813;LMGL03014145;LMGL03014171;LMGL03014197;LMGL03014576;LMGL03014602;LMGL03014627;LMGL03014979	-	C00422	56936455;56936466;56936508;56936559;56936582;56936614;56936719;56937016;56937044;56937097;56937117;56937141;56937163;56937506;56937529;56937555;56937579;56937603;56937935;56937961;56937987;56938365;56938391;56938416;56938768
TG 14:1_16:1_16:1	606.393	1.39024e-08	2.36593	up	TG	Triacylglycerol	LMGL03012655;LMGL03012711;LMGL03012764;LMGL03012765;LMGL03012821;LMGL03012845;LMGL03012928;LMGL03013227;LMGL03013255;LMGL03013328;LMGL03013329;LMGL03013352;LMGL03013396;LMGL03013740;LMGL03013741;LMGL03013766;LMGL03013814;LMGL03014146;LMGL03014198;LMGL03014577;LMGL03014603	-	C00422	56936456;56936509;56936560;56936561;56936615;56936639;56936720;56937017;56937045;56937118;56937119;56937142;56937186;56937530;56937531;56937556;56937604;56937936;56937988;56938366;56938392
TG 16:0_16:1_16:2	439.382	3.56761e-06	2.32263	up	TG	Triacylglycerol	LMGL03010020;LMGL03012718;LMGL03012772;LMGL03012829;LMGL03012847;LMGL03012880;LMGL03012881;LMGL03012933;LMGL03013234;LMGL03013262;LMGL03013336;LMGL03013360;LMGL03013426;LMGL03013443;LMGL03013444;LMGL03013462;LMGL03013748;LMGL03013774;LMGL03013842;LMGL03013843;LMGL03013864;LMGL03013885;LMGL03014154;LMGL03014228;LMGL03014229;LMGL03014252;LMGL03014296;LMGL03014612;LMGL03014633;LMGL03014657;LMGL03014…	HMDB05432	C00422	56936516;56936568;56936623;56936641;56936674;56936675;56936725;56937024;56937052;56937126;56937150;56937216;56937233;56937234;56937252;56937538;56937564;56937632;56937633;56937654;56937675;56937944;56938017;56938018;56938041;56938085;56938401;56938422;56938446;56938468;56938774;56938819;56939141;56939165;9543989
TG 10:0_16:0_16:1	364.977	3.26337e-05	2.45687	up	TG	Triacylglycerol	LMGL03012638;LMGL03012696;LMGL03012753;LMGL03013184;LMGL03013212;LMGL03013240;LMGL03013267;LMGL03013674;LMGL03013702	-	C00422	56936439;56936494;56936551;56936974;56937002;56937030;56937057;56937464;56937492
TG 14:1_16:1_17:1	301.461	8.24023e-11	2.25338	up	TG	Triacylglycerol	LMGL03012827;LMGL03012930;LMGL03012955;LMGL03013204;LMGL03013284;LMGL03013310;LMGL03013377;LMGL03013378;LMGL03013399;LMGL03013420;LMGL03013691;LMGL03013719;LMGL03013793;LMGL03013794;LMGL03013817;LMGL03013861;LMGL03014175;LMGL03014176;LMGL03014201;LMGL03014249;LMGL03014580;LMGL03014606;LMGL03014630;LMGL03014654;LMGL03014982	-	C00422	56936621;56936722;56936747;56936994;56937074;56937100;56937167;56937168;56937189;56937210;56937481;56937509;56937583;56937584;56937607;56937651;56937965;56937966;56937991;56938038;56938369;56938395;56938419;56938443;56938771
TG 15:0_16:0_16:1	260.848	0.000526315	2.25966	up	TG	Triacylglycerol	LMGL03012768;LMGL03012875;LMGL03012954;LMGL03013202;LMGL03013259;LMGL03013282;LMGL03013308;LMGL03013332;LMGL03013356;LMGL03013375;LMGL03013397;LMGL03013689;LMGL03013717;LMGL03013744;LMGL03013770;LMGL03013791;LMGL03013815;LMGL03013837;LMGL03014150;LMGL03014173;LMGL03014199;LMGL03014223;LMGL03014247;LMGL03014578;LMGL03014628;LMGL03014980;LMGL03015005	-	C00422	56936564;56936669;56936746;56936992;56937049;56937072;56937098;56937122;56937146;56937165;56937187;56937479;56937507;56937534;56937560;56937581;56937605;56937627;56937940;56937963;56937989;56938013;56938036;56938367;56938417;56938769;56938794
TG 16:1_16:1_17:1	257.263	1.65658e-11	2.20373	up	TG	Triacylglycerol	LMGL03010029;LMGL03010030;LMGL03012939;LMGL03012957;LMGL03013291;LMGL03013317;LMGL03013385;LMGL03013407;LMGL03013428;LMGL03013486;LMGL03013503;LMGL03013520;LMGL03013698;LMGL03013726;LMGL03013801;LMGL03013825;LMGL03013891;LMGL03013908;LMGL03013909;LMGL03013927;LMGL03014183;LMGL03014209;LMGL03014277;LMGL03014278;LMGL03014299;LMGL03014320;LMGL03014588;LMGL03014614;LMGL03014663;LMGL03014682;LMGL03014…	-	C00422	56936731;56936749;56937081;56937107;56937175;56937197;56937218;56937276;56937293;56937310;56937488;56937516;56937591;56937615;56937681;56937698;56937699;56937717;56937973;56937999;56938066;56938067;56938088;56938109;56938377;56938403;56938452;56938471;56938493;56938514;56938801;56938802;56938822;56938866;56939144;56939168;56939190;9543998;9543999
TG 10:0_16:1_16:1	184.945	1.10731e-07	2.14498	up	TG	Triacylglycerol	LMGL03012639;LMGL03012663;LMGL03012783;LMGL03013185;LMGL03013241;LMGL03013703	-	C00422	56936440;56936463;56936579;56936975;56937031;56937493
TG 10:0_14:0_16:0	165.574	3.16536e-10	2.11111	up	TG	Triacylglycerol	LMGL03012632;LMGL03012660;LMGL03012691;LMGL03013179	-	C00422	14818609;5127847;56936489;56936969
PE 16:1_16:1	155.048	2.98241e-11	2.12752	up	PE	Phosphatidylethanolamine	LMGP02010108;LMGP02010354;LMGP02010356;LMGP02010373;LMGP02010433;LMGP02010457;LMGP02010483;LMGP02010566;LMGP02010595;LMGP02010637;LMGP02010655;LMGP02010871;LMGP02011246	HMDB08957	C00350	42607452;42607454;52924080;52924138;52924161;52924186;52924267;52924296;52924338;52924356;52924572;52924943;9546809
TG 16:0_16:1_17:1	145.81	0.000234486	2.13207	up	TG	Triacylglycerol	LMGL03010024;LMGL03010025;LMGL03010026;LMGL03012732;LMGL03012834;LMGL03012903;LMGL03012938;LMGL03013290;LMGL03013316;LMGL03013384;LMGL03013406;LMGL03013427;LMGL03013467;LMGL03013485;LMGL03013697;LMGL03013725;LMGL03013800;LMGL03013824;LMGL03013869;LMGL03013890;LMGL03013907;LMGL03014182;LMGL03014208;LMGL03014257;LMGL03014276;LMGL03014298;LMGL03014319;LMGL03014587;LMGL03014613;LMGL03014638;LMGL03014…	-	C00422	56936530;56936628;56936697;56936730;56937080;56937106;56937174;56937196;56937217;56937257;56937275;56937487;56937515;56937590;56937614;56937659;56937680;56937697;56937972;56937998;56938046;56938065;56938087;56938108;56938376;56938402;56938427;56938451;56938470;56938492;56938779;56938800;56938821;56938843;56939143;56939167;56939189;9543993;9543994;9543995
TG 11:0_14:0_16:0	138.361	2.40951e-09	2.07876	up	TG	Triacylglycerol	LMGL03012634;LMGL03012693;LMGL03012722;LMGL03013181;LMGL03013209	-	C00422	56936436;56936491;56936520;56936971;56936999
TG 14:0_16:0_17:0	108.137	6.87316e-06	2.0217	up	TG	Triacylglycerol	LMGL03012714;LMGL03012728;LMGL03012767;LMGL03012874;LMGL03012900;LMGL03013201;LMGL03013230;LMGL03013281;LMGL03013331;LMGL03013374;LMGL03013688;LMGL03013743;LMGL03013790;LMGL03014172;LMGL03014222	-	C00422	56936512;56936526;56936563;56936668;56936694;56936991;56937020;56937071;56937121;56937164;56937478;56937533;56937580;56937962;56938012
DG 16:0_17:1	101.99	7.7308e-09	2.04242	up	DG	Diacylglycerol	LMGL02010013;LMGL02010014;LMGL02010365;LMGL02010411;LMGL02010432;LMGL02010455	-	C00641	14275367;56936332;56936355;56936371;9543681;9543682
TG 12:0_16:0_16:1	90.5473	0.000198132	2.21668	up	TG	Triacylglycerol	LMGL03012646;LMGL03012701;LMGL03012757;LMGL03012842;LMGL03013193;LMGL03013217;LMGL03013245;LMGL03013271;LMGL03013297;LMGL03013322;LMGL03013678;LMGL03013706;LMGL03013733;LMGL03013759;LMGL03014139;LMGL03014166	-	C00422	56936447;56936499;56936554;56936636;56936983;56937007;56937035;56937061;56937087;56937112;56937468;56937496;56937523;56937549;56937929;56937956
TG 12:0_14:0_16:0	88.8595	1.54992e-05	1.96953	up	TG	Triacylglycerol	LMGL03012616;LMGL03012637;LMGL03012662;LMGL03012695;LMGL03013183;LMGL03013211;LMGL03013673	-	C00422	11148;184975;56936462;56936493;56936973;56937001;56937463
TG 15:0_16:1_16:1	81.7092	0.000267085	2.23908	up	TG	Triacylglycerol	LMGL03012729;LMGL03012826;LMGL03012876;LMGL03012901;LMGL03012929;LMGL03013203;LMGL03013283;LMGL03013309;LMGL03013357;LMGL03013376;LMGL03013398;LMGL03013419;LMGL03013690;LMGL03013718;LMGL03013771;LMGL03013792;LMGL03013816;LMGL03013838;LMGL03014151;LMGL03014174;LMGL03014200;LMGL03014224;LMGL03014248;LMGL03014579;LMGL03014605;LMGL03014629;LMGL03014653;LMGL03014981;LMGL03015356	-	C00422	56936527;56936620;56936670;56936695;56936721;56936993;56937073;56937099;56937147;56937166;56937188;56937209;56937480;56937508;56937561;56937582;56937606;56937628;56937941;56937964;56937990;56938014;56938037;56938368;56938394;56938418;56938442;56938770;56939138
DG 15:0_16:0	79.1014	8.75907e-09	1.98023	up	DG	Diacylglycerol	LMGL02010339;LMGL02010359;LMGL02010380;LMGL02010426	-	C00641	14275229;56936307;56936326;56936345
PE 16:1_20:5	73.1334	2.30309e-08	2.0151	up	PE	Phosphatidylethanolamine	LMGP02010533;LMGP02010666;LMGP02010693;LMGP02010694;LMGP02010722;LMGP02010751;LMGP02010969;LMGP02011134;LMGP02011189;LMGP02011239	-	C00350	52924236;52924367;52924394;52924395;52924423;52924452;52924670;52924835;52924890;52924936
LDGCC 18:4	69.3616	3.55424e-08	2.01151	up	LDGCC	Lysodiacylglyceryl-3-O-carboxyhydroxymethylcholine	-	-	-	-
TG 13:0_14:0_16:1	67.1758	1.21219e-09	1.89557	up	TG	Triacylglycerol	LMGL03012644;LMGL03012698;LMGL03012755;LMGL03013187;LMGL03013214;LMGL03013242;LMGL03013269;LMGL03013295;LMGL03013676;LMGL03013704;LMGL03013731;LMGL03014137	-	C00422	56936445;56936496;56936553;56936977;56937004;56937032;56937059;56937085;56937466;56937494;56937521;56937927
TG 14:0_16:0_16:1	67.0934	0.00174251	1.9712	up	TG	Triacylglycerol	LMGL03012653;LMGL03012709;LMGL03012762;LMGL03012844;LMGL03012873;LMGL03013225;LMGL03013253;LMGL03013280;LMGL03013306;LMGL03013326;LMGL03013350;LMGL03013372;LMGL03013687;LMGL03013715;LMGL03013738;LMGL03013764;LMGL03013788;LMGL03013812;LMGL03014144;LMGL03014170;LMGL03014196;LMGL03014221;LMGL03014575;LMGL03014978	-	C00422	56936454;56936507;56936558;56936638;56936667;56937015;56937043;56937070;56937096;56937116;56937140;56937162;56937477;56937505;56937528;56937554;56937578;56937602;56937934;56937960;56937986;56938011;56938364;56938767
DG 15:0_16:1	66.8594	4.19608e-07	1.88655	up	DG	Diacylglycerol	LMGL02010360;LMGL02010381;LMGL02010404;LMGL02010427;LMGL02010450	-	C00641	53478003;56936327;56936346;56936352;56936366
TG 14:1_16:0_17:1	66.6821	5.16708e-09	1.87685	up	TG	Triacylglycerol	LMGL03012729;LMGL03012826;LMGL03012876;LMGL03012901;LMGL03012929;LMGL03013203;LMGL03013283;LMGL03013309;LMGL03013357;LMGL03013376;LMGL03013398;LMGL03013419;LMGL03013690;LMGL03013718;LMGL03013771;LMGL03013792;LMGL03013816;LMGL03013838;LMGL03014151;LMGL03014174;LMGL03014200;LMGL03014224;LMGL03014248;LMGL03014579;LMGL03014605;LMGL03014629;LMGL03014653;LMGL03014981;LMGL03015356	-	C00422	56936527;56936620;56936670;56936695;56936721;56936993;56937073;56937099;56937147;56937166;56937188;56937209;56937480;56937508;56937561;56937582;56937606;56937628;56937941;56937964;56937990;56938014;56938037;56938368;56938394;56938418;56938442;56938770;56939138
PE-Cer 12:0;2O/21:0;O	66.4757	5.3173e-07	1.9317	up	PE_Cer	Ceramide phosphoethanolamine	-	-	C06062	-
TG 14:1_15:0_16:1	66.0433	2.42559e-09	1.89746	up	TG	Triacylglycerol	LMGL03012727;LMGL03012760;LMGL03012817;LMGL03012899;LMGL03013196;LMGL03013252;LMGL03013275;LMGL03013301;LMGL03013325;LMGL03013348;LMGL03013682;LMGL03013710;LMGL03013736;LMGL03013762;LMGL03014142;LMGL03014195;LMGL03014574;LMGL03014600	-	C00422	56936525;56936557;56936611;56936693;56936986;56937042;56937065;56937091;56937115;56937138;56937472;56937500;56937526;56937552;56937932;56937985;56938363;56938389
LPE 16:1	64.5002	4.2072e-07	1.91338	up	LPE	Lysophosphatidylethanolamine	LMGP02050010;LMGP02050037	HMDB11474	C04438	52925129;53480923
TG 8:0_10:0_16:0	64.3374	5.85232e-09	1.9287	up	TG	Triacylglycerol	-	-	C00422	-
TG 14:0_16:1_18:1	58.6549	0.00283812	1.94175	up	TG	Triacylglycerol	LMGL03010018;LMGL03012670;LMGL03012717;LMGL03012771;LMGL03012789;LMGL03012828;LMGL03012879;LMGL03012932;LMGL03013233;LMGL03013261;LMGL03013335;LMGL03013359;LMGL03013404;LMGL03013425;LMGL03013442;LMGL03013747;LMGL03013773;LMGL03013822;LMGL03013841;LMGL03013863;LMGL03013884;LMGL03014153;LMGL03014206;LMGL03014227;LMGL03014251;LMGL03014273;LMGL03014585;LMGL03014611;LMGL03014632;LMGL03014656;LMGL03014…	HMDB05376	C00422	56936468;56936515;56936567;56936584;56936622;56936673;56936724;56937023;56937051;56937125;56937149;56937194;56937215;56937232;56937537;56937563;56937612;56937631;56937653;56937674;56937943;56937996;56938016;56938040;56938062;56938374;56938400;56938421;56938445;56938467;56938773;56938797;56938818;56939140;56939164;9543987
TG 12:0_14:0_16:1	57.467	1.34009e-07	1.8487	up	TG	Triacylglycerol	LMGL03012638;LMGL03012696;LMGL03012753;LMGL03013184;LMGL03013212;LMGL03013240;LMGL03013267;LMGL03013674;LMGL03013702	-	C00422	56936439;56936494;56936551;56936974;56937002;56937030;56937057;56937464;56937492
DG 12:0_16:1	55.3127	3.29455e-05	1.95574	up	DG	Diacylglycerol	LMGL02010322	-	C00641	56936297
PC O-16:1	50.2881	4.49129e-06	1.9113	up	EtherPC	Ether-linked phosphatidylcholine	-	-	C05212	-
LPC 13:1-SN2	46.6564	4.77938e-08	1.89382	up	LPC	Lysophophatidylcholine	-	-	C04230	-
TG 15:0_16:0_18:1	44.4897	0.00308935	1.87007	up	TG	Triacylglycerol	LMGL03010021;LMGL03010022;LMGL03012884;LMGL03012956;LMGL03013289;LMGL03013315;LMGL03013364;LMGL03013383;LMGL03013405;LMGL03013447;LMGL03013466;LMGL03013696;LMGL03013724;LMGL03013778;LMGL03013799;LMGL03013823;LMGL03013846;LMGL03013868;LMGL03013906;LMGL03014158;LMGL03014181;LMGL03014207;LMGL03014232;LMGL03014256;LMGL03014275;LMGL03014297;LMGL03014586;LMGL03014637;LMGL03014680;LMGL03014989;LMGL03015…	-	C00422	56936678;56936748;56937079;56937105;56937154;56937173;56937195;56937237;56937256;56937486;56937514;56937568;56937589;56937613;56937636;56937658;56937696;56937948;56937971;56937997;56938021;56938045;56938064;56938086;56938375;56938426;56938469;56938778;56938799;56938820;56938842;56939142;9543990;9543991
TG 14:1_16:0_16:1	43.8393	1.1932e-05	1.78996	up	TG	Triacylglycerol	LMGL03012654;LMGL03012667;LMGL03012710;LMGL03012763;LMGL03012787;LMGL03012820;LMGL03012927;LMGL03013226;LMGL03013254;LMGL03013307;LMGL03013327;LMGL03013351;LMGL03013373;LMGL03013716;LMGL03013739;LMGL03013765;LMGL03013789;LMGL03013813;LMGL03014145;LMGL03014171;LMGL03014197;LMGL03014576;LMGL03014602;LMGL03014627;LMGL03014979	-	C00422	56936455;56936466;56936508;56936559;56936582;56936614;56936719;56937016;56937044;56937097;56937117;56937141;56937163;56937506;56937529;56937555;56937579;56937603;56937935;56937961;56937987;56938365;56938391;56938416;56938768
TG 16:0_16:0_17:0	40.7962	0.000144404	1.81838	up	TG	Triacylglycerol	LMGL03010019;LMGL03012731;LMGL03012775;LMGL03012883;LMGL03012902;LMGL03013288;LMGL03013339;LMGL03013382;LMGL03013446;LMGL03013695;LMGL03013751;LMGL03013798;LMGL03013845;LMGL03014180;LMGL03014231;LMGL03014274;LMGL03015009	-	C00422	56936529;56936571;56936677;56936696;56937078;56937129;56937172;56937236;56937485;56937541;56937588;56937635;56937970;56938020;56938063;56938798;9543988
TG 13:0_14:0_16:0	40.4247	8.05452e-09	1.74983	up	TG	Triacylglycerol	LMGL03012643;LMGL03012697;LMGL03012724;LMGL03012754;LMGL03013186;LMGL03013213;LMGL03013268;LMGL03013675	-	C00422	56936444;56936495;56936522;56936552;56936976;56937003;56937058;56937465
PE 15:0_16:1	40.1543	1.01253e-09	1.83757	up	PE	Phosphatidylethanolamine	LMGP02010005;LMGP02010353;LMGP02010355;LMGP02010371;LMGP02010390;LMGP02010410;LMGP02010429;LMGP02010480;LMGP02010507;LMGP02010518;LMGP02010563;LMGP02010636;LMGP02010793;LMGP02011235	-	C00350	42607451;42607453;5283495;52924078;52924096;52924115;52924134;52924183;52924210;52924221;52924264;52924337;52924494;52924932
PE 17:0_16:1	37.5098	3.09461e-15	1.7893	up	PE	Phosphatidylethanolamine	LMGP02010396;LMGP02010414;LMGP02010438;LMGP02010458;LMGP02010485;LMGP02010521;LMGP02010543;LMGP02010567;LMGP02010624;LMGP02010638;LMGP02010769;LMGP02010795;LMGP02010842;LMGP02011226	-	C00350	52924102;52924119;52924143;52924162;52924188;52924224;52924245;52924268;52924325;52924339;52924470;52924496;52924543;52924923
TG O-18:5_16:2_16:2	35.3713	4.01077e-11	1.71766	up	EtherTG	Ether-linked triacylglycerol	-	-	-	-
TG 9:0_14:0_16:0	34.8188	2.00585e-07	1.78683	up	TG	Triacylglycerol	LMGL03012619;LMGL03012630;LMGL03013177	-	C00422	117811;56936433;56936967
PI 16:0_16:1	34.7963	1.06375e-07	1.78778	up	PI	Phosphatidylinositol	LMGP06010027;LMGP06010050;LMGP06010087;LMGP06010111;LMGP06010137;LMGP06010175;LMGP06010196;LMGP06010220;LMGP06010277;LMGP06010449;LMGP06010496;LMGP06010852;LMGP06010881;LMGP06010960	-	C01194	52927480;52927503;52927540;52927564;52927590;52927628;52927649;52927673;52927730;52927902;52927949;52928305;52928334;52928412
TG 14:1_16:1_18:1	34.4918	0.00142829	1.76402	up	TG	Triacylglycerol	LMGL03010020;LMGL03012718;LMGL03012772;LMGL03012829;LMGL03012847;LMGL03012880;LMGL03012881;LMGL03012933;LMGL03013234;LMGL03013262;LMGL03013336;LMGL03013360;LMGL03013426;LMGL03013443;LMGL03013444;LMGL03013462;LMGL03013748;LMGL03013774;LMGL03013842;LMGL03013843;LMGL03013864;LMGL03013885;LMGL03014154;LMGL03014228;LMGL03014229;LMGL03014252;LMGL03014296;LMGL03014612;LMGL03014633;LMGL03014657;LMGL03014…	HMDB05432	C00422	56936516;56936568;56936623;56936641;56936674;56936675;56936725;56937024;56937052;56937126;56937150;56937216;56937233;56937234;56937252;56937538;56937564;56937632;56937633;56937654;56937675;56937944;56938017;56938018;56938041;56938085;56938401;56938422;56938446;56938468;56938774;56938819;56939141;56939165;9543989
DG 16:0_17:0	34.1669	4.63944e-07	1.78826	up	DG	Diacylglycerol	LMGL02010012;LMGL02010346;LMGL02010364;LMGL02010387;LMGL02010431	-	C00641	14275365;56936314;56936331;56936348;9543680
LPC 16:1	34.1342	4.33379e-06	1.81977	up	LPC	Lysophophatidylcholine	LMGP01050021;LMGP01050022	HMDB10383	C04230	24779460;24779461
SL 17:3;O/11:0	33.0213	2.5744e-08	1.77985	up	SL	Sulfonolipid	-	-	-	-
TG O-16:0_16:4_16:4	32.4663	2.91107e-11	1.69792	up	EtherTG	Ether-linked triacylglycerol	-	-	-	-
DG 10:0_16:1	31.6613	9.97804e-07	1.78145	up	DG	Diacylglycerol	-	-	C00641	-
TG 10:0_11:0_18:1	31.135	2.80156e-10	1.73155	up	TG	Triacylglycerol	LMGL03012631;LMGL03013178	-	C00422	56936434;56936968
TG 12:0_14:0_18:1	31.1243	0.000977484	1.72087	up	TG	Triacylglycerol	LMGL03012646;LMGL03012701;LMGL03012757;LMGL03012842;LMGL03013193;LMGL03013217;LMGL03013245;LMGL03013271;LMGL03013297;LMGL03013322;LMGL03013678;LMGL03013706;LMGL03013733;LMGL03013759;LMGL03014139;LMGL03014166	-	C00422	56936447;56936499;56936554;56936636;56936983;56937007;56937035;56937061;56937087;56937112;56937468;56937496;56937523;56937549;56937929;56937956
LPE 16:0	29.2361	1.69161e-08	1.74605	up	LPE	Lysophosphatidylethanolamine	LMGP02050002;LMGP02050036	HMDB11473;HMDB11503	C04438	53480922;9547069
TG 16:1_17:1_18:1	28.7839	0.00129299	1.75288	up	TG	Triacylglycerol	LMGL03010055;LMGL03010057;LMGL03010070;LMGL03010072;LMGL03010073;LMGL03010075;LMGL03010076;LMGL03010077;LMGL03012960;LMGL03012991;LMGL03013392;LMGL03013414;LMGL03013435;LMGL03013511;LMGL03013528;LMGL03013556;LMGL03013569;LMGL03013808;LMGL03013832;LMGL03013916;LMGL03013935;LMGL03013953;LMGL03013970;LMGL03013987;LMGL03014190;LMGL03014216;LMGL03014285;LMGL03014307;LMGL03014328;LMGL03014386;LMGL03014…	-	C00422	53481033;53481036;53481040;56936752;56936783;56937182;56937204;56937225;56937301;56937318;56937346;56937359;56937598;56937622;56937706;56937725;56937743;56937760;56937777;56937980;56938006;56938074;56938096;56938117;56938175;56938192;56938209;56938384;56938410;56938479;56938501;56938522;56938562;56938580;56938830;56938896;56938912;56939152;56939176;56939221;56939242;56939259;56939493;9544023;9544…
TG 8:0_14:0_14:1	28.4486	9.88642e-12	1.66374	up	TG	Triacylglycerol	-	-	C00422	-
DG 16:0_16:1	28.2928	1.59469e-05	1.67487	up	DG	Diacylglycerol	LMGL02010010;LMGL02010341;LMGL02010384;LMGL02010407;LMGL02010429;LMGL02010452	HMDB07099	C00641	14275341;53477977;56936309;56936360;56936368;9543678
LPC 18:0	28.2463	2.07199e-06	1.76664	up	LPC	Lysophophatidylcholine	LMGP01050026;LMGP01050076	HMDB10384;HMDB11128	C04230	24779491;497299
TG 10:0_15:0_16:1	28.2074	5.31805e-08	1.70028	up	TG	Triacylglycerol	LMGL03012635;LMGL03012694;LMGL03013182;LMGL03013210;LMGL03013238;LMGL03013672	-	C00422	56936437;56936492;56936972;56937000;56937028;56937462
LPC 15:0-SN1	27.9361	4.84568e-09	1.7788	up	LPC	Lysophophatidylcholine	LMGP01050016	HMDB10381	C04230	24779458
PE O-9:0_7:0	26.5705	4.13065e-09	1.75171	up	EtherPE	Ether-linked phosphatidylethanolamine	-	-	C04475	-
PC 15:1_16:1	26.3323	2.06835e-08	1.77885	up	PC	Phosphatidylcholine	LMGP01011348;LMGP01011368;LMGP01011387;LMGP01011438;LMGP01011478;LMGP01011524;LMGP01011553;LMGP01011615	-	C00157	52922178;52922218;52922256;52922358;52922438;52922527;52922585;52922709
LNAPE 16:1/N-17:0	25.652	2.31678e-12	1.71895	up	LNAPE	N-acyl-lysophosphatidylethanolamine	-	-	-	-
DG 16:1_17:1	24.8654	4.08301e-06	1.65449	up	DG	Diacylglycerol	LMGL02010016;LMGL02010017;LMGL02010366;LMGL02010433;LMGL02010456	-	C00641	14275369;56936333;56936372;9543684;9543685
TG 8:0_13:1_16:0	24.2282	9.60632e-08	1.63119	up	TG	Triacylglycerol	-	-	C00422	-
PG 16:1_16:1	23.595	3.10582e-07	1.71675	up	PG	Phosphatidylglycerol	LMGP04010060;LMGP04010120;LMGP04010144;LMGP04010170;LMGP04010253;LMGP04010282;LMGP04010324;LMGP04010342;LMGP04010558;LMGP04010928;LMGP04010967	-	C00344	52926325;52926385;52926409;52926435;52926518;52926547;52926589;52926607;52926823;52927192;52927230
PG 14:0_16:1	23.1444	1.90744e-05	1.68603	up	PG	Phosphatidylglycerol	LMGP04010074;LMGP04010114;LMGP04010142;LMGP04010165;LMGP04010193;LMGP04010203;LMGP04010249;LMGP04010322;LMGP04010930;LMGP04010941	-	C00344	10794767;52926339;52926379;52926407;52926430;52926458;52926468;52926514;52926587;52927194
TG 10:0_14:1_18:1	22.944	1.11586e-07	1.6334	up	TG	Triacylglycerol	LMGL03012639;LMGL03012663;LMGL03012783;LMGL03013185;LMGL03013241;LMGL03013703	-	C00422	56936440;56936463;56936579;56936975;56937031;56937493
LPC 17:0	22.9297	4.11788e-10	1.74107	up	LPC	Lysophophatidylcholine	LMGP01050024	HMDB12108	C04230	24779463
PI 16:1_18:1	22.5985	4.67212e-08	1.68464	up	PI	Phosphatidylinositol	LMGP06010034;LMGP06010071;LMGP06010096;LMGP06010147;LMGP06010200;LMGP06010254;LMGP06010453;LMGP06010499;LMGP06010528;LMGP06010725;LMGP06010847;LMGP06010851;LMGP06010862;LMGP06010873;LMGP06010959	-	C01194	46891796;52927487;52927524;52927549;52927600;52927653;52927707;52927906;52927952;52927981;52928178;52928300;52928304;52928315;52928326
DG 13:0_16:1	21.8342	7.38525e-07	1.6376	up	DG	Diacylglycerol	LMGL02010333;LMGL02010355	-	C00641	56936301;56936323
MGDG 16:0_13:1	21.5341	8.68793e-07	1.67485	up	MGDG	Monogalactosyldiacylglycerol	-	-	C03692	-
LNAPE 16:1/N-16:0	21.0965	1.38341e-11	1.64615	up	LNAPE	N-acyl-lysophosphatidylethanolamine	-	-	-	-
TG 9:0_9:0_18:0	21.0462	8.95573e-05	1.64323	up	TG	Triacylglycerol	LMGL03012618	-	C00422	10851
TG O-16:0_16:0_22:5	20.9662	2.42967e-05	1.54659	up	EtherTG	Ether-linked triacylglycerol	-	-	-	-
PE O-17:1_17:1	20.9443	2.22194e-09	1.67669	up	EtherPE	Ether-linked phosphatidylethanolamine	LMGP02020100	-	C04475	52925035
PE 13:1_20:1	20.7182	7.39517e-07	1.68928	up	PE	Phosphatidylethanolamine	LMGP02010397;LMGP02010439;LMGP02010486;LMGP02010508;LMGP02010522;LMGP02010568;LMGP02010597;LMGP02010639;LMGP02010657;LMGP02010796;LMGP02010872;LMGP02011232	-	C00350	52924103;52924144;52924189;52924211;52924225;52924269;52924298;52924340;52924358;52924497;52924573;52924929
PE 32:2	20.3573	7.18686e-14	1.63212	up	PE	Phosphatidylethanolamine	LMGP02010108;LMGP02010354;LMGP02010356;LMGP02010373;LMGP02010433;LMGP02010457;LMGP02010483;LMGP02010566;LMGP02010595;LMGP02010637;LMGP02010655;LMGP02010871;LMGP02011246	HMDB08957	C00350	42607452;42607454;52924080;52924138;52924161;52924186;52924267;52924296;52924338;52924356;52924572;52924943;9546809
TG 14:0_16:1_22:6	20.3526	7.76222e-06	1.61247	up	TG	Triacylglycerol	LMGL03010196;LMGL03010221;LMGL03010247;LMGL03012952;LMGL03012993;LMGL03013013;LMGL03013481;LMGL03013499;LMGL03013516;LMGL03013533;LMGL03013548;LMGL03013608;LMGL03013617;LMGL03013883;LMGL03013904;LMGL03014271;LMGL03014392;LMGL03014409;LMGL03014426;LMGL03014441;LMGL03014652;LMGL03014676;LMGL03014779;LMGL03014797;LMGL03014814;LMGL03014831;LMGL03014846;LMGL03015004;LMGL03015116;LMGL03015445;LMGL03015…	-	C00422	56936744;56936785;56936805;56937271;56937289;56937306;56937323;56937338;56937398;56937407;56937673;56937694;56938060;56938181;56938198;56938215;56938230;56938441;56938465;56938568;56938586;56938603;56938620;56938635;56938793;56938902;56939227;56939248;56939518;56939535;56939605;56939608;56939763;9544161;9544186;9544212
TG O-8:0_16:1_22:6	20.2395	9.45897e-07	1.58317	up	EtherTG	Ether-linked triacylglycerol	-	-	-	-
PE 16:1_20:4	19.9602	1.94081e-06	1.6689	up	PE	Phosphatidylethanolamine	LMGP02010450;LMGP02010644;LMGP02010664;LMGP02010665;LMGP02010692;LMGP02010721;LMGP02010750;LMGP02010939;LMGP02010968;LMGP02011105;LMGP02011217;LMGP02011221	-	C00350	52924155;52924345;52924365;52924366;52924393;52924422;52924451;52924640;52924669;52924806;52924915;52924919
DG 15:1_16:1	19.631	1.97804e-07	1.62302	up	DG	Diacylglycerol	LMGL02010361;LMGL02010382;LMGL02010405;LMGL02010451	-	C00641	56936328;56936347;56936353;56936367
SM 43:1;3O	19.3842	3.93738e-09	1.62754	up	SM	Sphingomyelin	-	-	C00550	-
TG 16:1_16:1_18:1	19.1337	0.00497386	1.66294	up	TG	Triacylglycerol	LMGL03010037;LMGL03010039;LMGL03010040;LMGL03010052;LMGL03010053;LMGL03010054;LMGL03012779;LMGL03012836;LMGL03012850;LMGL03012888;LMGL03012941;LMGL03012981;LMGL03013343;LMGL03013367;LMGL03013451;LMGL03013470;LMGL03013488;LMGL03013505;LMGL03013522;LMGL03013755;LMGL03013781;LMGL03013850;LMGL03013872;LMGL03013893;LMGL03013951;LMGL03013968;LMGL03013985;LMGL03014161;LMGL03014236;LMGL03014260;LMGL03014…	HMDB05379;HMDB05433;HMDB10417	C00422	25240357;25240358;56936575;56936630;56936644;56936682;56936733;56936773;56937133;56937157;56937241;56937260;56937278;56937295;56937312;56937545;56937571;56937640;56937662;56937683;56937741;56937758;56937775;56937951;56938025;56938049;56938115;56938132;56938133;56938151;56938430;56938454;56938499;56938520;56938537;56938782;56938847;56938848;56938869;56938890;56939174;56939193;56939215;56939236;954…
TG 16:0_17:1_18:1	18.6819	0.00648983	1.64303	up	TG	Triacylglycerol	LMGL03010045;LMGL03010048;LMGL03010058;LMGL03010059;LMGL03010061;LMGL03010062;LMGL03010063;LMGL03010094;LMGL03012738;LMGL03012906;LMGL03012946;LMGL03013391;LMGL03013413;LMGL03013434;LMGL03013493;LMGL03013555;LMGL03013568;LMGL03013807;LMGL03013831;LMGL03013898;LMGL03013915;LMGL03013934;LMGL03013952;LMGL03014189;LMGL03014215;LMGL03014284;LMGL03014306;LMGL03014327;LMGL03014367;LMGL03014385;LMGL03014…	-	C00422	53481032;53481035;53481039;56936536;56936738;56937181;56937203;56937224;56937283;56937345;56937358;56937597;56937621;56937688;56937705;56937724;56937742;56937979;56938005;56938073;56938095;56938116;56938156;56938174;56938383;56938409;56938459;56938478;56938500;56938542;56938561;56938829;56938874;56938895;56939151;56939175;56939198;56939220;56939258;56939491;9544013;9544016;9544026;9544027;9544029…
TG 9:0_9:0_16:1	18.5648	1.02506e-07	1.56454	up	TG	Triacylglycerol	-	-	C00422	-
TG O-8:0_16:3_16:3	18.0033	1.57823e-08	1.55269	up	EtherTG	Ether-linked triacylglycerol	-	-	-	-
PI 34:2	17.9525	9.28376e-06	1.65316	up	PI	Phosphatidylinositol	LMGP06010034;LMGP06010071;LMGP06010096;LMGP06010147;LMGP06010200;LMGP06010254;LMGP06010453;LMGP06010499;LMGP06010528;LMGP06010725;LMGP06010847;LMGP06010851;LMGP06010862;LMGP06010873;LMGP06010959	-	C01194	46891796;52927487;52927524;52927549;52927600;52927653;52927707;52927906;52927952;52927981;52928178;52928300;52928304;52928315;52928326
TG 13:0_17:1_19:1	17.8706	1.29006e-05	1.54243	up	TG	Triacylglycerol	LMGL03010024;LMGL03010025;LMGL03010026;LMGL03012732;LMGL03012834;LMGL03012903;LMGL03012938;LMGL03013290;LMGL03013316;LMGL03013384;LMGL03013406;LMGL03013427;LMGL03013467;LMGL03013485;LMGL03013697;LMGL03013725;LMGL03013800;LMGL03013824;LMGL03013869;LMGL03013890;LMGL03013907;LMGL03014182;LMGL03014208;LMGL03014257;LMGL03014276;LMGL03014298;LMGL03014319;LMGL03014587;LMGL03014613;LMGL03014638;LMGL03014…	-	C00422	56936530;56936628;56936697;56936730;56937080;56937106;56937174;56937196;56937217;56937257;56937275;56937487;56937515;56937590;56937614;56937659;56937680;56937697;56937972;56937998;56938046;56938065;56938087;56938108;56938376;56938402;56938427;56938451;56938470;56938492;56938779;56938800;56938821;56938843;56939143;56939167;56939189;9543993;9543994;9543995
DG 17:0_18:1	17.615	2.5704e-07	1.63039	up	DG	Diacylglycerol	LMGL02010029;LMGL02010030;LMGL02010041;LMGL02010372;LMGL02010418;LMGL02010437;LMGL02010460;LMGL02010522	-	C00641	53478008;56936339;56936356;56936376;56936404;9543697;9543698;9543709
DG 14:0_16:1	17.5486	1.22768e-05	1.59286	up	DG	Diacylglycerol	LMGL02010336;LMGL02010357;LMGL02010379;LMGL02010402	-	C00641	53477950;53477975;56936304;56936324
PE 16:0_16:1	17.2335	8.09166e-11	1.58476	up	PE	Phosphatidylethanolamine	LMGP02010372;LMGP02010395;LMGP02010432;LMGP02010456;LMGP02010482;LMGP02010520;LMGP02010541;LMGP02010565;LMGP02010622;LMGP02010794;LMGP02010841;LMGP02011199;LMGP02011228;LMGP02011247	-	C00350	52924079;52924101;52924137;52924160;52924185;52924223;52924244;52924266;52924323;52924495;52924542;52924900;52924925;52924944
LPE 17:0	17.0986	1.77401e-09	1.64093	up	LPE	Lysophosphatidylethanolamine	LMGP02050030	-	C04438	52925149
LPC 16:0	17.0333	6.74727e-09	1.60039	up	LPC	Lysophophatidylcholine	LMGP01050018;LMGP01050074;LMGP01050113	-	C04230	15061532;460602;86554
DG 16:1_16:1	16.7734	1.73455e-06	1.51346	up	DG	Diacylglycerol	LMGL02010011;LMGL02010342;LMGL02010385;LMGL02010408;LMGL02010430;LMGL02010453	HMDB07128	C00641	14275352;53477979;56936310;56936361;56936369;9543679
LPC 17:1-SN1	16.7284	6.38299e-08	1.64886	up	LPC	Lysophophatidylcholine	LMGP01050002;LMGP01050126	-	C04230	24779451;42607442
PC 14:0_17:1	16.7085	5.66383e-05	1.6306	up	PC	Phosphatidylcholine	LMGP01010002;LMGP01010008;LMGP01010535;LMGP01011328;LMGP01011347;LMGP01011367;LMGP01011386;LMGP01011437;LMGP01011464;LMGP01011477;LMGP01011523;LMGP01011596;LMGP01011756	HMDB07936	C00157	24778517;24778520;24778657;52922138;52922176;52922216;52922254;52922356;52922410;52922436;52922525;52922671;52922991
SM 43:2;3O	16.6198	1.00882e-09	1.58129	up	SM	Sphingomyelin	-	-	C00550	-
Cer 18:1;2O/23:0	16.4186	4.30573e-05	1.63879	up	Cer_NS	Ceramide non-hydroxyfatty acid-sphingosine	LMSP02010021	-	C00195	52931115
TG O-16:0_10:0_16:0	16.3499	2.3353e-08	1.54664	up	EtherTG	Ether-linked triacylglycerol	-	-	-	-
LPC 16:0-SN1	16.0229	2.92438e-06	1.61962	up	LPC	Lysophophatidylcholine	LMGP01050018;LMGP01050074;LMGP01050113	-	C04230	15061532;460602;86554
LPG 16:0	15.5365	1.43887e-07	1.55648	up	LPG	Lysophosphatidylglycerol	LMGP04050008	-	-	42607483
PC 16:1_20:5	15.3398	6.50977e-07	1.62484	up	PC	Phosphatidylcholine	LMGP01010512;LMGP01010952;LMGP01010954;LMGP01010956;LMGP01010960;LMGP01011492;LMGP01011627;LMGP01011654;LMGP01011655;LMGP01011684;LMGP01011713;LMGP01011933;LMGP01012099;LMGP01012134;LMGP01012135;LMGP01012233;LMGP01012235	HMDB07892;HMDB08206	C00157	24778639;24778987;24778988;24778990;24778993;52922465;52922733;52922787;52922789;52922847;52922905;52923343;52923675;53478631;53478633;53479277;53479343
PG 16:0_16:1	15.0136	3.33598e-06	1.58387	up	PG	Phosphatidylglycerol	LMGP04010059;LMGP04010082;LMGP04010119;LMGP04010143;LMGP04010169;LMGP04010207;LMGP04010228;LMGP04010252;LMGP04010309;LMGP04010481;LMGP04010528;LMGP04010882;LMGP04010910;LMGP04010984	-	C00344	52926324;52926347;52926384;52926408;52926434;52926472;52926493;52926517;52926574;52926746;52926793;52927147;52927174;52927247
PI 16:1_16:1	14.958	4.12695e-06	1.55781	up	PI	Phosphatidylinositol	LMGP06010028;LMGP06010088;LMGP06010112;LMGP06010138;LMGP06010221;LMGP06010250;LMGP06010292;LMGP06010310;LMGP06010526;LMGP06010899;LMGP06010938	-	C01194	52927481;52927541;52927565;52927591;52927674;52927703;52927745;52927763;52927979;52928352;52928391
TG 10:0_11:0_16:0	14.8193	4.09171e-07	1.51661	up	TG	Triacylglycerol	LMGL03012627	-	C00422	9831001
MGDG O-16:0_22:2	14.7272	3.11836e-06	1.46886	up	EtherMGDG	Ether-linked monogalactosyldiacylglycerol	-	-	-	-
SHexCer 31:0;3O	14.6128	1.0193e-09	1.51731	up	SHexCer	Sulfatide	-	-	C06125	-
DG 16:0_16:0	14.5672	5.1871e-09	1.54013	up	DG	Diacylglycerol	LMGL02010001;LMGL02010009;LMGL02010340;LMGL02010363;LMGL02010383;LMGL02010428	HMDB07098	C00641	53477951;56936308;56936330;56936359;644078;99931
TG 9:0_9:0_16:0	14.4642	6.56924e-10	1.47005	up	TG	Triacylglycerol	-	-	C00422	-
Cer 18:0;2O/24:0	14.4411	3.56744e-08	1.59959	up	Cer_NDS	Ceramide non-hydroxyfatty acid-dihydrosphingosine	LMSP02020012;LMSP02020026	HMDB11768	C12126	5283577;70678884
TG O-18:0_16:4_16:4	14.1342	1.57513e-07	1.4479	up	EtherTG	Ether-linked triacylglycerol	-	-	-	-
PE O-16:2_16:1	13.999	6.766e-08	1.57139	up	EtherPE	Ether-linked phosphatidylethanolamine	-	-	C04475	-
TG 9:0_16:1_18:1	13.3661	1.91542e-08	1.49931	up	TG	Triacylglycerol	LMGL03012699;LMGL03012725;LMGL03012813;LMGL03013188;LMGL03013215;LMGL03013243;LMGL03013296;LMGL03013705;LMGL03014138	-	C00422	56936497;56936523;56936607;56936978;56937005;56937033;56937086;56937495;56937928
DG 16:0_18:1	13.1678	1.43165e-09	1.52598	up	DG	Diacylglycerol	LMGL02010004;LMGL02010005;LMGL02010006;LMGL02010018;LMGL02010023;LMGL02010307;LMGL02010348;LMGL02010389;LMGL02010412;LMGL02010459	HMDB07101;HMDB07102;HMDB07129;HMDB07214	C00641	5282283;5283470;5283471;53477956;53477984;56936316;56936375;9543686;9543691;9543972
LPC O-18:2	13.1215	1.89446e-09	1.58968	up	EtherLPC	Ether-linked lysophosphatidylcholine	-	-	C04317	-
PI 16:0_17:1	13.0283	4.30482e-06	1.53113	up	PI	Phosphatidylinositol	LMGP06010051;LMGP06010069;LMGP06010093;LMGP06010113;LMGP06010140;LMGP06010176;LMGP06010198;LMGP06010222;LMGP06010279;LMGP06010293;LMGP06010424;LMGP06010450;LMGP06010497;LMGP06010879	-	C01194	52927504;52927522;52927546;52927566;52927593;52927629;52927651;52927675;52927732;52927746;52927877;52927903;52927950;52928332
NAGly 17:0/20:2	12.7407	3.36345e-06	1.5025	up	NAGly	N-acyl glycine	-	-	C02055	-
TG 14:1_15:1_16:1	12.7114	0.000283388	1.60958	up	TG	Triacylglycerol	LMGL03012622;LMGL03012818;LMGL03013197;LMGL03013276;LMGL03013277;LMGL03013302;LMGL03013349;LMGL03013683;LMGL03013684;LMGL03013711;LMGL03013763;LMGL03014143;LMGL03014601	-	C00422	56936428;56936612;56936987;56937066;56937067;56937092;56937139;56937473;56937474;56937501;56937553;56937933;56938390
LNAPE 20:5/N-18:1	12.6739	8.83356e-09	1.51043	up	LNAPE	N-acyl-lysophosphatidylethanolamine	-	-	-	-
DG 14:0_16:0	12.6483	1.68167e-06	1.49035	up	DG	Diacylglycerol	LMGL02010326;LMGL02010335;LMGL02010356;LMGL02010378	-	C00641	13734178;18642216;5288550;56936303
DG 14:0_15:0	12.607	1.2012e-05	1.46025	up	DG	Diacylglycerol	LMGL02010332;LMGL02010354	-	C00641	56936322;657009
PI 32:1	12.3487	4.96037e-08	1.52872	up	PI	Phosphatidylinositol	LMGP06010027;LMGP06010050;LMGP06010087;LMGP06010111;LMGP06010137;LMGP06010175;LMGP06010196;LMGP06010220;LMGP06010277;LMGP06010449;LMGP06010496;LMGP06010852;LMGP06010881;LMGP06010960	-	C01194	52927480;52927503;52927540;52927564;52927590;52927628;52927649;52927673;52927730;52927902;52927949;52928305;52928334;52928412
LPE 18:0	12.1389	7.09434e-08	1.52382	up	LPE	Lysophosphatidylethanolamine	LMGP02050001;LMGP02050038	HMDB11129;HMDB11130	C04438	53480667;9547068
PC 16:1_17:1	12.0673	4.19527e-09	1.50696	up	PC	Phosphatidylcholine	LMGP01010543;LMGP01011354;LMGP01011396;LMGP01011443;LMGP01011465;LMGP01011481;LMGP01011528;LMGP01011557;LMGP01011599;LMGP01011618;LMGP01011759;LMGP01011836	HMDB07940	C00157	24778664;52922190;52922274;52922368;52922412;52922444;52922535;52922593;52922677;52922715;52922997;52923151
PE O-13:0_5:0	11.9501	4.72089e-06	1.54408	up	EtherPE	Ether-linked phosphatidylethanolamine	-	-	C04475	-
PG O-18:5_20:5	11.8813	5.91946e-10	1.48973	up	EtherPG	Ether-linked phosphatidylglycerol	-	-	-	-
TG O-8:0_18:1_22:6	11.6984	9.48581e-09	1.39414	up	EtherTG	Ether-linked triacylglycerol	-	-	-	-
TG 16:0_17:0_18:1	11.5116	0.00709573	1.48866	up	TG	Triacylglycerol	LMGL03010038;LMGL03010049;LMGL03010050;LMGL03010051;LMGL03010079;LMGL03012959;LMGL03012983;LMGL03013390;LMGL03013412;LMGL03013474;LMGL03013554;LMGL03013567;LMGL03013806;LMGL03013830;LMGL03013876;LMGL03013914;LMGL03013933;LMGL03014017;LMGL03014188;LMGL03014214;LMGL03014264;LMGL03014283;LMGL03014305;LMGL03014347;LMGL03014366;LMGL03014593;LMGL03014645;LMGL03014688;LMGL03014752;LMGL03014997;LMGL03015…	-	C00422	56936751;56936775;56937180;56937202;56937264;56937344;56937357;56937596;56937620;56937666;56937704;56937723;56937807;56937978;56938004;56938053;56938072;56938094;56938136;56938155;56938382;56938434;56938477;56938541;56938786;56938807;56938828;56938851;56938873;56938911;56939150;56939197;9544006;9544017;9544018;9544019;9544046
PC 14:1_16:1	11.5064	5.46718e-05	1.4972	up	PC	Phosphatidylcholine	LMGP01011323;LMGP01011345;LMGP01011385;LMGP01011436;LMGP01011476;LMGP01011552;LMGP01011614	-	C00157	52922128;52922172;52922252;52922354;52922434;52922583;52922707
NAGly 13:0/19:0	11.1275	1.15774e-05	1.42079	up	NAGly	N-acyl glycine	-	-	C02055	-
PC 13:0_16:1	11.0937	2.42395e-06	1.52562	up	PC	Phosphatidylcholine	LMGP01010735;LMGP01011321;LMGP01011343;LMGP01011365;LMGP01011382;LMGP01011411;LMGP01011433;LMGP01011474;LMGP01011521	-	C00157	24778807;52922124;52922168;52922212;52922246;52922304;52922348;52922430;52922521
TG O-14:0_14:0_16:1	11.0771	0.000184639	1.43018	up	EtherTG	Ether-linked triacylglycerol	-	-	-	-
MGDG O-8:0_28:0	11.0586	0.00703769	1.50001	up	EtherMGDG	Ether-linked monogalactosyldiacylglycerol	-	-	-	-
PE O-14:0_3:0	10.9824	1.05516e-08	1.53044	up	EtherPE	Ether-linked phosphatidylethanolamine	-	-	C04475	-
PE 14:0_16:1	10.9739	8.99027e-07	1.48922	up	PE	Phosphatidylethanolamine	LMGP02010387;LMGP02010427;LMGP02010455;LMGP02010478;LMGP02010506;LMGP02010516;LMGP02010562;LMGP02010635;LMGP02011249;LMGP02011260	-	C00350	52924093;52924132;52924159;52924181;52924209;52924219;52924263;52924336;52924945;9547934
PE O-16:1_16:1	10.8151	1.21078e-11	1.47264	up	EtherPE	Ether-linked phosphatidylethanolamine	-	-	C04475	-
SMGDG O-18:0_18:1	10.6796	1.47406e-05	1.45837	up	EtherSMGDG	Semino lipid	-	-	-	-
PC 36:6	10.6092	8.49551e-06	1.49864	up	PC	Phosphatidylcholine	LMGP01010512;LMGP01010952;LMGP01010954;LMGP01010956;LMGP01010960;LMGP01011492;LMGP01011627;LMGP01011654;LMGP01011655;LMGP01011684;LMGP01011713;LMGP01011933;LMGP01012099;LMGP01012134;LMGP01012135;LMGP01012233;LMGP01012235	HMDB07892;HMDB08206	C00157	24778639;24778987;24778988;24778990;24778993;52922465;52922733;52922787;52922789;52922847;52922905;52923343;52923675;53478631;53478633;53479277;53479343
LPC 18:0-SN1	10.5098	1.50104e-05	1.4842	up	LPC	Lysophophatidylcholine	LMGP01050026;LMGP01050076	HMDB10384;HMDB11128	C04230	24779491;497299
TG O-14:0_16:4_16:4	10.3184	9.03502e-09	1.40988	up	EtherTG	Ether-linked triacylglycerol	-	-	-	-
SM 41:3;3O	10.2651	0.000220461	1.36119	up	SM	Sphingomyelin	-	-	C00550	-
DG 14:0_14:0	10.173	8.19665e-06	1.41707	up	DG	Diacylglycerol	LMGL02010321;LMGL02010331	-	C00641	10369168;14275223
PI 16:0_18:1	10.08	7.05884e-08	1.45304	up	PI	Phosphatidylinositol	LMGP06010001;LMGP06010033;LMGP06010070;LMGP06010095;LMGP06010117;LMGP06010146;LMGP06010179;LMGP06010199;LMGP06010224;LMGP06010425;LMGP06010452;LMGP06010479;LMGP06010498;LMGP06010694;LMGP06010857;LMGP06010933	HMDB09783	C01194	52927486;52927523;52927548;52927570;52927599;52927632;52927652;52927677;52927878;52927905;52927932;52927951;52928147;52928310;52928386;5771758
PC 15:0_20:5	9.85415	2.69495e-08	1.48689	up	PC	Phosphatidylcholine	LMGP01011425;LMGP01011454;LMGP01011536;LMGP01011564;LMGP01011565;LMGP01011650;LMGP01011681;LMGP01011709;LMGP01011902;LMGP01011930	-	C00157	52922332;52922390;52922551;52922607;52922609;52922779;52922841;52922897;52923281;52923337
TG O-16:0_14:0_16:1	9.71635	0.000629484	1.38863	up	EtherTG	Ether-linked triacylglycerol	-	-	-	-
PI 36:4	9.52775	4.51117e-07	1.45686	up	PI	Phosphatidylinositol	LMGP06010076;LMGP06010187;LMGP06010298;LMGP06010346;LMGP06010404;LMGP06010564;LMGP06010758;LMGP06010828;LMGP06010843;LMGP06010850;LMGP06010856;LMGP06010927;LMGP06010958	-	C01194	52927529;52927640;52927751;52927799;52927857;52928017;52928211;52928281;52928296;52928303;52928309;52928380;52928411
TG O-8:0_18:3_18:4	9.38342	1.85911e-07	1.36677	up	EtherTG	Ether-linked triacylglycerol	-	-	-	-
LPE O-16:1	9.04329	1.29569e-05	1.45817	up	EtherLPE	Ether-linked lysophosphatidylethanolamine	-	-	C05209	-
PI 34:1	9.00219	3.45028e-07	1.43543	up	PI	Phosphatidylinositol	LMGP06010001;LMGP06010033;LMGP06010070;LMGP06010095;LMGP06010117;LMGP06010146;LMGP06010179;LMGP06010199;LMGP06010224;LMGP06010425;LMGP06010452;LMGP06010479;LMGP06010498;LMGP06010694;LMGP06010857;LMGP06010933	HMDB09783	C01194	52927486;52927523;52927548;52927570;52927599;52927632;52927652;52927677;52927878;52927905;52927932;52927951;52928147;52928310;52928386;5771758
TG 14:1_14:1_16:1	8.84734	1.77534e-07	1.3413	up	TG	Triacylglycerol	LMGL03012648;LMGL03012703;LMGL03012704;LMGL03012816;LMGL03012843;LMGL03013219;LMGL03013220;LMGL03013247;LMGL03013299;LMGL03013708	-	C00422	56936449;56936501;56936502;56936610;56936637;56937009;56937010;56937037;56937089;56937498
Cer 18:1;2O/24:0	8.82458	0.00134615	1.46662	up	Cer_NS	Ceramide non-hydroxyfatty acid-sphingosine	LMSP02010012	HMDB04956	C00195	5283571
LPE 17:1	8.75415	4.31763e-06	1.38922	up	LPE	Lysophosphatidylethanolamine	LMGP02050008	-	C04438	42607464
PC 38:7	8.75332	8.25732e-08	1.43326	up	PC	Phosphatidylcholine	LMGP01010696;LMGP01011306;LMGP01011634;LMGP01011663;LMGP01011692;LMGP01011722;LMGP01011882;LMGP01011910;LMGP01011911;LMGP01011938;LMGP01012103	HMDB08023	C00157	24778773;24779265;52922747;52922805;52922863;52922923;52923241;52923297;52923299;52923353;52923683
PG O-18:1_12:0	8.68208	3.38632e-08	1.43017	up	EtherPG	Ether-linked phosphatidylglycerol	LMGP04020004	-	-	52927252
Cer 18:2;2O/22:0	8.54542	4.03542e-07	1.42873	up	Cer_NS	Ceramide non-hydroxyfatty acid-sphingosine	LMSP02010029;LMSP02010067	-	C00195	52931123;70698954
PC 12:0_16:1	8.39871	5.63798e-05	1.39929	up	PC	Phosphatidylcholine	LMGP01010392;LMGP01011319;LMGP01011341;LMGP01011364;LMGP01011381;LMGP01011432;LMGP01011473	-	C00157	24778531;52922120;52922164;52922210;52922244;52922346;52922428
LPC O-16:1	8.39383	2.40702e-06	1.44575	up	EtherLPC	Ether-linked lysophosphatidylcholine	LMGP01060028;LMGP01060029;LMGP01060031	-	C04317	24779503;24779504;24779506
TG 15:0_16:0_18:1	8.39354	2.83471e-05	1.32022	up	TG	Triacylglycerol	LMGL03010021;LMGL03010022;LMGL03012884;LMGL03012956;LMGL03013289;LMGL03013315;LMGL03013364;LMGL03013383;LMGL03013405;LMGL03013447;LMGL03013466;LMGL03013696;LMGL03013724;LMGL03013778;LMGL03013799;LMGL03013823;LMGL03013846;LMGL03013868;LMGL03013906;LMGL03014158;LMGL03014181;LMGL03014207;LMGL03014232;LMGL03014256;LMGL03014275;LMGL03014297;LMGL03014586;LMGL03014637;LMGL03014680;LMGL03014989;LMGL03015…	-	C00422	56936678;56936748;56937079;56937105;56937154;56937173;56937195;56937237;56937256;56937486;56937514;56937568;56937589;56937613;56937636;56937658;56937696;56937948;56937971;56937997;56938021;56938045;56938064;56938086;56938375;56938426;56938469;56938778;56938799;56938820;56938842;56939142;9543990;9543991
LPC 19:0-SN1	8.33156	4.18523e-09	1.44608	up	LPC	Lysophophatidylcholine	LMGP01050041	-	C04230	24779472
LPE O-16:0	8.30419	3.91909e-08	1.41152	up	EtherLPE	Ether-linked lysophosphatidylethanolamine	LMGP02060002	-	C05209	42607466
LPC O-16:0	8.30107	2.84167e-08	1.43574	up	EtherLPC	Ether-linked lysophosphatidylcholine	LMGP01060010	-	C04317	162126
TG 8:0_14:1_16:0	8.23776	1.20283e-05	1.3205	up	TG	Triacylglycerol	LMGL03012629	-	C00422	56936432
LPI 18:0	8.2352	3.2071e-05	1.33576	up	LPI	Lysophosphatidylinositol	LMGP02060007;LMGP06050004	-	-	42607495;46878550
CoQ8	8.17147	6.39627e-07	1.37891	up	CoQ	Coenzyme Q	LMPR02010005	HMDB06709	C00399	5283546
PE O-18:0_18:1	8.16445	1.65728e-06	1.41452	up	EtherPE	Ether-linked phosphatidylethanolamine	LMGP02020032;LMGP02020047;LMGP02020067	-	C04475	52924967;52924982;52925002
PE O-16:0_16:1	8.12055	2.40072e-07	1.4053	up	EtherPE	Ether-linked phosphatidylethanolamine	LMGP02020027;LMGP02020041	-	C04475	52924962;52924976
DG 24:0_18:1	8.10653	0.00274031	1.45097	up	DG	Diacylglycerol	LMGL02010210;LMGL02010211	HMDB07377;HMDB07405	C00641	9543875;9543876
HexCer 38:1;2O/3:0	8.02974	1.49982e-07	1.41589	up	HexCer_NS	Hexosylceramide non-hydroxyfatty acid-sphingosine	LMSP0501AA32;LMSP0501AC17	-	-	52931253;52931280
TG 15:0_16:0_22:6	7.81055	1.87535e-06	1.29327	up	TG	Triacylglycerol	LMGL03010251;LMGL03010253;LMGL03010254;LMGL03010255;LMGL03010276;LMGL03010278;LMGL03010279;LMGL03010281;LMGL03010282;LMGL03012742;LMGL03013001;LMGL03013566;LMGL03013579;LMGL03013926;LMGL03013945;LMGL03013963;LMGL03013980;LMGL03013997;LMGL03014012;LMGL03014062;LMGL03014072;LMGL03014295;LMGL03014317;LMGL03014338;LMGL03014472;LMGL03014700;LMGL03014722;LMGL03014743;LMGL03014864;LMGL03014877;LMGL03015…	-	C00422	56936540;56936793;56937356;56937369;56937716;56937735;56937753;56937770;56937787;56937802;56937852;56937862;56938084;56938106;56938127;56938261;56938489;56938511;56938532;56938653;56938666;56938816;56938840;56938939;56938957;56938974;56938991;56939006;56939162;56939186;56939270;56939289;56939307;56939324;56939341;56939356;56939630;56939692;56939695;56939771;56939774;56939846;56939849;9544215;9544…
DG 16:1_18:1	7.77672	6.63395e-05	1.31703	up	DG	Diacylglycerol	LMGL02010021;LMGL02010022;LMGL02010026;LMGL02010027;LMGL02010349;LMGL02010390;LMGL02010413	HMDB07103;HMDB07131	C00641	53477957;53477985;56936317;9543689;9543690;9543694;9543695
PS 18:0_22:5	7.65076	3.31999e-07	1.368	up	PS	Phosphatidylserine	LMGP03010339;LMGP03010394;LMGP03010422;LMGP03010452;LMGP03010523;LMGP03010550;LMGP03010580;LMGP03010610;LMGP03010639;LMGP03010666;LMGP03010741;LMGP03010770;LMGP03010771;LMGP03010799	-	C02737	52925449;52925504;52925532;52925562;52925633;52925660;52925690;52925720;52925749;52925776;52925851;52925880;52925881;52925909
MGDG O-22:0_16:1	7.62766	3.07148e-06	1.32644	up	EtherMGDG	Ether-linked monogalactosyldiacylglycerol	-	-	-	-
TG 15:0_16:1_22:6	7.54652	8.06579e-07	1.32332	up	TG	Triacylglycerol	LMGL03010289;LMGL03010290;LMGL03010316;LMGL03010318;LMGL03010319;LMGL03013009;LMGL03013580;LMGL03013946;LMGL03013964;LMGL03013981;LMGL03013998;LMGL03014013;LMGL03014073;LMGL03014082;LMGL03014318;LMGL03014339;LMGL03014701;LMGL03014723;LMGL03014744;LMGL03014878;LMGL03015055;LMGL03015176;LMGL03015193;LMGL03015210;LMGL03015225;LMGL03015381;LMGL03015405;LMGL03015508;LMGL03015526;LMGL03015543;LMGL03015…	-	C00422	56936801;56937370;56937736;56937754;56937771;56937788;56937803;56937863;56937872;56938107;56938128;56938490;56938512;56938533;56938667;56938841;56938958;56938975;56938992;56939007;56939163;56939187;56939290;56939308;56939325;56939342;56939357;56939696;56939713;56939775;56939778;56939850;56939853;9544253;9544254;9544280;9544282;9544283
Cer 18:2;2O/24:0	7.51155	2.32801e-05	1.40291	up	Cer_NS	Ceramide non-hydroxyfatty acid-sphingosine	LMSP02010009	HMDB04953	C00195	5283568
PC 17:0_18:0	7.40313	2.80114e-09	1.39386	up	PC	Phosphatidylcholine	LMGP01010401;LMGP01010421;LMGP01010448;LMGP01010709;LMGP01011065;LMGP01011084;LMGP01011358;LMGP01011375;LMGP01011420;LMGP01011466;LMGP01011585;LMGP01011733;LMGP01011788	-	C00157	24778540;24778559;24778583;24778785;24779087;24779103;52922198;52922232;52922322;52922414;52922649;52922945;52923055
PG 16:0_16:0	7.38306	1.29369e-07	1.37492	up	PG	Phosphatidylglycerol	LMGP04010027;LMGP04010867;LMGP04010872;LMGP04010896;LMGP04010916;LMGP04010929;LMGP04010935;LMGP04010940;LMGP04010986	-	C00344	446440;52927132;52927137;52927161;52927180;52927193;52927199;52927204;9547121
DG 14:1_16:1	7.3314	0.00265374	1.29824	up	DG	Diacylglycerol	LMGL02010327;LMGL02010337;LMGL02010358;LMGL02010403	-	C00641	53477976;56936299;56936305;56936325
LPC 14:0-SN1	7.2537	1.28915e-06	1.35869	up	LPC	Lysophophatidylcholine	LMGP01050012;LMGP01050073	HMDB10379	C04230	24779490;460604
TG 9:0_9:0_18:2	7.17248	1.05894e-05	1.2686	up	TG	Triacylglycerol	-	-	C00422	-
SM 14:2;2O/21:0	7.11911	1.24486e-06	1.35055	up	SM	Sphingomyelin	-	-	C00550	-
TG 16:0_16:1_18:4	7.05119	1.85258e-05	1.29537	up	TG	Triacylglycerol	LMGL03010056;LMGL03010078;LMGL03012781;LMGL03012838;LMGL03012851;LMGL03012890;LMGL03012943;LMGL03012989;LMGL03013345;LMGL03013369;LMGL03013453;LMGL03013472;LMGL03013490;LMGL03013507;LMGL03013524;LMGL03013539;LMGL03013757;LMGL03013783;LMGL03013852;LMGL03013874;LMGL03013895;LMGL03014002;LMGL03014163;LMGL03014238;LMGL03014262;LMGL03014365;LMGL03014382;LMGL03014383;LMGL03014643;LMGL03014667;LMGL03014…	-	C00422	56936577;56936632;56936645;56936684;56936735;56936781;56937135;56937159;56937243;56937262;56937280;56937297;56937314;56937329;56937547;56937573;56937642;56937664;56937685;56937792;56937953;56938027;56938051;56938154;56938171;56938172;56938432;56938456;56938540;56938558;56938559;56938784;56938872;56938892;56938893;56939196;56939217;56939218;56939238;56939490;9544024;9544045
TG 10:0_13:0_16:0	6.99917	1.47771e-05	1.28001	up	TG	Triacylglycerol	LMGL03012619;LMGL03012630;LMGL03013177	-	C00422	117811;56936433;56936967
LPC 20:0	6.98475	3.96216e-06	1.38202	up	LPC	Lysophophatidylcholine	LMGP01050045	HMDB10390	C04230	24779473
PI 18:0_18:1	6.86333	1.96368e-05	1.31137	up	PI	Phosphatidylinositol	LMGP06010074;LMGP06010102;LMGP06010154;LMGP06010184;LMGP06010206;LMGP06010232;LMGP06010428;LMGP06010456;LMGP06010482;LMGP06010502;LMGP06010648;LMGP06010671;LMGP06010696;LMGP06010932;LMGP06010941;LMGP06010957	-	C01194	52927527;52927555;52927607;52927637;52927659;52927685;52927881;52927909;52927935;52927955;52928101;52928124;52928149;52928385;52928394;52928410
TG O-8:0_16:3_16:4	6.84196	5.10277e-07	1.24064	up	EtherTG	Ether-linked triacylglycerol	-	-	-	-
LNAPE 16:1/N-15:0	6.82142	5.84435e-07	1.29641	up	LNAPE	N-acyl-lysophosphatidylethanolamine	-	-	-	-
TG 14:0_15:1_16:1	6.79729	6.24406e-06	1.22565	up	TG	Triacylglycerol	LMGL03012727;LMGL03012760;LMGL03012817;LMGL03012899;LMGL03013196;LMGL03013252;LMGL03013275;LMGL03013301;LMGL03013325;LMGL03013348;LMGL03013682;LMGL03013710;LMGL03013736;LMGL03013762;LMGL03014142;LMGL03014195;LMGL03014574;LMGL03014600	-	C00422	56936525;56936557;56936611;56936693;56936986;56937042;56937065;56937091;56937115;56937138;56937472;56937500;56937526;56937552;56937932;56937985;56938363;56938389
LDGCC 36:2	6.65363	0.000272313	1.36405	up	LDGCC	Lysodiacylglyceryl-3-O-carboxyhydroxymethylcholine	-	-	-	-
PI O-17:0_20:5	6.58281	4.16862e-06	1.29346	up	EtherPI	Ether-linked phosphatidylinositol	-	-	-	-
PC 16:1_16:1	6.49711	0.000194648	1.32404	up	PC	Phosphatidylcholine	LMGP01010494;LMGP01010496;LMGP01010682;LMGP01010684;LMGP01011330;LMGP01011390;LMGP01011414;LMGP01011440;LMGP01011526;LMGP01011555;LMGP01011597;LMGP01011616;LMGP01011835	HMDB07874;HMDB08002	C00157	24778622;24778624;24778763;24778764;52922142;52922262;52922310;52922362;52922531;52922589;52922673;52922711;52923149
TG O-12:0_18:2_20:5	6.4609	0.000198606	1.22605	up	EtherTG	Ether-linked triacylglycerol	-	-	-	-
LPC 42:10-SN2	6.37081	1.73854e-06	1.33118	up	LPC	Lysophophatidylcholine	-	-	C04230	-
TG O-20:0_16:3_18:4	6.35795	1.1032e-08	1.27379	up	EtherTG	Ether-linked triacylglycerol	-	-	-	-
SM 34:2;3O	6.32486	7.47825e-06	1.30749	up	SM	Sphingomyelin	-	-	C00550	-
PG 16:0_18:1	6.18433	9.78288e-07	1.29758	up	PG	Phosphatidylglycerol	LMGP04010002;LMGP04010008;LMGP04010065;LMGP04010102;LMGP04010127;LMGP04010149;LMGP04010178;LMGP04010211;LMGP04010231;LMGP04010256;LMGP04010457;LMGP04010484;LMGP04010511;LMGP04010530;LMGP04010725;LMGP04010887;LMGP04010962;LMGP04010987	HMDB10573;HMDB10574	C00344	5283509;5289145;52926330;52926367;52926392;52926414;52926443;52926476;52926496;52926521;52926722;52926749;52926776;52926795;52926990;52927152;52927225;52941750
PI 17:1_18:1	6.14981	1.24064e-05	1.27143	up	PI	Phosphatidylinositol	LMGP06010058;LMGP06010120;LMGP06010149;LMGP06010183;LMGP06010201;LMGP06010227;LMGP06010256;LMGP06010282;LMGP06010296;LMGP06010315;LMGP06010455;LMGP06010501;LMGP06010530;LMGP06010726	-	C01194	52927511;52927573;52927602;52927636;52927654;52927680;52927709;52927735;52927749;52927768;52927908;52927954;52927983;52928179
PC 14:0_16:1	6.04086	0.000180357	1.30842	up	PC	Phosphatidylcholine	LMGP01010440;LMGP01010485;LMGP01011344;LMGP01011384;LMGP01011412;LMGP01011435;LMGP01011463;LMGP01011475;LMGP01011522;LMGP01011595	HMDB07870	C00157	24778575;24778615;52922170;52922250;52922306;52922352;52922408;52922432;52922523;52922669
TG 10:0_15:1_15:1	6.00849	4.36973e-07	1.19053	up	TG	Triacylglycerol	LMGL03012661	-	C00422	56936461
LNAPE 22:5/N-18:1	5.80327	5.52068e-11	1.24854	up	LNAPE	N-acyl-lysophosphatidylethanolamine	-	-	-	-
Cer 18:1;2O/22:0	5.71229	0.000106632	1.28179	up	Cer_NS	Ceramide non-hydroxyfatty acid-sphingosine	LMSP02010008;LMSP02010042;LMSP02010050	HMDB04952	C00195	10627700;5283567;70698933
MGDG O-19:1_22:1	5.69597	1.94672e-07	1.22829	up	EtherMGDG	Ether-linked monogalactosyldiacylglycerol	-	-	-	-
PI 16:0_20:4	5.5673	9.74258e-06	1.2431	up	PI	Phosphatidylinositol	LMGP06010076;LMGP06010187;LMGP06010298;LMGP06010346;LMGP06010404;LMGP06010564;LMGP06010758;LMGP06010828;LMGP06010843;LMGP06010850;LMGP06010856;LMGP06010927;LMGP06010958	-	C01194	52927529;52927640;52927751;52927799;52927857;52928017;52928211;52928281;52928296;52928303;52928309;52928380;52928411
PC O-37:7	5.55039	9.85804e-05	1.22374	up	EtherPC	Ether-linked phosphatidylcholine	-	-	C05212	-
PE 14:0_16:1	5.52603	1.80281e-05	1.22316	up	PE	Phosphatidylethanolamine	LMGP02010387;LMGP02010427;LMGP02010455;LMGP02010478;LMGP02010506;LMGP02010516;LMGP02010562;LMGP02010635;LMGP02011249;LMGP02011260	-	C00350	52924093;52924132;52924159;52924181;52924209;52924219;52924263;52924336;52924945;9547934
PC 18:0_17:1	5.48839	0.000678595	1.24662	up	PC	Phosphatidylcholine	LMGP01010711;LMGP01011359;LMGP01011403;LMGP01011421;LMGP01011450;LMGP01011467;LMGP01011486;LMGP01011531;LMGP01011586;LMGP01011600;LMGP01011734;LMGP01011762;LMGP01011789;LMGP01011809;LMGP01011955;LMGP01012005	-	C00157	24778787;52922200;52922288;52922324;52922382;52922416;52922454;52922541;52922651;52922679;52922947;52923003;52923057;52923097;52923387;52923487
DGCC 11:0_18:5	5.45772	6.39979e-05	1.23628	up	DGCC	Diacylglyceryl-3-O-carboxyhydroxymethylcholine	-	-	-	-
PI 35:2	5.44587	3.87349e-06	1.2507	up	PI	Phosphatidylinositol	LMGP06010058;LMGP06010120;LMGP06010149;LMGP06010183;LMGP06010201;LMGP06010227;LMGP06010256;LMGP06010282;LMGP06010296;LMGP06010315;LMGP06010455;LMGP06010501;LMGP06010530;LMGP06010726	-	C01194	52927511;52927573;52927602;52927636;52927654;52927680;52927709;52927735;52927749;52927768;52927908;52927954;52927983;52928179
TG O-16:1_8:0_8:0	5.43033	1.99059e-07	1.16799	up	EtherTG	Ether-linked triacylglycerol	-	-	-	-
PC 16:1_20:4	5.37832	0.000202226	1.26516	up	PC	Phosphatidylcholine	LMGP01010633;LMGP01010695;LMGP01011305;LMGP01011407;LMGP01011604;LMGP01011625;LMGP01011626;LMGP01011653;LMGP01011683;LMGP01011712;LMGP01011903;LMGP01011932;LMGP01012069;LMGP01012130;LMGP01012131;LMGP01012139;LMGP01012152;LMGP01012182;LMGP01012210;LMGP01012232;LMGP01012234	HMDB07984;HMDB08015	C00157	24778723;24778771;24779264;52922296;52922687;52922729;52922731;52922785;52922845;52922903;52923283;52923341;52923615;53478611;53478613;53478681;53478729;53478855;53479065;53479275;53479341
Cer 18:2;2O/24:1	5.36402	8.11202e-05	1.23247	up	Cer_NS	Ceramide non-hydroxyfatty acid-sphingosine	-	-	C00195	-
NAGly 13:1/21:0	5.35679	0.00018387	1.18507	up	NAGly	N-acyl glycine	-	-	C02055	-
MGDG O-25:0_16:3	5.30518	4.15567e-06	1.18574	up	EtherMGDG	Ether-linked monogalactosyldiacylglycerol	-	-	-	-
PC 13:0_13:0	5.29996	0.000237592	1.23759	up	PC	Phosphatidylcholine	LMGP01010388;LMGP01010432;LMGP01010456;LMGP01010475;LMGP01010725;LMGP01011243	-	C00157	24778527;24778567;24778591;24778609;24778800;24779236
Cer 18:1;2O/20:0	5.29325	7.01166e-05	1.24604	up	Cer_NS	Ceramide non-hydroxyfatty acid-sphingosine	LMSP02010007;LMSP02010016;LMSP02010040	HMDB04951	C00195	10627306;5283566;70698931
PC 17:1_18:2	5.19652	7.41135e-06	1.27081	up	PC	Phosphatidylcholine	LMGP01011423;LMGP01011452;LMGP01011506;LMGP01011507;LMGP01011533;LMGP01011562;LMGP01011602;LMGP01011622;LMGP01011648;LMGP01011679;LMGP01011840;LMGP01011870	-	C00157	10373012;52922328;52922386;52922493;52922545;52922603;52922683;52922723;52922775;52922837;52923159;52923217
TG 15:0_18:0_18:1	5.18576	0.000703203	1.17655	up	TG	Triacylglycerol	LMGL03010038;LMGL03010049;LMGL03010050;LMGL03010051;LMGL03010079;LMGL03012959;LMGL03012983;LMGL03013390;LMGL03013412;LMGL03013474;LMGL03013554;LMGL03013567;LMGL03013806;LMGL03013830;LMGL03013876;LMGL03013914;LMGL03013933;LMGL03014017;LMGL03014188;LMGL03014214;LMGL03014264;LMGL03014283;LMGL03014305;LMGL03014347;LMGL03014366;LMGL03014593;LMGL03014645;LMGL03014688;LMGL03014752;LMGL03014997;LMGL03015…	-	C00422	56936751;56936775;56937180;56937202;56937264;56937344;56937357;56937596;56937620;56937666;56937704;56937723;56937807;56937978;56938004;56938053;56938072;56938094;56938136;56938155;56938382;56938434;56938477;56938541;56938786;56938807;56938828;56938851;56938873;56938911;56939150;56939197;9544006;9544017;9544018;9544019;9544046
PE 36:6	5.18325	2.90085e-06	1.24814	up	PE	Phosphatidylethanolamine	LMGP02010533;LMGP02010666;LMGP02010693;LMGP02010694;LMGP02010722;LMGP02010751;LMGP02010969;LMGP02011134;LMGP02011189;LMGP02011239	-	C00350	52924236;52924367;52924394;52924395;52924423;52924452;52924670;52924835;52924890;52924936
LNAPE 22:6/N-16:1	5.13497	4.7462e-08	1.2584	up	LNAPE	N-acyl-lysophosphatidylethanolamine	-	-	-	-
Cer 18:1;2O/34:5;2O	5.12045	0.000983101	1.27571	up	Cer_EOS	Ceramide Esterified omega-hydroxy fatty acid-sphingosine	-	-	-	-
LPE 18:1	5.11956	3.53032e-05	1.21255	up	LPE	Lysophosphatidylethanolamine	LMGP02050004;LMGP02050039;LMGP02050040;LMGP02050064	HMDB11475;HMDB11476;HMDB11505;HMDB11506	C04438	53480924;53480925;53480949;9547071
TG O-16:0_16:1_16:1	5.04083	0.00626532	1.11953	up	EtherTG	Ether-linked triacylglycerol	-	-	-	-
LPC O-18:1	5.00455	5.95984e-07	1.25883	up	EtherLPC	Ether-linked lysophosphatidylcholine	LMGP01060034;LMGP01060039	-	C04317	21672239;24779510
FAHFA 18:1/18:0	4.99277	5.88437e-06	1.19121	up	FAHFA	Fatty acid ester of hydroxyl fatty acid	-	-	-	-
SM 22:0;2O/19:1	4.98868	0.000432968	1.24855	up	SM	Sphingomyelin	LMSP03010076;LMSP03010077;LMSP03010078	-	C00550	46891684;52931211;52931213
PE O-15:0_16:1	4.97755	4.65286e-07	1.21687	up	EtherPE	Ether-linked phosphatidylethanolamine	LMGP02020026	-	C04475	52924961
PE 16:1_18:2	4.95586	0.00014314	1.22899	up	PE	Phosphatidylethanolamine	LMGP02010041;LMGP02010047;LMGP02010417;LMGP02010442;LMGP02010570;LMGP02010600;LMGP02010659;LMGP02010685;LMGP02010874;LMGP02010904;LMGP02011219;LMGP02011224	HMDB08930;HMDB09154	C00350	52924122;52924147;52924271;52924301;52924360;52924386;52924575;52924605;52924917;52924922;9546746;9546752
TG O-16:4_18:0_18:4	4.88942	2.07611e-05	1.05492	up	EtherTG	Ether-linked triacylglycerol	-	-	-	-
PC 34:1	4.84086	8.16213e-05	1.16533	up	PC	Phosphatidylcholine	LMGP01010005;LMGP01010575;LMGP01010576;LMGP01010578;LMGP01010579;LMGP01010581;LMGP01010744;LMGP01010884;LMGP01011335;LMGP01011372;LMGP01011397;LMGP01011419;LMGP01011448;LMGP01011483;LMGP01011503;LMGP01011529;LMGP01011732;LMGP01011760;LMGP01011787;LMGP01011807;LMGP01012004;LMGP01012146	HMDB07971;HMDB07972;HMDB08035;HMDB08100	C00157	24778687;24778688;24778690;24778691;24778811;24778933;52922152;52922226;52922276;52922320;52922378;52922448;52922487;52922537;52922943;52922999;52923053;52923093;52923485;53478717;5497103;6506401
LPE O-17:1	4.76957	8.58068e-07	1.23077	up	EtherLPE	Ether-linked lysophosphatidylethanolamine	-	-	C05209	-
PE O-15:1_22:6	4.76396	2.40581e-06	1.20983	up	EtherPE	Ether-linked phosphatidylethanolamine	-	-	C04475	-
PE O-28:1_4:0	4.73409	3.22784e-07	1.17771	up	EtherPE	Ether-linked phosphatidylethanolamine	LMGP02020027;LMGP02020041	-	C04475	52924962;52924976
Cer 17:1;2O/20:0	4.70456	7.53092e-06	1.18662	up	Cer_NS	Ceramide non-hydroxyfatty acid-sphingosine	LMSP02010032;LMSP02010044	-	C00195	52931126;70698935
LPE O-16:2	4.62677	3.76167e-08	1.19164	up	EtherLPE	Ether-linked lysophosphatidylethanolamine	-	-	C05209	-
SM 13:2;2O/19:0	4.60541	1.36396e-05	1.19121	up	SM	Sphingomyelin	LMSP03010034	-	C00550	52931131
HexCer 38:2;2O/3:0	4.6008	9.96356e-07	1.20918	up	HexCer_NS	Hexosylceramide non-hydroxyfatty acid-sphingosine	LMSP0501AA38;LMSP0501AC23	-	-	52931259;52931286
LNAPE 16:1/N-18:1	4.59869	1.97628e-07	1.16002	up	LNAPE	N-acyl-lysophosphatidylethanolamine	-	-	-	-
TG 10:0_10:0_18:0	4.57624	0.000831245	1.08442	up	TG	Triacylglycerol	LMGL03012628;LMGL03012659	-	C00422	4589033;56936460
PE 15:1_16:1	4.54912	5.9297e-07	1.2024	up	PE	Phosphatidylethanolamine	LMGP02010391;LMGP02010411;LMGP02010430;LMGP02010481;LMGP02010519;LMGP02010564;LMGP02010593;LMGP02010654	-	C00350	52924097;52924116;52924135;52924184;52924222;52924265;52924294;52924355
LPC 30:1-SN2	4.5014	0.000473932	1.18065	up	LPC	Lysophophatidylcholine	-	-	C04230	-
TG O-12:0_16:4_16:4	4.48306	5.32344e-08	1.09905	up	EtherTG	Ether-linked triacylglycerol	-	-	-	-
DG 17:1_18:1	4.47424	0.000295131	1.18467	up	DG	Diacylglycerol	LMGL02010033;LMGL02010034;LMGL02010373;LMGL02010438;LMGL02010461;LMGL02010523	-	C00641	53478009;56936340;56936377;56936405;9543701;9543702
TG O-10:0_14:0_14:0	4.45411	0.00379264	1.2528	up	EtherTG	Ether-linked triacylglycerol	-	-	-	-
LPC 15:0	4.44965	7.25851e-06	1.19045	up	LPC	Lysophophatidylcholine	LMGP01050016	HMDB10381	C04230	24779458
TG 16:0_16:3_18:1	4.41525	0.00525602	1.09683	up	TG	Triacylglycerol	LMGL03010046;LMGL03010047;LMGL03010064;LMGL03010065;LMGL03012780;LMGL03012793;LMGL03012837;LMGL03012889;LMGL03012942;LMGL03012982;LMGL03013344;LMGL03013368;LMGL03013452;LMGL03013471;LMGL03013489;LMGL03013506;LMGL03013523;LMGL03013538;LMGL03013756;LMGL03013782;LMGL03013851;LMGL03013873;LMGL03013894;LMGL03013969;LMGL03013986;LMGL03014001;LMGL03014162;LMGL03014237;LMGL03014261;LMGL03014345;LMGL03014…	HMDB05435	C00422	25240359;56936576;56936587;56936631;56936683;56936734;56936774;56937134;56937158;56937242;56937261;56937279;56937296;56937313;56937328;56937546;56937572;56937641;56937663;56937684;56937759;56937776;56937791;56937952;56938026;56938050;56938134;56938152;56938153;56938431;56938455;56938521;56938538;56938539;56938557;56938783;56938849;56938870;56938871;56938891;56939194;56939195;56939216;56939237;569…
SM 17:2;2O/16:0	4.41267	3.27716e-06	1.18532	up	SM	Sphingomyelin	LMSP03010036	-	C00550	52931135
HexCer 22:1;2O/20:0	4.40735	0.000119326	1.19802	up	HexCer_NS	Hexosylceramide non-hydroxyfatty acid-sphingosine	LMSP0501AA09;LMSP0501AA22;LMSP0501AC05	HMDB04978	-	44260152;6321361;6321367
LPG 18:1	4.40531	3.19045e-05	1.14219	up	LPG	Lysophosphatidylglycerol	LMGP04050006	-	-	9547135
PE 32:1	4.35047	3.31838e-05	1.08949	up	PE	Phosphatidylethanolamine	LMGP02010372;LMGP02010395;LMGP02010432;LMGP02010456;LMGP02010482;LMGP02010520;LMGP02010541;LMGP02010565;LMGP02010622;LMGP02010794;LMGP02010841;LMGP02011199;LMGP02011228;LMGP02011247	-	C00350	52924079;52924101;52924137;52924160;52924185;52924223;52924244;52924266;52924323;52924495;52924542;52924900;52924925;52924944
DGCC 16:0_18:4	4.32724	1.29281e-05	1.16816	up	DGCC	Diacylglyceryl-3-O-carboxyhydroxymethylcholine	-	-	-	-
LPC 20:4-SN1	4.29846	2.19812e-06	1.19144	up	LPC	Lysophophatidylcholine	LMGP01050048;LMGP01050121;LMGP01050140	HMDB10395;HMDB10396	C04230;C04230	24779476;52924038;53480469
PC 31:1	4.29494	1.23838e-07	1.07152	up	PC	Phosphatidylcholine	LMGP01010002;LMGP01010008;LMGP01010535;LMGP01011328;LMGP01011347;LMGP01011367;LMGP01011386;LMGP01011437;LMGP01011464;LMGP01011477;LMGP01011523;LMGP01011596;LMGP01011756	HMDB07936	C00157	24778517;24778520;24778657;52922138;52922176;52922216;52922254;52922356;52922410;52922436;52922525;52922671;52922991
LPC 17:1	4.2323	4.61377e-05	1.13985	up	LPC	Lysophophatidylcholine	LMGP01050002;LMGP01050126	-	C04230	24779451;42607442
ST 28:2;O;Hex;FA 8:0	4.16494	2.15692e-08	1.14128	up	AHexBRS	Acylhexosyl brassicasterol	-	-	-	-
TG O-8:0_8:0_22:1	4.14818	0.00306631	1.18599	up	EtherTG	Ether-linked triacylglycerol	-	-	-	-
LPC 20:0-SN1	4.12963	1.5813e-06	1.17196	up	LPC	Lysophophatidylcholine	LMGP01050045	HMDB10390	C04230	24779473
PE 16:1_18:1	4.1211	3.49124e-09	1.13872	up	PE	Phosphatidylethanolamine	LMGP02010042;LMGP02010379;LMGP02010416;LMGP02010441;LMGP02010492;LMGP02010545;LMGP02010599;LMGP02010798;LMGP02010844;LMGP02010873;LMGP02011071;LMGP02011194;LMGP02011198;LMGP02011209;LMGP02011220	HMDB08928	C00350	52924086;52924121;52924146;52924195;52924247;52924300;52924499;52924545;52924574;52924772;52924895;52924899;52924908;52924918;9546747
HexCer 18:1;2O/22:0	4.10777	0.00250674	1.16689	up	HexCer_NS	Hexosylceramide non-hydroxyfatty acid-sphingosine	LMSP0501AA07;LMSP0501AA51;LMSP0501AC04	-	-	44260151;6321359;70699232
PI 36:5	4.0457	0.000510184	1.08282	up	PI	Phosphatidylinositol	LMGP06010105;LMGP06010299;LMGP06010319;LMGP06010320;LMGP06010347;LMGP06010376;LMGP06010405;LMGP06010594;LMGP06010623;LMGP06010759;LMGP06010870;LMGP06010874	-	C01194	52927558;52927752;52927772;52927773;52927800;52927829;52927858;52928047;52928076;52928212;52928323;52928327
SM 52:6;3O	3.99533	0.000187099	1.09344	up	SM	Sphingomyelin	-	-	C00550	-
LNAPE 16:1/N-18:0	3.92611	3.27406e-09	1.1255	up	LNAPE	N-acyl-lysophosphatidylethanolamine	-	-	-	-
DGCC 18:2_18:5	3.92149	5.8651e-06	1.13014	up	DGCC	Diacylglyceryl-3-O-carboxyhydroxymethylcholine	-	-	-	-
DG 20:0_18:1	3.90598	0.000906558	1.10862	up	DG	Diacylglycerol	LMGL02010081;LMGL02010082;LMGL02010105;LMGL02010106;LMGL02010113;LMGL02010531	HMDB07116;HMDB07144;HMDB07166;HMDB07223	C00641	56936413;9543747;9543748;9543771;9543772;9543778
TG 8:0_13:1_18:1	3.90455	7.86826e-06	1.07379	up	TG	Triacylglycerol	-	-	C00422	-
TG O-10:0_16:3_16:3	3.86724	5.34569e-05	1.07597	up	EtherTG	Ether-linked triacylglycerol	-	-	-	-
PE 16:0_18:1	3.86374	5.3394e-08	1.09496	up	PE	Phosphatidylethanolamine	LMGP02010009;LMGP02010010;LMGP02010099;LMGP02010311;LMGP02010378;LMGP02010415;LMGP02010440;LMGP02010462;LMGP02010491;LMGP02010524;LMGP02010544;LMGP02010569;LMGP02010770;LMGP02010797;LMGP02010824;LMGP02010843;LMGP02011040;LMGP02011204	HMDB08926;HMDB08927;HMDB09055	C00350	5283496;52924085;52924120;52924145;52924166;52924194;52924227;52924246;52924270;52924471;52924498;52924525;52924544;52924741;52924905;9546726;9546802;9547009
LPE O-18:1	3.85137	2.60567e-06	1.13308	up	EtherLPE	Ether-linked lysophosphatidylethanolamine	LMGP02060004	-	C05209	42607468
PE 16:1_22:6	3.81364	6.03477e-05	1.05461	up	PE	Phosphatidylethanolamine	LMGP02010673;LMGP02010702;LMGP02010730;LMGP02010760;LMGP02010918;LMGP02010946;LMGP02010947;LMGP02010974;LMGP02011138;LMGP02011216	-	C00350	52924374;52924403;52924431;52924461;52924619;52924647;52924648;52924675;52924839;52924914
TG O-16:3_18:2_18:2	3.81205	0.00276804	1.01699	up	EtherTG	Ether-linked triacylglycerol	-	-	-	-
SHexCer 35:4;3O	3.80249	1.51869e-06	1.08003	up	SHexCer	Sulfatide	-	-	C06125	-
NAOrn 16:2/15:1	3.79534	0.000300371	1.00341	up	NAOrn	N-acyl ornithine	-	-	C02858	-
SHexCer 37:0;2O	3.77526	1.28875e-05	1.11133	up	SHexCer	Sulfatide	-	-	C06125	-
PC 16:1_18:2	3.75693	0.00292238	1.10929	up	PC	Phosphatidylcholine	LMGP01010598;LMGP01010601;LMGP01010690;LMGP01011374;LMGP01011399;LMGP01011530;LMGP01011560;LMGP01011620;LMGP01011646;LMGP01011677;LMGP01011838;LMGP01011868;LMGP01012127;LMGP01012192	HMDB07974;HMDB07975;HMDB08006	C00157	24778699;24778702;24778768;52922230;52922280;52922539;52922599;52922719;52922771;52922833;52923155;52923213;53478605;53478943
PC 17:0_16:1	3.73759	7.25622e-07	1.10144	up	PC	Phosphatidylcholine	LMGP01010541;LMGP01010571;LMGP01011353;LMGP01011371;LMGP01011395;LMGP01011415;LMGP01011442;LMGP01011480;LMGP01011502;LMGP01011527;LMGP01011584;LMGP01011598;LMGP01011731;LMGP01011758;LMGP01011806	HMDB07938	C00157	24778662;24778684;52922188;52922224;52922272;52922312;52922366;52922442;52922485;52922533;52922647;52922675;52922941;52922995;52923091
SM 16:0;2O/16:1	3.71851	0.0024777	1.10303	up	SM	Sphingomyelin	LMSP03010028;LMSP03010035	-	C00550	11433862;52931133
PE 17:1_18:1	3.61092	3.57419e-08	1.09666	up	PE	Phosphatidylethanolamine	LMGP02010403;LMGP02010465;LMGP02010494;LMGP02010528;LMGP02010546;LMGP02010572;LMGP02010601;LMGP02010627;LMGP02010641;LMGP02010660;LMGP02010800;LMGP02010846;LMGP02010875;LMGP02011072	-	C00350	42627790;52924109;52924168;52924197;52924231;52924273;52924302;52924328;52924342;52924361;52924501;52924547;52924576;52924773
TG 16:1_18:1_18:2	3.60993	0.0250321	1.07693	up	TG	Triacylglycerol	LMGL03010117;LMGL03010120;LMGL03010123;LMGL03010124;LMGL03010127;LMGL03010141;LMGL03010142;LMGL03010145;LMGL03010146;LMGL03010158;LMGL03010159;LMGL03010160;LMGL03012679;LMGL03012896;LMGL03012949;LMGL03012998;LMGL03013459;LMGL03013478;LMGL03013496;LMGL03013513;LMGL03013530;LMGL03013545;LMGL03013584;LMGL03013595;LMGL03013858;LMGL03013880;LMGL03013901;LMGL03014009;LMGL03014022;LMGL03014035;LMGL03014…	HMDB05363;HMDB05390;HMDB05440	C00422	25240363;25240364;25240365;56936477;56936690;56936741;56936790;56937249;56937268;56937286;56937303;56937320;56937335;56937374;56937385;56937648;56937670;56937691;56937799;56937812;56937825;56938033;56938057;56938141;56938160;56938178;56938195;56938212;56938227;56938438;56938462;56938546;56938565;56938583;56938600;56938617;56938790;56938856;56938878;56938899;56938970;56938987;56939002;56939202;569…
PC O-18:1	3.57511	0.00140739	1.06377	up	EtherPC	Ether-linked phosphatidylcholine	-	-	C05212	-
NAOrn 16:1/15:0	3.55457	4.80389e-05	1.09551	up	NAOrn	N-acyl ornithine	-	-	C02858	-
PI-Cer 36:1;3O	3.48395	1.12321e-06	1.08553	up	PI_Cer	Ceramide phosphoinositol	-	-	-	-
DG 18:0_18:1	3.46697	0.000116782	1.08392	up	DG	Diacylglycerol	LMGL02010043;LMGL02010047;LMGL02010048;LMGL02010052;LMGL02010396;LMGL02010419;LMGL02010466;LMGL02010524	HMDB07108;HMDB07136;HMDB07160	C00641	53477992;56936350;56936382;56936406;6443547;9543714;9543715;9543718
PI 17:0_20:4	3.41969	9.28901e-06	1.04713	up	PI	Phosphatidylinositol	LMGP06010004;LMGP06010127;LMGP06010237;LMGP06010266;LMGP06010352;LMGP06010380;LMGP06010410;LMGP06010434;LMGP06010462;LMGP06010463;LMGP06010536;LMGP06010566;LMGP06010595;LMGP06010760	-	C01194	52927580;52927690;52927719;52927805;52927833;52927863;52927887;52927915;52927916;52927989;52928019;52928048;52928213;9547141
CoQ4	3.39921	8.10419e-06	1.03209	up	CoQ	Coenzyme Q	LMPR02010003	HMDB06709	-	5283545
SM 32:1;2O	3.39866	0.00115597	1.06196	up	SM	Sphingomyelin	LMSP03010028;LMSP03010035	-	C00550	11433862;52931133
LPC O-18:3	3.39488	6.06611e-06	1.0829	up	EtherLPC	Ether-linked lysophosphatidylcholine	-	-	C04317	-
DG 24:0_16:1	3.3927	1.0725e-05	1.03112	up	DG	Diacylglycerol	LMGL02010128;LMGL02010156;LMGL02010157;LMGL02010538	HMDB07174;HMDB07231;HMDB07369	C00641	56936420;9543793;9543821;9543822
Cer 18:1;2O/17:0	3.3859	3.74696e-06	1.05553	up	Cer_NS	Ceramide non-hydroxyfatty acid-sphingosine	LMSP02010020;LMSP02010043	-	C00195	44584335;70698934
LNAPE 17:1/N-18:0	3.35466	4.9552e-08	1.02484	up	LNAPE	N-acyl-lysophosphatidylethanolamine	-	-	-	-
LPE 20:5	3.34448	0.000402089	1.04371	up	LPE	Lysophosphatidylethanolamine	LMGP02050027;LMGP02050053	HMDB11489	C04438	52925146;53480938
HexCer 26:1;2O/16:0	3.32811	0.000152027	1.06148	up	HexCer_NS	Hexosylceramide non-hydroxyfatty acid-sphingosine	LMSP0501AA09;LMSP0501AA22;LMSP0501AC05	HMDB04978	-	44260152;6321361;6321367
LPC 18:1	3.27922	0.000300582	1.00154	up	LPC	Lysophophatidylcholine	LMGP01050029;LMGP01050030;LMGP01050032;LMGP01050079;LMGP01050080;LMGP01050082;LMGP01050114;LMGP01050138	HMDB02815;HMDB10385	C04230;C04230	16081932;24779465;24779466;24779492;24779493;24779494;53480465;6449974
PC 16:1_16:2	3.25355	0.000153025	1.01137	up	PC	Phosphatidylcholine	LMGP01010497;LMGP01011331;LMGP01011369;LMGP01011391;LMGP01011441;LMGP01011556;LMGP01011617;LMGP01011642;LMGP01011673;LMGP01011866	HMDB07876	C00157	24778625;52922144;52922220;52922264;52922364;52922591;52922713;52922763;52922825;52923209
PI 37:4	3.22987	0.000203518	1.00842	up	PI	Phosphatidylinositol	LMGP06010004;LMGP06010127;LMGP06010237;LMGP06010266;LMGP06010352;LMGP06010380;LMGP06010410;LMGP06010434;LMGP06010462;LMGP06010463;LMGP06010536;LMGP06010566;LMGP06010595;LMGP06010760	-	C01194	52927580;52927690;52927719;52927805;52927833;52927863;52927887;52927915;52927916;52927989;52928019;52928048;52928213;9547141
PE O-16:1_17:1	3.22835	1.67448e-06	1.04335	up	EtherPE	Ether-linked phosphatidylethanolamine	LMGP02020029	-	C04475	52924964
LNAPE 16:0/N-18:0	3.13746	8.3529e-07	1.01516	up	LNAPE	N-acyl-lysophosphatidylethanolamine	-	-	-	-
PC 18:0_18:0	3.082	4.45038e-05	1.03132	up	PC	Phosphatidylcholine	LMGP01010006;LMGP01010422;LMGP01010449;LMGP01010468;LMGP01010511;LMGP01010549;LMGP01010616;LMGP01011002;LMGP01011085;LMGP01011509;LMGP01011735;LMGP01011956	HMDB07886;HMDB07977;HMDB08265;HMDB08525	C00157	24778560;24778584;24778602;24778638;24778670;24778711;24779030;24779104;52922497;52922949;52923389;94190
LPC 18:2-SN1	3.07801	9.01932e-05	1.00538	up	LPC	Lysophophatidylcholine	LMGP01050034;LMGP01050035	HMDB10386	C04230	11005824;24779467
PC 35:5	3.07282	1.74033e-06	1.0393	up	PC	Phosphatidylcholine	LMGP01011425;LMGP01011454;LMGP01011536;LMGP01011564;LMGP01011565;LMGP01011650;LMGP01011681;LMGP01011709;LMGP01011902;LMGP01011930	-	C00157	52922332;52922390;52922551;52922607;52922609;52922779;52922841;52922897;52923281;52923337
PE 16:1_20:3	3.05025	1.80146e-08	1.0001	up	PE	Phosphatidylethanolamine	LMGP02010096;LMGP02010111;LMGP02010112;LMGP02010421;LMGP02010532;LMGP02010643;LMGP02010691;LMGP02010749;LMGP02010909;LMGP02011104;LMGP02011174;LMGP02011190;LMGP02011197;LMGP02011203	HMDB08937;HMDB09093	C00350	52924126;52924235;52924344;52924392;52924450;52924610;52924805;52924875;52924891;52924898;52924904;9546800;9546812;9546813
ST 29:1;O;Hex;FA 16:0	3.00228	1.54582e-05	1.02767	up	AHexSIS	Acylhexosyl sitosterol	-	-	-	-
SM 32:2;2O	2.99074	6.66601e-06	1.01113	up	SM	Sphingomyelin	LMSP03010034	-	C00550	52931131
HexCer 30:5;3O(FA 22:1)	0.35445	2.62334e-06	1.00489	down	HexCer_EOS	Hexosylceramide Esterified omega-hydroxy fatty acid-sphingosine	-	-	-	-
SM 8:1;2O/34:2	0.340498	5.2414e-09	1.00323	down	SM	Sphingomyelin	LMSP03010080	-	C00550	52931215
LPE 38:5	0.335035	2.35542e-07	1.03178	down	LPE	Lysophosphatidylethanolamine	-	-	C04438	-
MGDG O-8:0_4:0	0.33009	4.90735e-05	1.02397	down	EtherMGDG	Ether-linked monogalactosyldiacylglycerol	-	-	-	-
LPC 42:8-SN2	0.306378	7.29097e-06	1.05158	down	LPC	Lysophophatidylcholine	-	-	C04230	-
ST 24:1;O3;T/24:6	0.304429	5.52999e-07	1.01287	down	TLCAE	Esterified taurolithocholic acid	-	-	-	-
Cer 9:0;2O/19:0	0.299828	1.32701e-05	1.04439	down	Cer_NDS	Ceramide non-hydroxyfatty acid-dihydrosphingosine	-	-	C12126	-
PE-Cer 12:1;2O/24:0	0.298832	1.83837e-08	1.08774	down	PE_Cer	Ceramide phosphoethanolamine	LMSP03020008;LMSP03020022	-	C06062	70699005;9547203
PC 40:1	0.295162	1.97136e-05	1.02708	down	PC	Phosphatidylcholine	LMGP01010659;LMGP01010811;LMGP01010839;LMGP01010845;LMGP01010909;LMGP01011017;LMGP01011018;LMGP01011019;LMGP01011020;LMGP01011089;LMGP01011090;LMGP01011091;LMGP01011092;LMGP01011093;LMGP01011094;LMGP01011593;LMGP01011781;LMGP01011824;LMGP01011969;LMGP01012015	HMDB07993;HMDB08052;HMDB08084;HMDB08117;HMDB08275;HMDB08531;HMDB08532	C00157	24778745;24778866;24778893;24778899;24778951;24779042;24779043;24779044;24779045;24779108;24779109;24779110;24779111;24779112;24779113;52922665;52923041;52923127;52923415;52923507
MGDG O-11:0_6:0	0.293211	7.79775e-05	1.02951	down	EtherMGDG	Ether-linked monogalactosyldiacylglycerol	-	-	-	-
SM 38:1;2O	0.291148	8.43851e-05	1.03203	down	SM	Sphingomyelin	LMSP03010005;LMSP03010061	-	C00550	44260124;52931183
PE 18:1_18:1	0.28881	5.15171e-08	1.08051	down	PE	Phosphatidylethanolamine	LMGP02010039;LMGP02010044;LMGP02010052;LMGP02010109;LMGP02010420;LMGP02010448;LMGP02010510;LMGP02010530;LMGP02010578;LMGP02010607;LMGP02010774;LMGP02010802;LMGP02010848;LMGP02010877;LMGP02011043;LMGP02011073;LMGP02011193	HMDB08994;HMDB09059	C00350	52924125;52924153;52924213;52924233;52924279;52924308;52924475;52924503;52924549;52924578;52924744;52924774;52924894;9546744;9546749;9546757;9546810
Hex2Cer 18:1;2O/16:0	0.287682	1.34032e-06	1.08294	down	Hex2Cer	Dihexosylceramide	LMSP0501AB03;LMSP0501AD01	-	-	44260140;44260156
MGDG O-16:3_2:0	0.28298	0.000483529	1.00112	down	EtherMGDG	Ether-linked monogalactosyldiacylglycerol	-	-	-	-
PC 36:1	0.27922	5.73382e-09	1.08948	down	PC	Phosphatidylcholine	LMGP01010750;LMGP01010751;LMGP01010753;LMGP01010754;LMGP01010756;LMGP01010758;LMGP01010759;LMGP01010761;LMGP01010840;LMGP01010888;LMGP01011376;LMGP01011404;LMGP01011456;LMGP01011468;LMGP01011488;LMGP01011510;LMGP01011537;LMGP01011736;LMGP01011764;LMGP01011790;LMGP01011811;LMGP01011957;LMGP01011980;LMGP01012006;LMGP01012129;LMGP01012218	HMDB08037;HMDB08038;HMDB08069;HMDB08102	C00157	24778815;24778816;24778818;24778819;24778821;24778823;24778824;24778825;24778894;24778936;52922234;52922290;52922394;52922418;52922458;52922499;52922553;52922951;52923007;52923059;52923101;52923391;52923437;52923489;53478609;53479165
PE O-18:0_20:4	0.27792	4.24948e-07	1.08402	down	EtherPE	Ether-linked phosphatidylethanolamine	LMGP02020037;LMGP02020076;LMGP02020092	-	C04475	52924972;52925011;52925027
SM 40:1;2O	0.273364	1.35527e-09	1.07347	down	SM	Sphingomyelin	LMSP03010006;LMSP03010073	-	C00550	44260125;52931205
LPC 42:7-SN2	0.272635	0.000435765	1.09945	down	LPC	Lysophophatidylcholine	-	-	C04230	-
LPC 32:1-SN1	0.272016	7.15276e-08	1.10807	down	LPC	Lysophophatidylcholine	-	-	C04230	-
PE 16:1_24:5	0.268932	3.79639e-05	1.09017	down	PE	Phosphatidylethanolamine	LMGP02010094;LMGP02010678;LMGP02010766;LMGP02010864;LMGP02010894;LMGP02010924;LMGP02010953;LMGP02010981;LMGP02011087;LMGP02011115;LMGP02011142	HMDB09012	C00350	52924379;52924467;52924565;52924595;52924625;52924654;52924682;52924788;52924816;52924843;9546798
LPE O-18:3	0.267838	3.22655e-06	1.14034	down	EtherLPE	Ether-linked lysophosphatidylethanolamine	-	-	C05209	-
MGDG O-9:0_18:3	0.26781	7.08341e-05	1.08369	down	EtherMGDG	Ether-linked monogalactosyldiacylglycerol	-	-	-	-
CAR 26:7	0.267264	1.01283e-06	1.10775	down	CAR	Acylcarnitine	-	-	C02301	-
Cer 18:1;2O/16:1	0.264664	0.000398405	1.07504	down	Cer_NS	Ceramide non-hydroxyfatty acid-sphingosine	LMSP02010024;LMSP02010037;LMSP02010054;LMSP02010062	-	C00195	10369909;52931118;70698928;70698949
PC 38:5	0.256052	1.6325e-05	1.09121	down	PC	Phosphatidylcholine	LMGP01010645;LMGP01010647;LMGP01010805;LMGP01010807;LMGP01010905;LMGP01011497;LMGP01011633;LMGP01011661;LMGP01011690;LMGP01011720;LMGP01011821;LMGP01011849;LMGP01011850;LMGP01011879;LMGP01011908;LMGP01011937;LMGP01012073;LMGP01012156;LMGP01012157;LMGP01012165;LMGP01012170;LMGP01012199;LMGP01012208;LMGP01012211	HMDB07989;HMDB07990;HMDB08050;HMDB08114	C00157	24778735;24778737;24778860;24778862;24778948;52922475;52922745;52922801;52922859;52922919;52923121;52923177;52923179;52923235;52923293;52923351;52923623;53478741;53478743;53478767;53478787;53478959;53479033;53479069
PE O-18:1_22:1	0.252223	1.0959e-06	1.09492	down	EtherPE	Ether-linked phosphatidylethanolamine	LMGP02020059;LMGP02020081	-	C04475	52924994;52925016
LPC 40:6	0.252043	0.000149826	1.07319	down	LPC	Lysophophatidylcholine	-	-	C04230	-
SMGDG O-9:0_26:2	0.250302	0.000409295	1.15047	down	EtherSMGDG	Semino lipid	-	-	-	-
PC O-18:0_18:1	0.249618	0.00135548	1.15524	down	EtherPC	Ether-linked phosphatidylcholine	-	-	C05212	-
PI 38:3	0.246063	4.58451e-07	1.16916	down	PI	Phosphatidylinositol	LMGP06010192;LMGP06010302;LMGP06010325;LMGP06010353;LMGP06010381;LMGP06010486;LMGP06010487;LMGP06010509;LMGP06010538;LMGP06010568;LMGP06010732;LMGP06010855	-	C01194	52927645;52927755;52927778;52927806;52927834;52927939;52927940;52927962;52927991;52928021;52928185;52928308
MGDG O-22:0_28:0	0.244872	0.000506972	1.04137	down	EtherMGDG	Ether-linked monogalactosyldiacylglycerol	-	-	-	-
SM 14:0;2O/28:3	0.243775	1.37931e-07	1.1492	down	SM	Sphingomyelin	LMSP03010080	-	C00550	52931215
PC 18:0_20:1	0.239767	4.11022e-07	1.16877	down	PC	Phosphatidylcholine	LMGP01010516;LMGP01010638;LMGP01010783;LMGP01010784;LMGP01010785;LMGP01010786;LMGP01010787;LMGP01010879;LMGP01010902;LMGP01011005;LMGP01011008;LMGP01011009;LMGP01011010;LMGP01011471;LMGP01011494;LMGP01011545;LMGP01011743;LMGP01011773;LMGP01011816;LMGP01011961;LMGP01011984;LMGP01012010	HMDB07894;HMDB07986;HMDB08044;HMDB08109;HMDB08268;HMDB08269	C00157	24778643;24778728;24778842;24778843;24778844;24778845;24778846;24778928;24778945;24779033;24779036;24779037;24779038;52922424;52922469;52922569;52922965;52923025;52923111;52923399;52923445;52923497
SM 38:2;2O	0.237502	9.29229e-08	1.16967	down	SM	Sphingomyelin	LMSP03010058;LMSP03010059;LMSP03010060	-	C00550	52931177;52931179;52931181
MGDG O-16:3_7:0	0.236296	2.57496e-05	1.13335	down	EtherMGDG	Ether-linked monogalactosyldiacylglycerol	-	-	-	-
PE O-18:0_22:1	0.23123	5.59353e-06	1.09112	down	EtherPE	Ether-linked phosphatidylethanolamine	LMGP02020058;LMGP02020080	-	C04475	52924993;52925015
PC 21:2_21:2	0.229962	2.68544e-05	1.15361	down	PC	Phosphatidylcholine	LMGP01011804;LMGP01011863;LMGP01011893;LMGP01011921;LMGP01011997;LMGP01012026;LMGP01012056;LMGP01012085;LMGP01012177;LMGP01012181;LMGP01012184;LMGP01012205;LMGP01012207;LMGP01012215;LMGP01012217;LMGP01012228;LMGP01012229;LMGP01012238;LMGP01012243;LMGP01012244	-	C00157	52923087;52923205;52923263;52923319;52923471;52923529;52923589;52923647;53478821;53478845;53478867;53478985;53479015;53479097;53479149;53479193;53479195;53479447;53479505;53479507
LPC 38:5-SN1	0.226535	8.59428e-08	1.19503	down	LPC	Lysophophatidylcholine	-	-	C04230	-
PG 18:0_18:1	0.221054	0.000209196	1.13364	down	PG	Phosphatidylglycerol	LMGP04010037;LMGP04010106;LMGP04010134;LMGP04010186;LMGP04010216;LMGP04010238;LMGP04010264;LMGP04010460;LMGP04010488;LMGP04010514;LMGP04010534;LMGP04010679;LMGP04010702;LMGP04010727;LMGP04010961;LMGP04010970	HMDB10604	C00344	24779551;52926371;52926399;52926451;52926481;52926503;52926529;52926725;52926753;52926779;52926799;52926944;52926967;52926992;52927224;52927233
ADGGA 22:5_20:5_22:5	0.220318	0.000683762	1.1699	down	ADGGA	Acyl diacylglyceryl glucuronide	-	-	-	-
SM 41:2;2O	0.219681	8.54459e-07	1.19593	down	SM	Sphingomyelin	LMSP03010074;LMSP03010075	-	C00550	52931207;52931209
PE O-18:2_18:1	0.213872	1.25133e-10	1.22672	down	EtherPE	Ether-linked phosphatidylethanolamine	LMGP02020049;LMGP02020050;LMGP02020096	-	C04475	52924984;52924985;52925031
PE O-18:2_22:1	0.210135	3.70126e-07	1.14984	down	EtherPE	Ether-linked phosphatidylethanolamine	LMGP02020082	-	C04475	52925017
PC O-16:0_16:1	0.208253	2.12394e-11	1.23474	down	EtherPC	Ether-linked phosphatidylcholine	-	-	C05212	-
SM 42:3;2O	0.206988	0.000137647	1.15163	down	SM	Sphingomyelin	LMSP03010080	-	C00550	52931215
Cer 19:1;2O/15:1;(3OH)	0.203542	3.06959e-06	1.25542	down	Cer_BS	Ceramide beta-hydroxy fatty acid-sphingosine	LMSP02010069;LMSP02010076;LMSP02010083;LMSP02010087	-	-	70698956;70698963;70698970;70698974
SHexCer 42:5;3O	0.202573	1.11203e-06	1.21654	down	SHexCer	Sulfatide	-	-	C06125	-
PC 32:1	0.200089	1.19075e-05	1.17649	down	PC	Phosphatidylcholine	LMGP01010490;LMGP01010492;LMGP01010566;LMGP01010882;LMGP01011329;LMGP01011352;LMGP01011389;LMGP01011413;LMGP01011439;LMGP01011479;LMGP01011500;LMGP01011525;LMGP01011582;LMGP01011757;LMGP01011805;LMGP01012145	HMDB07872;HMDB07873;HMDB07969;HMDB08097	C00157	24778618;24778620;24778931;52922140;52922186;52922260;52922308;52922360;52922440;52922481;52922529;52922643;52922993;52923089;53478711;6443788
PC 30:0	0.198991	0.000102235	1.17195	down	PC	Phosphatidylcholine	LMGP01010395;LMGP01010416;LMGP01010438;LMGP01010461;LMGP01010481;LMGP01010530;LMGP01010560;LMGP01010702;LMGP01010736;LMGP01010969;LMGP01010995;LMGP01011265	HMDB07869;HMDB07934;HMDB07965	C00157	129657;24778534;24778554;24778573;24778595;24778654;24778679;24778779;24778808;24779002;24779023;24779257
PE O-16:1_18:3	0.197716	0.000152105	1.21606	down	EtherPE	Ether-linked phosphatidylethanolamine	LMGP02020030	-	C04475	52924965
PS 38:3	0.196959	0.00382272	1.0446	down	PS	Phosphatidylserine	LMGP03010224;LMGP03010334;LMGP03010357;LMGP03010385;LMGP03010413;LMGP03010518;LMGP03010519;LMGP03010541;LMGP03010570;LMGP03010600;LMGP03010763;LMGP03010885	-	C02737	52925334;52925444;52925467;52925495;52925523;52925628;52925629;52925651;52925680;52925710;52925873;52925994
PS 16:0_18:1	0.196625	0.000345131	1.10577	down	PS	Phosphatidylserine	LMGP03010007;LMGP03010024;LMGP03010065;LMGP03010102;LMGP03010127;LMGP03010149;LMGP03010178;LMGP03010211;LMGP03010231;LMGP03010256;LMGP03010457;LMGP03010484;LMGP03010511;LMGP03010530;LMGP03010725;LMGP03010887;LMGP03010959	HMDB12357	C02737	5283499;52925175;52925212;52925237;52925259;52925288;52925321;52925341;52925366;52925567;52925594;52925621;52925640;52925835;52925996;52926066;9547073
PC 18:1_20:4	0.193186	4.64892e-06	1.20138	down	PC	Phosphatidylcholine	LMGP01010645;LMGP01010647;LMGP01010805;LMGP01010807;LMGP01010905;LMGP01011497;LMGP01011633;LMGP01011661;LMGP01011690;LMGP01011720;LMGP01011821;LMGP01011849;LMGP01011850;LMGP01011879;LMGP01011908;LMGP01011937;LMGP01012073;LMGP01012156;LMGP01012157;LMGP01012165;LMGP01012170;LMGP01012199;LMGP01012208;LMGP01012211	HMDB07989;HMDB07990;HMDB08050;HMDB08114	C00157	24778735;24778737;24778860;24778862;24778948;52922475;52922745;52922801;52922859;52922919;52923121;52923177;52923179;52923235;52923293;52923351;52923623;53478741;53478743;53478767;53478787;53478959;53479033;53479069
MGDG O-16:3_3:0	0.192594	5.95333e-07	1.25717	down	EtherMGDG	Ether-linked monogalactosyldiacylglycerol	-	-	-	-
PE O-18:1_22:5	0.192572	1.14426e-09	1.27091	down	EtherPE	Ether-linked phosphatidylethanolamine	LMGP02020104	-	C04475	52923729
PC O-16:0_16:0	0.191549	1.26386e-08	1.27908	down	EtherPC	Ether-linked phosphatidylcholine	-	-	C05212	-
SHexCer 37:0;2O	0.1903	1.00202e-06	1.26841	down	SHexCer	Sulfatide	-	-	C06125	-
Cer 18:2;2O/16:0;(2OH)	0.189674	2.18769e-07	1.28637	down	Cer_AS	Ceramide alpha-hydroxy fatty acid-sphingosine	LMSP02010069;LMSP02010076;LMSP02010083;LMSP02010087	-	-	70698956;70698963;70698970;70698974
PC 20:1_20:2	0.189638	3.83667e-06	1.23914	down	PC	Phosphatidylcholine	LMGP01010812;LMGP01011022;LMGP01011612;LMGP01011637;LMGP01011666;LMGP01011695;LMGP01011799;LMGP01011825;LMGP01011855;LMGP01011885;LMGP01011989;LMGP01011990;LMGP01012017;LMGP01012047;LMGP01012159;LMGP01012172;LMGP01012185;LMGP01012202;LMGP01012222;LMGP01012230	-	C00157	24778867;24779047;52922703;52922753;52922811;52922869;52923077;52923129;52923189;52923247;52923455;52923457;52923511;52923571;53478747;53478791;53478879;53478967;53479179;53479227
SM 34:0;3O	0.188231	3.67758e-08	1.26767	down	SM	Sphingomyelin	-	-	C00550	-
PG 18:1_20:4;O	0.188044	1.20491e-06	1.22977	down	OxPG	Oxidized phosphatidylglycerol	-	-	-	-
TG O-16:4_8:0_8:0	0.187974	5.85712e-07	1.24255	down	EtherTG	Ether-linked triacylglycerol	-	-	-	-
HexCer 22:3;2O/26:7	0.186938	2.09426e-08	1.28028	down	HexCer_NS	Hexosylceramide non-hydroxyfatty acid-sphingosine	-	-	-	-
HexCer 17:3;2O/30:8	0.186196	5.81809e-06	1.29557	down	HexCer_NS	Hexosylceramide non-hydroxyfatty acid-sphingosine	-	-	-	-
SM 8:0;2O/26:0	0.18574	1.55295e-07	1.28615	down	SM	Sphingomyelin	LMSP03010004	-	C00550	9939965
TG O-16:3_8:0_8:0	0.185303	3.89479e-06	1.23762	down	EtherTG	Ether-linked triacylglycerol	-	-	-	-
PC 18:1_24:2	0.182651	7.22584e-07	1.27107	down	PC	Phosphatidylcholine	LMGP01011832;LMGP01011862;LMGP01011892;LMGP01011996;LMGP01012025;LMGP01012055	-	C00157	52923143;52923203;52923261;52923469;52923527;52923587
TG O-22:5_18:1_18:1	0.180582	0.0037144	1.08597	down	EtherTG	Ether-linked triacylglycerol	-	-	-	-
PC 16:0_16:0	0.180317	5.84081e-11	1.30982	down	PC	Phosphatidylcholine	LMGP01010397;LMGP01010418;LMGP01010444;LMGP01010463;LMGP01010488;LMGP01010537;LMGP01010564;LMGP01010704;LMGP01010739;LMGP01010970;LMGP01010997;LMGP01011062;LMGP01011080;LMGP01011267	HMDB00564;HMDB07871;HMDB08031	C00157	131150;24778536;24778556;24778579;24778597;24778659;24778781;24779003;24779025;24779084;24779101;24779259;3082163;452110
LPE 36:1	0.17997	9.72458e-08	1.29736	down	LPE	Lysophosphatidylethanolamine	-	-	C04438	-
SM 34:1;2O	0.179173	0.000582643	1.16984	down	SM	Sphingomyelin	LMSP03010003;LMSP03010042;LMSP03010043	-	C00550	52931147;52931149;9939941
LNAPE 18:1/N-20:1	0.175395	6.03446e-06	1.30507	down	LNAPE	N-acyl-lysophosphatidylethanolamine	-	-	-	-
SHexCer 35:0;3O	0.17394	5.53676e-06	1.29257	down	SHexCer	Sulfatide	-	-	C06125	-
PE O-18:2_20:1	0.171091	5.03033e-06	1.27409	down	EtherPE	Ether-linked phosphatidylethanolamine	LMGP02020056;LMGP02020074;LMGP02020075	-	C04475	52924991;52925009;52925010
SHexCer 40:2;3O	0.17036	9.53437e-05	1.32405	down	SHexCer	Sulfatide	-	-	C06125	-
PE O-18:2_22:3	0.170009	1.78866e-05	1.29129	down	EtherPE	Ether-linked phosphatidylethanolamine	LMGP02020084	-	C04475	52925019
TG O-20:3_16:0_20:4	0.169985	0.00799813	1.09633	down	EtherTG	Ether-linked triacylglycerol	-	-	-	-
PC 20:1_22:6	0.164977	3.58353e-08	1.32226	down	PC	Phosphatidylcholine	LMGP01011834;LMGP01011895;LMGP01011953;LMGP01012059;LMGP01012088;LMGP01012116	-	C00157	52923147;52923267;52923383;52923595;52923653;52923709
MGDG O-25:0_23:0	0.163306	0.00668176	1.11991	down	EtherMGDG	Ether-linked monogalactosyldiacylglycerol	-	-	-	-
MGDG O-28:2_18:1	0.163137	0.0110294	1.05995	down	EtherMGDG	Ether-linked monogalactosyldiacylglycerol	-	-	-	-
SM 42:1;2O	0.162153	6.25381e-07	1.31188	down	SM	Sphingomyelin	LMSP03010008;LMSP03010023	-	C00550	44260127;44260133
SPB 18:1;2O	0.16199	8.90062e-06	1.30653	down	Sph	Sphingosine	LMSP01010001	HMDB00252	C00319	5280335
SHexCer 37:3;2O	0.161955	0.000339709	1.31226	down	SHexCer	Sulfatide	-	-	C06125	-
SM 31:2;2O(FA 18:1)	0.161462	0.0160127	1.04063	down	ASM	Acylsphingomyelin	-	-	-	-
PC 40:2	0.156211	5.00073e-05	1.27966	down	PC	Phosphatidylcholine	LMGP01011021;LMGP01011036;LMGP01011038;LMGP01011042;LMGP01011043;LMGP01011594;LMGP01011611;LMGP01011636;LMGP01011854;LMGP01011988;LMGP01012016;LMGP01012046;LMGP01012142;LMGP01012158;LMGP01012166;LMGP01012220;LMGP01012221;LMGP01012239	HMDB08276;HMDB08308	C00157	24779046;24779061;24779063;24779067;24779068;52922667;52922701;52922751;52923187;52923453;52923509;52923569;53478691;53478745;53478769;53479177;53479495;53480677
HexCer 28:4;3O(FA 16:1)	0.154005	1.68094e-07	1.36536	down	HexCer_EOS	Hexosylceramide Esterified omega-hydroxy fatty acid-sphingosine	-	-	-	-
PE O-18:1_18:1	0.152065	5.05424e-09	1.3589	down	EtherPE	Ether-linked phosphatidylethanolamine	LMGP02020033;LMGP02020048	-	C04475	52924968;52924983
PC 18:1_20:1	0.151399	6.05282e-06	1.37555	down	PC	Phosphatidylcholine	LMGP01010788;LMGP01010789;LMGP01010790;LMGP01010791;LMGP01010792;LMGP01010793;LMGP01010843;LMGP01011296;LMGP01011472;LMGP01011495;LMGP01011575;LMGP01011607;LMGP01011630;LMGP01011774;LMGP01011817;LMGP01011846;LMGP01011962;LMGP01012011;LMGP01012041	HMDB08045;HMDB08270	C00157	24778847;24778848;24778849;24778850;24778851;24778852;24778897;24779263;52922426;52922471;52922629;52922693;52922739;52923027;52923113;52923171;52923401;52923499;52923559
PC 38:1	0.150225	2.8945e-05	1.31853	down	PC	Phosphatidylcholine	LMGP01010516;LMGP01010638;LMGP01010783;LMGP01010784;LMGP01010785;LMGP01010786;LMGP01010787;LMGP01010879;LMGP01010902;LMGP01011005;LMGP01011008;LMGP01011009;LMGP01011010;LMGP01011471;LMGP01011494;LMGP01011545;LMGP01011743;LMGP01011773;LMGP01011816;LMGP01011961;LMGP01011984;LMGP01012010	HMDB07894;HMDB07986;HMDB08044;HMDB08109;HMDB08268;HMDB08269	C00157	24778643;24778728;24778842;24778843;24778844;24778845;24778846;24778928;24778945;24779033;24779036;24779037;24779038;52922424;52922469;52922569;52922965;52923025;52923111;52923399;52923445;52923497
PC 22:6_22:6	0.149958	0.00246237	1.16822	down	PC	Phosphatidylcholine	LMGP01011119	HMDB08748	C00157	24779134
SM 42:2;2O	0.148911	4.20922e-06	1.33744	down	SM	Sphingomyelin	LMSP03010007;LMSP03010081	-	C00550	44260126;52931217
TG 18:1_19:1_19:1	0.145603	0.028269	1.02531	down	TG	Triacylglycerol	LMGL03010477;LMGL03010478;LMGL03010479;LMGL03010483;LMGL03010484;LMGL03010485;LMGL03010486;LMGL03010490;LMGL03010491;LMGL03010496;LMGL03010520;LMGL03010536;LMGL03010542;LMGL03010548;LMGL03010571;LMGL03010574;LMGL03010575;LMGL03010576;LMGL03010627;LMGL03010628;LMGL03010632;LMGL03010633;LMGL03010642;LMGL03010650;LMGL03010686;LMGL03010687;LMGL03010688;LMGL03010704;LMGL03010705;LMGL03013008;LMGL03013…	HMDB05410;HMDB05442;HMDB05454;HMDB05459	C00422	25240376;25240377;56936800;56936826;56936855;56937443;56937447;56937902;56938279;56938290;56938300;56938309;56938684;56938695;56938705;56939029;56939042;56939085;56939379;56939392;56939426;56939516;56939528;56939603;56939682;56939705;56939736;56939818;56939896;56939936;56940107;9544440;9544442;9544447;9544448;9544449;9544453;9544454;9544459;9544483;9544498;9544504;9544510;9544533;9544536;9544537;…
MGDG O-28:1_18:1	0.145121	0.0268157	1.02816	down	EtherMGDG	Ether-linked monogalactosyldiacylglycerol	-	-	-	-
SM 36:0;3O	0.14207	1.99575e-05	1.32308	down	SM	Sphingomyelin	-	-	C00550	-
Cer 18:1;2O/16:0;(2OH)	0.141697	4.77042e-07	1.37642	down	Cer_AS	Ceramide alpha-hydroxy fatty acid-sphingosine	LMSP02010068	-	-	70698955
MGDG O-8:0_22:2	0.141612	7.23759e-05	1.30965	down	EtherMGDG	Ether-linked monogalactosyldiacylglycerol	-	-	-	-
PC 18:1_22:6	0.140425	1.29227e-06	1.38719	down	PC	Phosphatidylcholine	LMGP01010847;LMGP01010913;LMGP01010946;LMGP01011669;LMGP01011698;LMGP01011859;LMGP01011889;LMGP01011918;LMGP01011946;LMGP01012080;LMGP01012081;LMGP01012108	HMDB08090;HMDB08123;HMDB08154	C00157	24778901;24778955;24778982;52922817;52922875;52923197;52923255;52923313;52923369;52923637;52923639;52923693
PC O-35:1	0.140106	0.000519858	1.28359	down	EtherPC	Ether-linked phosphatidylcholine	-	-	C05212	-
PC 20:3_20:3	0.138948	6.41508e-12	1.38654	down	PC	Phosphatidylcholine	LMGP01010821;LMGP01010823;LMGP01010846;LMGP01011639;LMGP01011728;LMGP01011828;LMGP01011858;LMGP01011888;LMGP01011917;LMGP01011945;LMGP01012051;LMGP01012079;LMGP01012107	HMDB08057;HMDB08089	C00157	24778876;24778878;24778900;52922757;52922935;52923135;52923195;52923253;52923311;52923367;52923579;52923635;52923691
PE O-16:0_22:1	0.138331	1.08578e-06	1.32719	down	EtherPE	Ether-linked phosphatidylethanolamine	LMGP02020035;LMGP02020054;LMGP02020072	-	C04475	52924970;52924989;52925007
PC 18:1_18:1	0.136628	1.97342e-06	1.40894	down	PC	Phosphatidylcholine	LMGP01010764;LMGP01010765;LMGP01010766;LMGP01010768;LMGP01010836;LMGP01010837;LMGP01010841;LMGP01010849;LMGP01010851;LMGP01010853;LMGP01010855;LMGP01010857;LMGP01010858;LMGP01010860;LMGP01010862;LMGP01010865;LMGP01010866;LMGP01010868;LMGP01010871;LMGP01010873;LMGP01010876;LMGP01010890;LMGP01010935;LMGP01010966;LMGP01011377;LMGP01011405;LMGP01011469;LMGP01011489;LMGP01011538;LMGP01011567;LMGP01011…	HMDB08039;HMDB08070;HMDB08135	C00157	10350317;10747839;15378085;24778826;24778827;24778828;24778890;24778891;24778895;24778903;24778905;24778907;24778909;24778911;24778912;24778914;24778916;24778919;24778920;24778922;24778924;24778926;42607426;52922236;52922292;52922420;52922459;52922555;52922613;52922953;52923009;52923103;52923161;52923491;52923551;53478629;53478721;53478765;53479167;6441487
LPC 36:1-SN1	0.135933	1.01239e-06	1.39253	down	LPC	Lysophophatidylcholine	-	-	C04230	-
PC 34:2	0.13556	5.11448e-05	1.30315	down	PC	Phosphatidylcholine	LMGP01010585;LMGP01010586;LMGP01010587;LMGP01010588;LMGP01010589;LMGP01010590;LMGP01010591;LMGP01010592;LMGP01010594;LMGP01010678;LMGP01010687;LMGP01010688;LMGP01010727;LMGP01010728;LMGP01010745;LMGP01010887;LMGP01010920;LMGP01010926;LMGP01010932;LMGP01011336;LMGP01011373;LMGP01011398;LMGP01011449;LMGP01011504;LMGP01011559;LMGP01011761;LMGP01011808;LMGP01011837;LMGP01012035;LMGP01012147	HMDB07973;HMDB08004;HMDB08005;HMDB08101;HMDB08133	C00157	14505457;16213884;24778693;24778694;24778695;24778696;24778697;24778759;24778766;24778767;24778802;24778803;24778812;24778935;24778962;24778966;24778972;5287971;52922154;52922228;52922278;52922380;52922489;52922597;52923001;52923095;52923153;52923547;53478719;6439299
LPC 38:4-SN1	0.135154	6.72089e-10	1.34891	down	LPC	Lysophophatidylcholine	-	-	C04230	-
PC 40:3	0.133644	3.76023e-07	1.38739	down	PC	Phosphatidylcholine	LMGP01010812;LMGP01011022;LMGP01011612;LMGP01011637;LMGP01011666;LMGP01011695;LMGP01011799;LMGP01011825;LMGP01011855;LMGP01011885;LMGP01011989;LMGP01011990;LMGP01012017;LMGP01012047;LMGP01012159;LMGP01012172;LMGP01012185;LMGP01012202;LMGP01012222;LMGP01012230	-	C00157	24778867;24779047;52922703;52922753;52922811;52922869;52923077;52923129;52923189;52923247;52923455;52923457;52923511;52923571;53478747;53478791;53478879;53478967;53479179;53479227
MGDG O-14:1_20:5	0.132745	0.000116466	1.3227	down	EtherMGDG	Ether-linked monogalactosyldiacylglycerol	-	-	-	-
PC 36:8	0.128696	0.000556509	1.25586	down	PC	Phosphatidylcholine	LMGP01010961;LMGP01010964;LMGP01011716	-	C00157	24778994;24778997;52922911
PE 36:2	0.128655	0.00041245	1.29476	down	PE	Phosphatidylethanolamine	LMGP02010039;LMGP02010044;LMGP02010052;LMGP02010109;LMGP02010420;LMGP02010448;LMGP02010510;LMGP02010530;LMGP02010578;LMGP02010607;LMGP02010774;LMGP02010802;LMGP02010848;LMGP02010877;LMGP02011043;LMGP02011073;LMGP02011193	HMDB08994;HMDB09059	C00350	52924125;52924153;52924213;52924233;52924279;52924308;52924475;52924503;52924549;52924578;52924744;52924774;52924894;9546744;9546749;9546757;9546810
TG 18:0_18:1_22:6	0.127792	0.0271403	1.0649	down	TG	Triacylglycerol	LMGL03011080;LMGL03011083;LMGL03011084;LMGL03011085;LMGL03011088;LMGL03011089;LMGL03011090;LMGL03011091;LMGL03011096;LMGL03011097;LMGL03011098;LMGL03011200;LMGL03011201;LMGL03011206;LMGL03011207;LMGL03011268;LMGL03011275;LMGL03011292;LMGL03011293;LMGL03011297;LMGL03011298;LMGL03011299;LMGL03011300;LMGL03011304;LMGL03011305;LMGL03011306;LMGL03011307;LMGL03011311;LMGL03011327;LMGL03011360;LMGL03011…	HMDB05471;HMDB10468	C00422	56936661;56936847;56936859;56936873;56936918;56938350;56938353;56938355;56938751;56938755;56938758;56939467;56939666;56939747;56939829;56939907;56939947;56939965;56940017;56940035;56940083;56940101;56940148;56940163;56940202;56940213;56940299;56940367;56940378;9545041;9545044;9545045;9545046;9545049;9545050;9545051;9545052;9545057;9545058;9545059;9545161;9545162;9545167;9545168;9545229;9545236;95…
HexCer 21:1;2O/13:0	0.126598	5.94602e-09	1.39066	down	HexCer_NS	Hexosylceramide non-hydroxyfatty acid-sphingosine	LMSP0501AA03;LMSP0501AA42;LMSP0501AA49;LMSP0501AC01	-	-	44260148;6321355;70699223;70699230
Cer 18:1;2O/18:3	0.126579	0.00454404	1.18635	down	Cer_NS	Ceramide non-hydroxyfatty acid-sphingosine	-	-	C00195	-
SM 11:1;2O/28:4	0.124141	0.00011219	1.3406	down	SM	Sphingomyelin	-	-	C00550	-
Cer 18:1;2O/16:0	0.123803	0.000158126	1.33287	down	Cer_NS	Ceramide non-hydroxyfatty acid-sphingosine	LMSP02010004;LMSP02010036;LMSP02010046	HMDB04949	C00195	10582678;11092732;5283564
LPC 28:0-SN1	0.123462	8.20508e-05	1.37732	down	LPC	Lysophophatidylcholine	-	-	C04230	-
PC 14:0_16:0	0.123155	2.76954e-09	1.44721	down	PC	Phosphatidylcholine	LMGP01010395;LMGP01010416;LMGP01010438;LMGP01010461;LMGP01010481;LMGP01010530;LMGP01010560;LMGP01010702;LMGP01010736;LMGP01010969;LMGP01010995;LMGP01011265	HMDB07869;HMDB07934;HMDB07965	C00157	129657;24778534;24778554;24778573;24778595;24778654;24778679;24778779;24778808;24779002;24779023;24779257
PE O-18:1_20:1	0.121391	1.72049e-10	1.45029	down	EtherPE	Ether-linked phosphatidylethanolamine	LMGP02020036;LMGP02020055;LMGP02020073	-	C04475	52924971;52924990;52925008
PE O-15:1_21:1	0.119039	1.29456e-11	1.45564	down	EtherPE	Ether-linked phosphatidylethanolamine	LMGP02020033;LMGP02020048	-	C04475	52924968;52924983
LPC 36:6-SN2	0.119018	0.0001099	1.35764	down	LPC	Lysophophatidylcholine	-	-	C04230	-
PE O-18:1_20:2	0.113941	5.94337e-08	1.46793	down	EtherPE	Ether-linked phosphatidylethanolamine	LMGP02020056;LMGP02020074;LMGP02020075	-	C04475	52924991;52925009;52925010
PC O-40:9	0.113772	7.10763e-06	1.39588	down	EtherPC	Ether-linked phosphatidylcholine	-	-	C05212	-
MGDG O-21:1_25:0	0.113343	0.0256057	1.11863	down	EtherMGDG	Ether-linked monogalactosyldiacylglycerol	-	-	-	-
PC 21:1_21:1	0.113038	8.02091e-05	1.38577	down	PC	Phosphatidylcholine	LMGP01010665;LMGP01011203;LMGP01011803;LMGP01011831;LMGP01011861;LMGP01011995;LMGP01012024;LMGP01012054;LMGP01012162;LMGP01012167;LMGP01012173;LMGP01012189;LMGP01012227;LMGP01012237;LMGP01012241;LMGP01012242	-	C00157	24778751;24779213;52923085;52923141;52923201;52923467;52923525;52923585;53478755;53478775;53478795;53478901;53479189;53479441;53479499;53479501
HexCer 16:1;2O/18:0;O	0.112701	2.64323e-08	1.43436	down	HexCer_HS	Hexosylceramide hydroxyfatty acid-sphingosine	LMSP0501AA65	-	-	70699246
LPC 34:0-SN1	0.111398	2.02402e-05	1.42181	down	LPC	Lysophophatidylcholine	-	-	C04230	-
SM 44:5;3O	0.109746	3.04553e-06	1.4265	down	SM	Sphingomyelin	-	-	C00550	-
MGDG O-28:3_18:1	0.108153	0.0252426	1.11853	down	EtherMGDG	Ether-linked monogalactosyldiacylglycerol	-	-	-	-
PE O-16:1_22:1	0.108014	3.86317e-06	1.37235	down	EtherPE	Ether-linked phosphatidylethanolamine	LMGP02020036;LMGP02020055;LMGP02020073	-	C04475	52924971;52924990;52925008
SM 34:0;2O	0.107455	2.76311e-07	1.43338	down	SM	Sphingomyelin	LMSP03010004	-	C00550	9939965
LPC 34:1-SN1	0.103689	2.1585e-07	1.51713	down	LPC	Lysophophatidylcholine	-	-	C04230	-
HexCer 18:1;2O/16:0	0.101732	2.20054e-08	1.46492	down	HexCer_NS	Hexosylceramide non-hydroxyfatty acid-sphingosine	LMSP0501AA03;LMSP0501AA42;LMSP0501AA49;LMSP0501AC01	-	-	44260148;6321355;70699223;70699230
LPC 32:1	0.101421	2.94077e-05	1.43754	down	LPC	Lysophophatidylcholine	-	-	C04230	-
CAR 18:0	0.101402	1.29426e-06	1.48114	down	CAR	Acylcarnitine	LMFA07070008;LMFA07070051	HMDB00848	C02301	52922056;6426855
PC 20:1_20:1	0.100884	4.30461e-07	1.5193	down	PC	Phosphatidylcholine	LMGP01011021;LMGP01011036;LMGP01011038;LMGP01011042;LMGP01011043;LMGP01011594;LMGP01011611;LMGP01011636;LMGP01011854;LMGP01011988;LMGP01012016;LMGP01012046;LMGP01012142;LMGP01012158;LMGP01012166;LMGP01012220;LMGP01012221;LMGP01012239	HMDB08276;HMDB08308	C00157	24779046;24779061;24779063;24779067;24779068;52922667;52922701;52922751;52923187;52923453;52923509;52923569;53478691;53478745;53478769;53479177;53479495;53480677
MGDG O-9:0_18:4	0.100223	9.92339e-07	1.45676	down	EtherMGDG	Ether-linked monogalactosyldiacylglycerol	-	-	-	-
PC O-40:7	0.0982912	6.72464e-08	1.49657	down	EtherPC	Ether-linked phosphatidylcholine	-	-	C05212	-
PE O-18:2_22:6	0.0869853	9.22447e-05	1.51703	down	EtherPE	Ether-linked phosphatidylethanolamine	-	-	C04475	-
MGDG O-28:0_20:3	0.0851752	0.00257415	1.31529	down	EtherMGDG	Ether-linked monogalactosyldiacylglycerol	-	-	-	-
MGDG O-22:6_7:0	0.082995	0.0002996	1.40218	down	EtherMGDG	Ether-linked monogalactosyldiacylglycerol	-	-	-	-
LPC 40:6-SN2	0.0765833	0.000218031	1.50516	down	LPC	Lysophophatidylcholine	-	-	C04230	-
PC 36:2	0.0760897	0.000223948	1.4745	down	PC	Phosphatidylcholine	LMGP01010764;LMGP01010765;LMGP01010766;LMGP01010768;LMGP01010836;LMGP01010837;LMGP01010841;LMGP01010849;LMGP01010851;LMGP01010853;LMGP01010855;LMGP01010857;LMGP01010858;LMGP01010860;LMGP01010862;LMGP01010865;LMGP01010866;LMGP01010868;LMGP01010871;LMGP01010873;LMGP01010876;LMGP01010890;LMGP01010935;LMGP01010966;LMGP01011377;LMGP01011405;LMGP01011469;LMGP01011489;LMGP01011538;LMGP01011567;LMGP01011…	HMDB08039;HMDB08070;HMDB08135	C00157	10350317;10747839;15378085;24778826;24778827;24778828;24778890;24778891;24778895;24778903;24778905;24778907;24778909;24778911;24778912;24778914;24778916;24778919;24778920;24778922;24778924;24778926;42607426;52922236;52922292;52922420;52922459;52922555;52922613;52922953;52923009;52923103;52923161;52923491;52923551;53478629;53478721;53478765;53479167;6441487
PC O-16:0_18:1	0.0751445	1.76943e-07	1.62393	down	EtherPC	Ether-linked phosphatidylcholine	-	-	C05212	-
LPC 32:0-SN1	0.0741104	1.8987e-07	1.62001	down	LPC	Lysophophatidylcholine	-	-	C04230	-
MGDG O-16:2_5:0	0.0715261	1.29384e-05	1.58418	down	EtherMGDG	Ether-linked monogalactosyldiacylglycerol	-	-	-	-
SMGDG O-11:0_28:6	0.0667234	1.60278e-08	1.6519	down	EtherSMGDG	Semino lipid	-	-	-	-
PE 38:4	0.0623109	3.17285e-05	1.65122	down	PE	Phosphatidylethanolamine	LMGP02010114;LMGP02010115;LMGP02010116;LMGP02010118;LMGP02010129;LMGP02010648;LMGP02010671;LMGP02010699;LMGP02010727;LMGP02010757;LMGP02010855;LMGP02010856;LMGP02010884;LMGP02010914;LMGP02010943;LMGP02011108	HMDB08943;HMDB09003;HMDB09067;HMDB09228	C00350	5289133;52924349;52924372;52924400;52924428;52924458;52924556;52924557;52924585;52924615;52924644;52924809;9546815;9546816;9546817;9546829
LDGCC 40:6	0.0606524	1.15608e-11	1.67241	down	LDGCC	Lysodiacylglyceryl-3-O-carboxyhydroxymethylcholine	-	-	-	-
PC O-18:1_18:1	0.0576819	3.05996e-08	1.70446	down	EtherPC	Ether-linked phosphatidylcholine	-	-	C05212	-
LPC 36:2-SN1	0.0560971	4.78806e-06	1.71966	down	LPC	Lysophophatidylcholine	-	-	C04230	-
PE O-18:2_22:5	0.0510845	5.21948e-07	1.74204	down	EtherPE	Ether-linked phosphatidylethanolamine	-	-	C04475	-
CAR 16:0	0.0353302	1.78143e-05	1.787	down	CAR	Acylcarnitine	LMFA07070004;LMFA07070079;LMFA07070098	HMDB00222	C02301;C02990	11953816;16902;461
CAR 18:1	0.0298626	6.10442e-08	1.8646	down	CAR	Acylcarnitine	LMFA07070063;LMFA07070096	HMDB06464	C02301	53477837;6441392
LPC 30:0-SN1	0.0245587	1.55261e-09	1.90293	down	LPC	Lysophophatidylcholine	-	-	C04230	-
PS 18:0_22:6	0.0199273	1.94711e-05	1.82679	down	PS	Phosphatidylserine	LMGP03010040;LMGP03010365;LMGP03010453;LMGP03010551;LMGP03010581;LMGP03010611;LMGP03010640;LMGP03010667;LMGP03010772;LMGP03010800;LMGP03010827	HMDB10167	C02737	24779546;52925475;52925563;52925661;52925691;52925721;52925750;52925777;52925882;52925910;52925937

## Sheet: Table S4
Table S4Summary of sequencing analysis in RNA-seq
	Raw Data		Valid Data		Valid Ratio(reads)	Q20%	Q30%	GC content%
	Read	Base	Read	Base
D0_1	52140624	7.82G	49522568	7.43G	94.98	99.97	98.22	51.5
D0_2	51782444	7.77G	49288856	7.39G	95.18	99.96	98.24	52
D0_3	51154134	7.67G	48962052	7.34G	95.71	99.97	98.5	51.5
D10_1	50207124	7.53G	47885842	7.18G	95.38	99.97	98.34	50
D10_2	42755316	6.41G	40765112	6.11G	95.35	99.98	98.42	50
D10_3	49078130	7.36G	46830314	7.02G	95.42	99.98	98.45	50

## Sheet: Table S5
Table S5 The data for the sequencing reads that mapped to the reference genome in RNA-seq.
Sample	Valid reads	Mapped reads	Unique Mapped reads	Multi Mapped reads	PE Mapped reads	Reads map to sense strand	Reads map to antisense strand	Non-splice reads	Splice reads
D0_1	49522568	47733600(96.39%)	36932598(74.58%)	10801002(21.81%)	38703560(78.15%)	22638462(45.71%)	22693550(45.82%)	23569494(47.59%)	21762518(43.94%)
D0_2	49288856	47466992(96.30%)	37073836(75.22%)	10393156(21.09%)	37393546(75.87%)	22498412(45.65%)	22557264(45.77%)	23131431(46.93%)	21924245(44.48%)
D0_3	48962052	47302897(96.61%)	36910189(75.39%)	10392708(21.23%)	37816784(77.24%)	22411083(45.77%)	22448866(45.85%)	23208770(47.40%)	21651179(44.22%)
D10_1	47885842	46256607(96.60%)	33742841(70.47%)	12513766(26.13%)	36835984(76.92%)	20483104(42.77%)	20529167(42.87%)	22584902(47.16%)	18427369(38.48%)
D10_2	40765112	39261540(96.31%)	28974884(71.08%)	10286656(25.23%)	30900366(75.80%)	17626934(43.24%)	17646452(43.29%)	19542622(47.94%)	15730764(38.59%)
D10_3	46830314	45194210(96.51%)	32703706(69.83%)	12490504(26.67%)	35327422(75.44%)	19865645(42.42%)	19890457(42.47%)	22194296(47.39%)	17561806(37.50%)

## Sheet: Table S6
Table S6 The seven pathways enriched in both datasets.
pathway name	p-value (RNA-seq)	p-value (lipid)
Adipocytokine signaling pathway	0.0260016	0.000509093
AGE-RAGE signaling pathway in diabetic complications	5.96472e-05	0.001081
Glycerolipid metabolism	0.0208235	2.28497e-05
Insulin resistance	0.0025735	0.000121194
Oxidative phosphorylation	2.31768e-20	0.00283056
Regulation of lipolysis in adipocytes	1.34733e-06	0.00248428
Retrograde endocannabinoid signaling	9.40221e-06	0.000103347

## Sheet: Table S7
Table S7 The correlation between DEG and differentially expressed lipid metabolites generated using Pearson’s correlation coefficient.
lipid metabolites	rho	pvalue	relation
Cer 18:1;2O/20:0	1	0.00277778	positive
PC 14:0_16:1	1	0.00277778	positive
TG 10:0_14:0_16:0	1	0.00277778	positive
PE 13:1_20:1	1	0.00277778	positive
PC 13:0_16:1	1	0.00277778	positive
PE 16:0_18:1	1	0.00277778	positive
TG 10:0_14:1_18:1	1	0.00277778	positive
PE 16:0_16:1	1	0.00277778	positive
PE 15:1_16:1	1	0.00277778	positive
Cer 17:1;2O/20:0	1	0.00277778	positive
PC 12:0_16:1	1	0.00277778	positive
PE 16:0_18:1	1	0.00277778	positive
TG 10:0_14:1_18:1	1	0.00277778	positive
TG 10:0_14:1_18:1	1	0.00277778	positive
DG 13:0_16:1	1	0.00277778	positive
TG 10:0_10:0_18:0	1	0.00277778	positive
MGDG 16:0_13:1	1	0.00277778	positive
Cer 18:1;2O/17:0	1	0.00277778	positive
PE 16:0_18:1	1	0.00277778	positive
PE 16:0_18:1	1	0.00277778	positive
MGDG 16:0_13:1	1	0.00277778	positive
Cer 18:1;2O/17:0	1	0.00277778	positive
TG 10:0_13:0_16:0	0.942857	0.0166667	positive
PE 14:0_16:1	0.942857	0.0166667	positive
PC 14:0_17:1	0.942857	0.0166667	positive
PC 13:0_13:0	0.942857	0.0166667	positive
TG 10:0_14:1_18:1	0.942857	0.0166667	positive
PE 15:1_16:1	0.942857	0.0166667	positive
Cer 17:1;2O/20:0	0.942857	0.0166667	positive
PC 12:0_16:1	0.942857	0.0166667	positive
TG 10:0_14:1_18:1	0.942857	0.0166667	positive
PE 15:1_16:1	0.942857	0.0166667	positive
Cer 17:1;2O/20:0	0.942857	0.0166667	positive
PC 12:0_16:1	0.942857	0.0166667	positive
TG 10:0_14:0_16:0	0.942857	0.0166667	positive
PE 13:1_20:1	0.942857	0.0166667	positive
PE 16:0_18:1	0.942857	0.0166667	positive
PC 13:0_16:1	0.942857	0.0166667	positive
Cer 18:1;2O/18:3	0.942857	0.0166667	positive
PC 14:0_16:0	0.942857	0.0166667	positive
TG 10:0_13:0_16:0	0.942857	0.0166667	positive
PC 13:0_13:0	0.942857	0.0166667	positive
PC 14:0_17:1	0.942857	0.0166667	positive
MGDG 16:0_13:1	0.942857	0.0166667	positive
DG 13:0_16:1	0.942857	0.0166667	positive
TG 10:0_10:0_18:0	0.942857	0.0166667	positive
TG 10:0_11:0_16:0	0.942857	0.0166667	positive
TG 10:0_11:0_18:1	0.942857	0.0166667	positive
Cer 18:1;2O/17:0	0.942857	0.0166667	positive
MGDG 16:0_13:1	0.942857	0.0166667	positive
PE 16:0_18:1	0.942857	0.0166667	positive
Cer 18:1;2O/17:0	0.942857	0.0166667	positive
PC 40:3	0.942857	0.0166667	positive
TG 10:0_14:0_16:0	0.942857	0.0166667	positive
PE 13:1_20:1	0.942857	0.0166667	positive
PC 13:0_16:1	0.942857	0.0166667	positive
PC 13:0_13:0	0.942857	0.0166667	positive
TG 10:0_13:0_16:0	0.942857	0.0166667	positive
PC 13:0_13:0	0.942857	0.0166667	positive
PC 14:0_17:1	0.942857	0.0166667	positive
DG 10:0_16:1	0.942857	0.0166667	positive
DG 12:0_16:1	0.942857	0.0166667	positive
DG 14:0_14:0	0.942857	0.0166667	positive
PE 16:0_18:1	0.942857	0.0166667	positive
Cer 18:1;2O/18:3	0.942857	0.0166667	positive
TG 10:0_13:0_16:0	0.942857	0.0166667	positive
PC 13:0_13:0	0.942857	0.0166667	positive
PC 14:0_17:1	0.942857	0.0166667	positive
PE 16:0_16:1	0.942857	0.0166667	positive
PC 13:0_13:0	0.942857	0.0166667	positive
PE 16:0_16:1	0.942857	0.0166667	positive
PC 13:0_13:0	0.942857	0.0166667	positive
PC 13:0_13:0	0.942857	0.0166667	positive
DG 10:0_16:1	0.942857	0.0166667	positive
DG 12:0_16:1	0.942857	0.0166667	positive
DG 14:0_14:0	0.942857	0.0166667	positive
PE 16:0_18:1	0.942857	0.0166667	positive
Cer 18:1;2O/18:3	0.942857	0.0166667	positive
PC 13:0_13:0	0.942857	0.0166667	positive
PE 16:0_16:1	0.942857	0.0166667	positive
PC 13:0_13:0	0.942857	0.0166667	positive
PC 40:3	0.942857	0.0166667	positive
TG 10:0_14:1_18:1	0.885714	0.0333333	positive
DG 10:0_16:1	0.885714	0.0333333	positive
DG 12:0_16:1	0.885714	0.0333333	positive
DG 13:0_16:1	0.885714	0.0333333	positive
DG 14:0_14:0	0.885714	0.0333333	positive
TG 10:0_10:0_18:0	0.885714	0.0333333	positive
TG 10:0_14:1_18:1	0.885714	0.0333333	positive
TG 10:0_13:0_16:0	0.885714	0.0333333	positive
PE 15:1_16:1	0.885714	0.0333333	positive
Cer 17:1;2O/20:0	0.885714	0.0333333	positive
PC 12:0_16:1	0.885714	0.0333333	positive
PC 13:0_13:0	0.885714	0.0333333	positive
PC 14:0_17:1	0.885714	0.0333333	positive
TG 10:0_13:0_16:0	0.885714	0.0333333	positive
PE 15:1_16:1	0.885714	0.0333333	positive
Cer 17:1;2O/20:0	0.885714	0.0333333	positive
PC 12:0_16:1	0.885714	0.0333333	positive
PC 13:0_13:0	0.885714	0.0333333	positive
PC 14:0_17:1	0.885714	0.0333333	positive
TG 10:0_14:0_16:0	0.885714	0.0333333	positive
PE 13:1_20:1	0.885714	0.0333333	positive
PE 16:0_18:1	0.885714	0.0333333	positive
PC 13:0_16:1	0.885714	0.0333333	positive
PE 15:1_16:1	0.885714	0.0333333	positive
Cer 17:1;2O/20:0	0.885714	0.0333333	positive
PC 12:0_16:1	0.885714	0.0333333	positive
PC 40:3	0.885714	0.0333333	positive
PC 40:3	0.885714	0.0333333	positive
Cer 18:1;2O/16:0	0.885714	0.0333333	positive
DG 10:0_16:1	0.885714	0.0333333	positive
DG 12:0_16:1	0.885714	0.0333333	positive
DG 14:0_14:0	0.885714	0.0333333	positive
Cer 18:1;2O/18:3	0.885714	0.0333333	positive
MGDG 16:0_13:1	0.885714	0.0333333	positive
Cer 18:1;2O/17:0	0.885714	0.0333333	positive
Cer 18:1;2O/20:0	0.885714	0.0333333	positive
PC 14:0_16:1	0.885714	0.0333333	positive
PC 13:0_13:0	0.885714	0.0333333	positive
PE 16:0_16:1	0.885714	0.0333333	positive
Cer 18:1;2O/18:3	0.885714	0.0333333	positive
Cer 18:1;2O/18:3	0.885714	0.0333333	positive
PC 40:3	0.885714	0.0333333	positive
DG 10:0_16:1	0.885714	0.0333333	positive
DG 12:0_16:1	0.885714	0.0333333	positive
DG 14:0_14:0	0.885714	0.0333333	positive
DG 10:0_16:1	0.885714	0.0333333	positive
DG 12:0_16:1	0.885714	0.0333333	positive
DG 13:0_16:1	0.885714	0.0333333	positive
DG 14:0_14:0	0.885714	0.0333333	positive
TG 10:0_10:0_18:0	0.885714	0.0333333	positive
TG 10:0_14:1_18:1	0.885714	0.0333333	positive
MGDG 16:0_13:1	0.885714	0.0333333	positive
Cer 18:1;2O/17:0	0.885714	0.0333333	positive
Cer 18:1;2O/20:0	0.885714	0.0333333	positive
PC 14:0_16:1	0.885714	0.0333333	positive
MGDG 16:0_13:1	0.885714	0.0333333	positive
Cer 18:1;2O/17:0	0.885714	0.0333333	positive
Cer 18:1;2O/20:0	0.885714	0.0333333	positive
PC 14:0_16:1	0.885714	0.0333333	positive
MGDG 16:0_13:1	0.885714	0.0333333	positive
TG 10:0_11:0_16:0	0.885714	0.0333333	positive
TG 10:0_11:0_18:1	0.885714	0.0333333	positive
Cer 18:1;2O/17:0	0.885714	0.0333333	positive
DG 13:0_16:1	0.885714	0.0333333	positive
TG 10:0_10:0_18:0	0.885714	0.0333333	positive
TG 10:0_14:1_18:1	0.885714	0.0333333	positive
DG 10:0_16:1	0.885714	0.0333333	positive
DG 12:0_16:1	0.885714	0.0333333	positive
DG 14:0_14:0	0.885714	0.0333333	positive
DG 10:0_16:1	0.885714	0.0333333	positive
DG 12:0_16:1	0.885714	0.0333333	positive
DG 13:0_16:1	0.885714	0.0333333	positive
DG 14:0_14:0	0.885714	0.0333333	positive
TG 10:0_10:0_18:0	0.885714	0.0333333	positive
TG 10:0_14:1_18:1	0.885714	0.0333333	positive
DG 10:0_16:1	0.885714	0.0333333	positive
DG 12:0_16:1	0.885714	0.0333333	positive
DG 14:0_14:0	0.885714	0.0333333	positive
Cer 18:1;2O/18:3	0.885714	0.0333333	positive
DG 10:0_16:1	0.885714	0.0333333	positive
DG 12:0_16:1	0.885714	0.0333333	positive
DG 13:0_16:1	0.885714	0.0333333	positive
DG 14:0_14:0	0.885714	0.0333333	positive
TG 10:0_10:0_18:0	0.885714	0.0333333	positive
TG 10:0_14:1_18:1	0.885714	0.0333333	positive
DG 13:0_16:1	0.885714	0.0333333	positive
TG 10:0_10:0_18:0	0.885714	0.0333333	positive
TG 10:0_14:1_18:1	0.885714	0.0333333	positive
Cer 18:1;2O/16:0	0.880406	0.0205987	positive
Cer 18:1;2O/18:3	0.880406	0.0205987	positive
MGDG 16:0_13:1	0.828571	0.0583333	positive
TG 10:0_11:0_16:0	0.828571	0.0583333	positive
TG 10:0_11:0_18:1	0.828571	0.0583333	positive
TG 10:0_14:0_16:0	0.828571	0.0583333	positive
PE 13:1_20:1	0.828571	0.0583333	positive
Cer 18:1;2O/17:0	0.828571	0.0583333	positive
PC 13:0_16:1	0.828571	0.0583333	positive
MGDG 16:0_13:1	0.828571	0.0583333	positive
PE 16:0_18:1	0.828571	0.0583333	positive
Cer 18:1;2O/17:0	0.828571	0.0583333	positive
PE 16:0_18:1	0.828571	0.0583333	positive
Cer 18:1;2O/20:0	0.828571	0.0583333	positive
PC 14:0_16:1	0.828571	0.0583333	positive
DG 10:0_16:1	0.828571	0.0583333	positive
DG 12:0_16:1	0.828571	0.0583333	positive
DG 14:0_14:0	0.828571	0.0583333	positive
TG 10:0_14:1_18:1	0.828571	0.0583333	positive
MGDG 16:0_13:1	0.828571	0.0583333	positive
TG 10:0_14:0_16:0	0.828571	0.0583333	positive
PE 13:1_20:1	0.828571	0.0583333	positive
Cer 18:1;2O/17:0	0.828571	0.0583333	positive
PC 13:0_16:1	0.828571	0.0583333	positive
DG 13:0_16:1	0.828571	0.0583333	positive
TG 10:0_10:0_18:0	0.828571	0.0583333	positive
PE 14:0_16:1	0.828571	0.0583333	positive
PC 13:0_13:0	0.828571	0.0583333	positive
PC 14:0_16:0	0.828571	0.0583333	positive
PC 40:3	0.828571	0.0583333	positive
TG 10:0_13:0_16:0	0.828571	0.0583333	positive
PE 15:0_16:1	0.828571	0.0583333	positive
PC 14:0_17:1	0.828571	0.0583333	positive
PC 14:0_16:0	0.828571	0.0583333	positive
PC 40:3	0.828571	0.0583333	positive
MGDG 16:0_13:1	0.828571	0.0583333	positive
TG 10:0_14:0_16:0	0.828571	0.0583333	positive
PE 13:1_20:1	0.828571	0.0583333	positive
Cer 18:1;2O/17:0	0.828571	0.0583333	positive
PC 13:0_16:1	0.828571	0.0583333	positive
MGDG 16:0_13:1	0.828571	0.0583333	positive
PE 16:0_18:1	0.828571	0.0583333	positive
Cer 18:1;2O/17:0	0.828571	0.0583333	positive
DG 13:0_16:1	0.828571	0.0583333	positive
TG 10:0_10:0_18:0	0.828571	0.0583333	positive
PE 15:0_16:1	0.828571	0.0583333	positive
PE 15:1_16:1	0.828571	0.0583333	positive
Cer 17:1;2O/20:0	0.828571	0.0583333	positive
PC 12:0_16:1	0.828571	0.0583333	positive
PC 13:0_13:0	0.828571	0.0583333	positive
Cer 18:1;2O/16:0	0.828571	0.0583333	positive
DG 13:0_16:1	0.828571	0.0583333	positive
TG 10:0_10:0_18:0	0.828571	0.0583333	positive
DG 10:0_16:1	0.828571	0.0583333	positive
DG 12:0_16:1	0.828571	0.0583333	positive
DG 14:0_14:0	0.828571	0.0583333	positive
TG 10:0_14:1_18:1	0.828571	0.0583333	positive
TG 10:0_11:0_16:0	0.828571	0.0583333	positive
TG 10:0_11:0_18:1	0.828571	0.0583333	positive
PE 16:0_18:1	0.828571	0.0583333	positive
Cer 18:1;2O/20:0	0.828571	0.0583333	positive
PC 14:0_16:1	0.828571	0.0583333	positive
MGDG 16:0_13:1	0.828571	0.0583333	positive
TG 10:0_14:0_16:0	0.828571	0.0583333	positive
PE 13:1_20:1	0.828571	0.0583333	positive
Cer 18:1;2O/17:0	0.828571	0.0583333	positive
PC 13:0_16:1	0.828571	0.0583333	positive
MGDG 16:0_13:1	0.828571	0.0583333	positive
PE 16:0_18:1	0.828571	0.0583333	positive
Cer 18:1;2O/17:0	0.828571	0.0583333	positive
MGDG 16:0_13:1	0.828571	0.0583333	positive
TG 10:0_14:0_16:0	0.828571	0.0583333	positive
PE 13:1_20:1	0.828571	0.0583333	positive
Cer 18:1;2O/17:0	0.828571	0.0583333	positive
PC 13:0_16:1	0.828571	0.0583333	positive
PE 15:0_16:1	0.828571	0.0583333	positive
PE 15:1_16:1	0.828571	0.0583333	positive
Cer 17:1;2O/20:0	0.828571	0.0583333	positive
PC 12:0_16:1	0.828571	0.0583333	positive
PC 13:0_13:0	0.828571	0.0583333	positive
Cer 18:1;2O/16:0	0.828571	0.0583333	positive
PC 14:0_16:0	0.828571	0.0583333	positive
PC 40:3	0.828571	0.0583333	positive
MGDG 16:0_13:1	0.828571	0.0583333	positive
PE 16:0_18:1	0.828571	0.0583333	positive
Cer 18:1;2O/17:0	0.828571	0.0583333	positive
TG 10:0_11:0_16:0	0.828571	0.0583333	positive
TG 10:0_11:0_18:1	0.828571	0.0583333	positive
PE 16:0_18:1	0.828571	0.0583333	positive
Cer 18:1;2O/20:0	0.828571	0.0583333	positive
PC 14:0_16:1	0.828571	0.0583333	positive
PE 15:1_16:1	0.771429	0.102778	positive
PE 16:0_16:1	0.771429	0.102778	positive
Cer 17:1;2O/20:0	0.771429	0.102778	positive
PC 12:0_16:1	0.771429	0.102778	positive
PC 13:0_13:0	0.771429	0.102778	positive
TG 10:0_13:0_16:0	0.771429	0.102778	positive
PE 15:0_16:1	0.771429	0.102778	positive
PE 15:1_16:1	0.771429	0.102778	positive
PE 16:0_16:1	0.771429	0.102778	positive
Cer 17:1;2O/20:0	0.771429	0.102778	positive
PC 12:0_16:1	0.771429	0.102778	positive
PC 14:0_17:1	0.771429	0.102778	positive
MGDG 16:0_13:1	0.771429	0.102778	positive
DG 10:0_16:1	0.771429	0.102778	positive
DG 12:0_16:1	0.771429	0.102778	positive
DG 13:0_16:1	0.771429	0.102778	positive
DG 14:0_14:0	0.771429	0.102778	positive
TG 10:0_10:0_18:0	0.771429	0.102778	positive
TG 10:0_14:0_16:0	0.771429	0.102778	positive
PE 13:1_20:1	0.771429	0.102778	positive
PE 16:0_18:1	0.771429	0.102778	positive
Cer 18:1;2O/17:0	0.771429	0.102778	positive
Cer 18:1;2O/20:0	0.771429	0.102778	positive
PC 13:0_16:1	0.771429	0.102778	positive
PC 14:0_16:1	0.771429	0.102778	positive
TG 10:0_13:0_16:0	0.771429	0.102778	positive
PE 14:0_16:1	0.771429	0.102778	positive
PE 15:0_16:1	0.771429	0.102778	positive
PC 14:0_17:1	0.771429	0.102778	positive
MGDG 16:0_13:1	0.771429	0.102778	positive
DG 10:0_16:1	0.771429	0.102778	positive
DG 12:0_16:1	0.771429	0.102778	positive
DG 13:0_16:1	0.771429	0.102778	positive
DG 14:0_14:0	0.771429	0.102778	positive
TG 10:0_10:0_18:0	0.771429	0.102778	positive
TG 10:0_14:0_16:0	0.771429	0.102778	positive
PE 13:1_20:1	0.771429	0.102778	positive
PE 16:0_18:1	0.771429	0.102778	positive
Cer 18:1;2O/17:0	0.771429	0.102778	positive
Cer 18:1;2O/20:0	0.771429	0.102778	positive
PC 13:0_16:1	0.771429	0.102778	positive
PC 14:0_16:1	0.771429	0.102778	positive
TG 10:0_13:0_16:0	0.771429	0.102778	positive
PE 15:0_16:1	0.771429	0.102778	positive
PC 13:0_13:0	0.771429	0.102778	positive
PC 14:0_17:1	0.771429	0.102778	positive
MGDG 16:0_13:1	0.771429	0.102778	positive
DG 10:0_16:1	0.771429	0.102778	positive
DG 12:0_16:1	0.771429	0.102778	positive
DG 14:0_14:0	0.771429	0.102778	positive
TG 10:0_14:1_18:1	0.771429	0.102778	positive
Cer 18:1;2O/17:0	0.771429	0.102778	positive
Cer 18:1;2O/20:0	0.771429	0.102778	positive
PC 14:0_16:1	0.771429	0.102778	positive
Cer 18:1;2O/16:1	0.771429	0.102778	positive
Cer 18:1;2O/16:1	0.771429	0.102778	positive
PC 40:3	0.771429	0.102778	positive
PE 15:0_16:1	0.771429	0.102778	positive
PE 15:1_16:1	0.771429	0.102778	positive
PE 16:0_16:1	0.771429	0.102778	positive
Cer 17:1;2O/20:0	0.771429	0.102778	positive
PC 12:0_16:1	0.771429	0.102778	positive
PC 13:0_13:0	0.771429	0.102778	positive
Cer 18:1;2O/18:3	0.771429	0.102778	positive
PC 40:3	0.771429	0.102778	positive
Cer 18:1;2O/16:0	0.771429	0.102778	positive
PE 14:0_16:1	0.771429	0.102778	positive
PE 15:1_16:1	0.771429	0.102778	positive
PE 16:0_16:1	0.771429	0.102778	positive
Cer 17:1;2O/20:0	0.771429	0.102778	positive
PC 12:0_16:1	0.771429	0.102778	positive
DG 10:0_16:1	0.771429	0.102778	positive
DG 12:0_16:1	0.771429	0.102778	positive
DG 14:0_14:0	0.771429	0.102778	positive
TG 10:0_14:1_18:1	0.771429	0.102778	positive
PE 16:0_18:1	0.771429	0.102778	positive
Cer 18:1;2O/20:0	0.771429	0.102778	positive
PC 14:0_16:1	0.771429	0.102778	positive
DG 10:0_16:1	0.771429	0.102778	positive
DG 12:0_16:1	0.771429	0.102778	positive
DG 13:0_16:1	0.771429	0.102778	positive
DG 14:0_14:0	0.771429	0.102778	positive
TG 10:0_10:0_18:0	0.771429	0.102778	positive
TG 10:0_11:0_16:0	0.771429	0.102778	positive
TG 10:0_11:0_18:1	0.771429	0.102778	positive
TG 10:0_14:0_16:0	0.771429	0.102778	positive
TG 10:0_14:1_18:1	0.771429	0.102778	positive
PE 13:1_20:1	0.771429	0.102778	positive
Cer 18:1;2O/20:0	0.771429	0.102778	positive
PC 13:0_16:1	0.771429	0.102778	positive
PC 14:0_16:1	0.771429	0.102778	positive
Cer 18:1;2O/16:0	0.771429	0.102778	positive
Cer 18:1;2O/18:3	0.771429	0.102778	positive
PC 14:0_16:0	0.771429	0.102778	positive
DG 10:0_16:1	0.771429	0.102778	positive
DG 12:0_16:1	0.771429	0.102778	positive
DG 14:0_14:0	0.771429	0.102778	positive
TG 10:0_14:1_18:1	0.771429	0.102778	positive
PE 16:0_18:1	0.771429	0.102778	positive
Cer 18:1;2O/20:0	0.771429	0.102778	positive
PC 14:0_16:1	0.771429	0.102778	positive
Cer 18:1;2O/16:0	0.771429	0.102778	positive
Cer 18:1;2O/16:1	0.771429	0.102778	positive
Cer 18:1;2O/18:3	0.771429	0.102778	positive
PC 14:0_16:0	0.771429	0.102778	positive
PC 40:3	0.771429	0.102778	positive
PE 15:0_16:1	0.771429	0.102778	positive
PE 15:1_16:1	0.771429	0.102778	positive
PE 16:0_16:1	0.771429	0.102778	positive
Cer 17:1;2O/20:0	0.771429	0.102778	positive
PC 12:0_16:1	0.771429	0.102778	positive
PC 13:0_13:0	0.771429	0.102778	positive
TG 10:0_13:0_16:0	0.771429	0.102778	positive
PE 15:0_16:1	0.771429	0.102778	positive
PE 15:1_16:1	0.771429	0.102778	positive
PE 16:0_16:1	0.771429	0.102778	positive
Cer 17:1;2O/20:0	0.771429	0.102778	positive
PC 12:0_16:1	0.771429	0.102778	positive
PC 14:0_17:1	0.771429	0.102778	positive
PE 14:0_16:1	0.771429	0.102778	positive
PE 15:1_16:1	0.771429	0.102778	positive
PE 16:0_16:1	0.771429	0.102778	positive
Cer 17:1;2O/20:0	0.771429	0.102778	positive
PC 12:0_16:1	0.771429	0.102778	positive
MGDG 16:0_13:1	0.771429	0.102778	positive
DG 13:0_16:1	0.771429	0.102778	positive
TG 10:0_10:0_18:0	0.771429	0.102778	positive
TG 10:0_14:0_16:0	0.771429	0.102778	positive
TG 10:0_14:1_18:1	0.771429	0.102778	positive
PE 13:1_20:1	0.771429	0.102778	positive
Cer 18:1;2O/17:0	0.771429	0.102778	positive
PC 13:0_16:1	0.771429	0.102778	positive
PC 14:0_16:0	0.771429	0.102778	positive
PC 40:3	0.771429	0.102778	positive
PE 14:0_16:1	0.771429	0.102778	positive
PE 15:1_16:1	0.771429	0.102778	positive
PE 16:0_16:1	0.771429	0.102778	positive
Cer 17:1;2O/20:0	0.771429	0.102778	positive
PC 12:0_16:1	0.771429	0.102778	positive
TG 10:0_13:0_16:0	0.771429	0.102778	positive
PE 14:0_16:1	0.771429	0.102778	positive
PE 15:0_16:1	0.771429	0.102778	positive
PC 14:0_17:1	0.771429	0.102778	positive
TG 10:0_13:0_16:0	0.771429	0.102778	positive
PE 14:0_16:1	0.771429	0.102778	positive
PC 14:0_17:1	0.771429	0.102778	positive
PE 15:0_16:1	0.771429	0.102778	positive
PE 15:1_16:1	0.771429	0.102778	positive
PE 16:0_16:1	0.771429	0.102778	positive
Cer 17:1;2O/20:0	0.771429	0.102778	positive
PC 12:0_16:1	0.771429	0.102778	positive
PC 13:0_13:0	0.771429	0.102778	positive
TG 10:0_13:0_16:0	0.771429	0.102778	positive
PE 15:0_16:1	0.771429	0.102778	positive
PE 15:1_16:1	0.771429	0.102778	positive
PE 16:0_16:1	0.771429	0.102778	positive
Cer 17:1;2O/20:0	0.771429	0.102778	positive
PC 12:0_16:1	0.771429	0.102778	positive
PC 14:0_17:1	0.771429	0.102778	positive
PE 15:0_16:1	0.771429	0.102778	positive
PE 15:1_16:1	0.771429	0.102778	positive
PE 16:0_16:1	0.771429	0.102778	positive
Cer 17:1;2O/20:0	0.771429	0.102778	positive
PC 12:0_16:1	0.771429	0.102778	positive
PC 13:0_13:0	0.771429	0.102778	positive
MGDG 16:0_13:1	0.771429	0.102778	positive
DG 13:0_16:1	0.771429	0.102778	positive
TG 10:0_10:0_18:0	0.771429	0.102778	positive
TG 10:0_14:0_16:0	0.771429	0.102778	positive
TG 10:0_14:1_18:1	0.771429	0.102778	positive
PE 13:1_20:1	0.771429	0.102778	positive
Cer 18:1;2O/17:0	0.771429	0.102778	positive
PC 13:0_16:1	0.771429	0.102778	positive
PC 14:0_16:0	0.771429	0.102778	positive
PC 40:3	0.771429	0.102778	positive
Cer 18:1;2O/16:0	0.771429	0.102778	positive
TG 10:0_13:0_16:0	0.771429	0.102778	positive
PE 15:0_16:1	0.771429	0.102778	positive
PE 15:1_16:1	0.771429	0.102778	positive
PE 16:0_16:1	0.771429	0.102778	positive
Cer 17:1;2O/20:0	0.771429	0.102778	positive
PC 12:0_16:1	0.771429	0.102778	positive
PC 14:0_17:1	0.771429	0.102778	positive
TG 10:0_13:0_16:0	0.771429	0.102778	positive
PE 14:0_16:1	0.771429	0.102778	positive
PC 14:0_17:1	0.771429	0.102778	positive
Cer 18:1;2O/18:3	0.771429	0.102778	positive
PC 14:0_16:0	0.771429	0.102778	positive
Cer 18:1;2O/16:1	0.758971	0.0801412	positive
PC 14:0_16:0	0.758971	0.0801412	positive
PC 40:3	0.758971	0.0801412	positive
DG 13:0_16:1	0.714286	0.136111	positive
TG 10:0_10:0_18:0	0.714286	0.136111	positive
PE 15:0_16:1	0.714286	0.136111	positive
DG 10:0_16:1	0.714286	0.136111	positive
DG 12:0_16:1	0.714286	0.136111	positive
DG 14:0_14:0	0.714286	0.136111	positive
TG 10:0_14:1_18:1	0.714286	0.136111	positive
PE 15:0_16:1	0.714286	0.136111	positive
MGDG 16:0_13:1	0.714286	0.136111	positive
Cer 18:1;2O/17:0	0.714286	0.136111	positive
Cer 18:1;2O/20:0	0.714286	0.136111	positive
PC 14:0_16:1	0.714286	0.136111	positive
TG 10:0_13:0_16:0	0.714286	0.136111	positive
PE 15:0_16:1	0.714286	0.136111	positive
PC 13:0_13:0	0.714286	0.136111	positive
PC 14:0_17:1	0.714286	0.136111	positive
PC 14:0_16:0	0.714286	0.136111	positive
PC 14:0_16:0	0.714286	0.136111	positive
DG 13:0_16:1	0.714286	0.136111	positive
TG 10:0_10:0_18:0	0.714286	0.136111	positive
TG 10:0_14:1_18:1	0.714286	0.136111	positive
Cer 18:1;2O/16:0	0.714286	0.136111	positive
TG 10:0_11:0_16:0	0.714286	0.136111	positive
TG 10:0_11:0_18:1	0.714286	0.136111	positive
TG 10:0_14:0_16:0	0.714286	0.136111	positive
PE 13:1_20:1	0.714286	0.136111	positive
PE 16:0_18:1	0.714286	0.136111	positive
PC 13:0_16:1	0.714286	0.136111	positive
TG 10:0_13:0_16:0	0.714286	0.136111	positive
PE 15:0_16:1	0.714286	0.136111	positive
PC 14:0_17:1	0.714286	0.136111	positive
PE 14:0_16:1	0.714286	0.136111	positive
Cer 18:1;2O/16:0	0.714286	0.136111	positive
PE 14:0_16:1	0.714286	0.136111	positive
PC 14:0_16:0	0.714286	0.136111	positive
Cer 18:1;2O/16:1	0.714286	0.136111	positive
DG 13:0_16:1	0.714286	0.136111	positive
TG 10:0_10:0_18:0	0.714286	0.136111	positive
TG 10:0_14:1_18:1	0.714286	0.136111	positive
TG 10:0_11:0_16:0	0.714286	0.136111	positive
TG 10:0_11:0_18:1	0.714286	0.136111	positive
TG 10:0_14:0_16:0	0.714286	0.136111	positive
PE 13:1_20:1	0.714286	0.136111	positive
PE 16:0_18:1	0.714286	0.136111	positive
PC 13:0_16:1	0.714286	0.136111	positive
PE 16:0_16:1	0.714286	0.136111	positive
TG 10:0_11:0_16:0	0.714286	0.136111	positive
TG 10:0_11:0_18:1	0.714286	0.136111	positive
TG 10:0_14:0_16:0	0.714286	0.136111	positive
PE 13:1_20:1	0.714286	0.136111	positive
PE 16:0_18:1	0.714286	0.136111	positive
PC 13:0_16:1	0.714286	0.136111	positive
PE 16:0_18:1	0.714286	0.136111	positive
Cer 18:1;2O/20:0	0.714286	0.136111	positive
PC 14:0_16:1	0.714286	0.136111	positive
DG 10:0_16:1	0.714286	0.136111	positive
DG 12:0_16:1	0.714286	0.136111	positive
DG 14:0_14:0	0.714286	0.136111	positive
DG 13:0_16:1	0.714286	0.136111	positive
TG 10:0_10:0_18:0	0.714286	0.136111	positive
TG 10:0_14:1_18:1	0.714286	0.136111	positive
DG 13:0_16:1	0.714286	0.136111	positive
TG 10:0_10:0_18:0	0.714286	0.136111	positive
TG 10:0_14:1_18:1	0.714286	0.136111	positive
PE 16:0_16:1	0.714286	0.136111	positive
DG 10:0_16:1	0.714286	0.136111	positive
DG 12:0_16:1	0.714286	0.136111	positive
DG 14:0_14:0	0.714286	0.136111	positive
Cer 18:1;2O/16:0	0.714286	0.136111	positive
PE 16:0_18:1	0.657143	0.175	positive
TG 10:0_11:0_16:0	0.657143	0.175	positive
TG 10:0_11:0_18:1	0.657143	0.175	positive
TG 10:0_14:0_16:0	0.657143	0.175	positive
PE 13:1_20:1	0.657143	0.175	positive
Cer 18:1;2O/20:0	0.657143	0.175	positive
PC 13:0_16:1	0.657143	0.175	positive
PC 14:0_16:1	0.657143	0.175	positive
PE 14:0_16:1	0.657143	0.175	positive
PE 16:0_16:1	0.657143	0.175	positive
MGDG 16:0_13:1	0.657143	0.175	positive
TG 10:0_11:0_16:0	0.657143	0.175	positive
TG 10:0_11:0_18:1	0.657143	0.175	positive
Cer 18:1;2O/17:0	0.657143	0.175	positive
PE 14:0_16:1	0.657143	0.175	positive
PE 16:0_16:1	0.657143	0.175	positive
DG 13:0_16:1	0.657143	0.175	positive
TG 10:0_10:0_18:0	0.657143	0.175	positive
PE 14:0_16:1	0.657143	0.175	positive
PE 16:0_16:1	0.657143	0.175	positive
Cer 18:1;2O/18:3	0.657143	0.175	positive
Cer 18:1;2O/18:3	0.657143	0.175	positive
Cer 18:1;2O/16:1	0.657143	0.175	positive
TG 10:0_11:0_16:0	0.657143	0.175	positive
TG 10:0_11:0_18:1	0.657143	0.175	positive
Cer 18:1;2O/20:0	0.657143	0.175	positive
PC 14:0_16:1	0.657143	0.175	positive
Cer 18:1;2O/16:1	0.657143	0.175	positive
PC 14:0_16:0	0.657143	0.175	positive
PC 40:3	0.657143	0.175	positive
DG 10:0_16:1	0.657143	0.175	positive
DG 12:0_16:1	0.657143	0.175	positive
DG 14:0_14:0	0.657143	0.175	positive
TG 10:0_13:0_16:0	0.657143	0.175	positive
PE 15:0_16:1	0.657143	0.175	positive
PE 15:1_16:1	0.657143	0.175	positive
Cer 17:1;2O/20:0	0.657143	0.175	positive
PC 12:0_16:1	0.657143	0.175	positive
PC 14:0_17:1	0.657143	0.175	positive
Cer 18:1;2O/16:1	0.657143	0.175	positive
PC 13:0_13:0	0.657143	0.175	positive
Cer 18:1;2O/18:3	0.657143	0.175	positive
Cer 18:1;2O/16:0	0.657143	0.175	positive
TG 10:0_11:0_16:0	0.657143	0.175	positive
TG 10:0_11:0_18:1	0.657143	0.175	positive
Cer 18:1;2O/20:0	0.657143	0.175	positive
PC 14:0_16:1	0.657143	0.175	positive
TG 10:0_11:0_16:0	0.657143	0.175	positive
TG 10:0_11:0_18:1	0.657143	0.175	positive
TG 10:0_14:0_16:0	0.657143	0.175	positive
PE 13:1_20:1	0.657143	0.175	positive
Cer 18:1;2O/20:0	0.657143	0.175	positive
PC 13:0_16:1	0.657143	0.175	positive
PC 14:0_16:1	0.657143	0.175	positive
DG 10:0_16:1	0.657143	0.175	positive
DG 12:0_16:1	0.657143	0.175	positive
DG 14:0_14:0	0.657143	0.175	positive
TG 10:0_13:0_16:0	0.657143	0.175	positive
PC 14:0_17:1	0.657143	0.175	positive
DG 10:0_16:1	0.657143	0.175	positive
DG 12:0_16:1	0.657143	0.175	positive
DG 14:0_14:0	0.657143	0.175	positive
TG 10:0_14:0_16:0	0.657143	0.175	positive
PE 13:1_20:1	0.657143	0.175	positive
PC 13:0_16:1	0.657143	0.175	positive
TG 10:0_11:0_16:0	0.657143	0.175	positive
TG 10:0_11:0_18:1	0.657143	0.175	positive
Cer 18:1;2O/20:0	0.657143	0.175	positive
PC 14:0_16:1	0.657143	0.175	positive
TG 10:0_11:0_16:0	0.657143	0.175	positive
TG 10:0_11:0_18:1	0.657143	0.175	positive
TG 10:0_14:0_16:0	0.657143	0.175	positive
PE 13:1_20:1	0.657143	0.175	positive
Cer 18:1;2O/20:0	0.657143	0.175	positive
PC 13:0_16:1	0.657143	0.175	positive
PC 14:0_16:1	0.657143	0.175	positive
TG 10:0_11:0_16:0	0.657143	0.175	positive
TG 10:0_11:0_18:1	0.657143	0.175	positive
Cer 18:1;2O/20:0	0.657143	0.175	positive
PC 14:0_16:1	0.657143	0.175	positive
TG 10:0_13:0_16:0	0.657143	0.175	positive
PC 14:0_17:1	0.657143	0.175	positive
TG 10:0_11:0_16:0	0.657143	0.175	positive
TG 10:0_11:0_18:1	0.657143	0.175	positive
TG 10:0_14:0_16:0	0.657143	0.175	positive
PE 13:1_20:1	0.657143	0.175	positive
Cer 18:1;2O/20:0	0.657143	0.175	positive
PC 13:0_16:1	0.657143	0.175	positive
PC 14:0_16:1	0.657143	0.175	positive
TG 10:0_14:0_16:0	0.657143	0.175	positive
PE 13:1_20:1	0.657143	0.175	positive
PC 13:0_16:1	0.657143	0.175	positive
Cer 18:1;2O/16:1	0.657143	0.175	positive
PE 15:0_16:1	0.6	0.241667	positive
PE 14:0_16:1	0.6	0.241667	positive
TG 10:0_11:0_16:0	0.6	0.241667	positive
TG 10:0_11:0_18:1	0.6	0.241667	positive
PE 16:0_16:1	0.6	0.241667	positive
PC 13:0_13:0	0.6	0.241667	positive
TG 10:0_11:0_16:0	0.6	0.241667	positive
TG 10:0_11:0_18:1	0.6	0.241667	positive
PE 14:0_16:1	0.6	0.241667	positive
PE 16:0_16:1	0.6	0.241667	positive
DG 13:0_16:1	0.6	0.241667	positive
TG 10:0_10:0_18:0	0.6	0.241667	positive
TG 10:0_11:0_16:0	0.6	0.241667	positive
TG 10:0_11:0_18:1	0.6	0.241667	positive
Cer 18:1;2O/16:0	0.6	0.241667	positive
Cer 18:1;2O/16:0	0.6	0.241667	positive
TG 10:0_13:0_16:0	0.6	0.241667	positive
PE 14:0_16:1	0.6	0.241667	positive
PC 14:0_17:1	0.6	0.241667	positive
PC 14:0_16:0	0.6	0.241667	positive
Cer 18:1;2O/16:1	0.6	0.241667	positive
PE 15:0_16:1	0.6	0.241667	positive
TG 10:0_14:0_16:0	0.6	0.241667	positive
PE 13:1_20:1	0.6	0.241667	positive
PC 13:0_16:1	0.6	0.241667	positive
Cer 18:1;2O/16:1	0.6	0.241667	positive
MGDG 16:0_13:1	0.6	0.241667	positive
DG 13:0_16:1	0.6	0.241667	positive
TG 10:0_10:0_18:0	0.6	0.241667	positive
TG 10:0_11:0_16:0	0.6	0.241667	positive
TG 10:0_11:0_18:1	0.6	0.241667	positive
Cer 18:1;2O/17:0	0.6	0.241667	positive
Cer 18:1;2O/16:1	0.6	0.241667	positive
Cer 18:1;2O/16:0	0.6	0.241667	positive
TG 10:0_13:0_16:0	0.6	0.241667	positive
PE 14:0_16:1	0.6	0.241667	positive
PC 14:0_17:1	0.6	0.241667	positive
PE 14:0_16:1	0.6	0.241667	positive
PE 15:0_16:1	0.6	0.241667	positive
TG 10:0_11:0_16:0	0.6	0.241667	positive
TG 10:0_11:0_18:1	0.6	0.241667	positive
Cer 18:1;2O/20:0	0.6	0.241667	positive
PC 14:0_16:1	0.6	0.241667	positive
PE 15:0_16:1	0.6	0.241667	positive
PE 15:1_16:1	0.6	0.241667	positive
Cer 17:1;2O/20:0	0.6	0.241667	positive
PC 12:0_16:1	0.6	0.241667	positive
PE 15:0_16:1	0.6	0.241667	positive
PE 15:1_16:1	0.6	0.241667	positive
Cer 17:1;2O/20:0	0.6	0.241667	positive
PC 12:0_16:1	0.6	0.241667	positive
TG 10:0_13:0_16:0	0.6	0.241667	positive
PE 14:0_16:1	0.6	0.241667	positive
PC 14:0_17:1	0.6	0.241667	positive
PE 14:0_16:1	0.6	0.241667	positive
TG 10:0_13:0_16:0	0.6	0.241667	positive
PE 14:0_16:1	0.6	0.241667	positive
PC 14:0_17:1	0.6	0.241667	positive
TG 10:0_11:0_16:0	0.6	0.241667	positive
TG 10:0_11:0_18:1	0.6	0.241667	positive
Cer 18:1;2O/20:0	0.6	0.241667	positive
PC 14:0_16:1	0.6	0.241667	positive
Cer 18:1;2O/16:1	0.6	0.241667	positive
PE 14:0_16:1	0.6	0.241667	positive
PE 15:0_16:1	0.6	0.241667	positive
PE 15:1_16:1	0.6	0.241667	positive
Cer 17:1;2O/20:0	0.6	0.241667	positive
PC 12:0_16:1	0.6	0.241667	positive
DG 10:0_16:1	0.542857	0.297222	positive
DG 12:0_16:1	0.542857	0.297222	positive
DG 14:0_14:0	0.542857	0.297222	positive
DG 13:0_16:1	0.542857	0.297222	positive
TG 10:0_10:0_18:0	0.542857	0.297222	positive
TG 10:0_11:0_16:0	0.542857	0.297222	positive
TG 10:0_11:0_18:1	0.542857	0.297222	positive
PE 15:1_16:1	0.542857	0.297222	positive
Cer 17:1;2O/20:0	0.542857	0.297222	positive
PC 12:0_16:1	0.542857	0.297222	positive
PE 16:0_16:1	0.542857	0.297222	positive
PE 14:0_16:1	0.542857	0.297222	positive
Cer 18:1;2O/16:1	0.542857	0.297222	positive
TG 10:0_14:0_16:0	0.542857	0.297222	positive
PE 13:1_20:1	0.542857	0.297222	positive
PC 13:0_16:1	0.542857	0.297222	positive
PE 14:0_16:1	0.542857	0.297222	positive
Cer 18:1;2O/16:1	0.542857	0.297222	positive
PC 40:3	-0.542857	0.297222	negtive
PC 14:0_16:0	-0.542857	0.297222	negtive
PC 14:0_16:0	-0.542857	0.297222	negtive
Cer 18:1;2O/16:0	-0.542857	0.297222	negtive
PE 15:0_16:1	-0.542857	0.297222	negtive
PC 14:0_16:0	-0.542857	0.297222	negtive
PC 14:0_16:0	-0.542857	0.297222	negtive
Cer 18:1;2O/16:0	-0.542857	0.297222	negtive
PE 15:0_16:1	-0.542857	0.297222	negtive
Cer 18:1;2O/16:1	-0.6	0.241667	negtive
Cer 18:1;2O/16:0	-0.6	0.241667	negtive
Cer 18:1;2O/16:0	-0.6	0.241667	negtive
PC 14:0_16:0	-0.6	0.241667	negtive
PC 40:3	-0.6	0.241667	negtive
PE 14:0_16:1	-0.6	0.241667	negtive
PE 14:0_16:1	-0.6	0.241667	negtive
DG 10:0_16:1	-0.6	0.241667	negtive
DG 12:0_16:1	-0.6	0.241667	negtive
DG 14:0_14:0	-0.6	0.241667	negtive
PE 16:0_18:1	-0.6	0.241667	negtive
Cer 18:1;2O/16:0	-0.6	0.241667	negtive
PE 15:0_16:1	-0.6	0.241667	negtive
Cer 18:1;2O/16:1	-0.6	0.241667	negtive
PC 14:0_16:0	-0.6	0.241667	negtive
PE 15:0_16:1	-0.6	0.241667	negtive
TG 10:0_14:0_16:0	-0.6	0.241667	negtive
PE 13:1_20:1	-0.6	0.241667	negtive
PC 13:0_16:1	-0.6	0.241667	negtive
PC 40:3	-0.6	0.241667	negtive
PE 15:0_16:1	-0.6	0.241667	negtive
PE 14:0_16:1	-0.6	0.241667	negtive
TG 10:0_11:0_16:0	-0.6	0.241667	negtive
TG 10:0_11:0_18:1	-0.6	0.241667	negtive
Cer 18:1;2O/16:0	-0.6	0.241667	negtive
Cer 18:1;2O/16:0	-0.6	0.241667	negtive
Cer 18:1;2O/16:1	-0.6	0.241667	negtive
Cer 18:1;2O/18:3	-0.6	0.241667	negtive
PC 14:0_16:0	-0.6	0.241667	negtive
DG 10:0_16:1	-0.6	0.241667	negtive
DG 12:0_16:1	-0.6	0.241667	negtive
DG 14:0_14:0	-0.6	0.241667	negtive
Cer 18:1;2O/16:1	-0.6	0.241667	negtive
Cer 18:1;2O/16:1	-0.6	0.241667	negtive
Cer 18:1;2O/16:0	-0.6	0.241667	negtive
Cer 18:1;2O/16:0	-0.6	0.241667	negtive
Cer 18:1;2O/16:0	-0.6	0.241667	negtive
Cer 18:1;2O/18:3	-0.6	0.241667	negtive
PC 14:0_16:0	-0.6	0.241667	negtive
DG 10:0_16:1	-0.6	0.241667	negtive
DG 12:0_16:1	-0.6	0.241667	negtive
DG 14:0_14:0	-0.6	0.241667	negtive
PE 15:0_16:1	-0.6	0.241667	negtive
Cer 18:1;2O/16:0	-0.6	0.241667	negtive
Cer 18:1;2O/16:1	-0.6	0.241667	negtive
TG 10:0_14:0_16:0	-0.6	0.241667	negtive
PE 13:1_20:1	-0.6	0.241667	negtive
PC 13:0_16:1	-0.6	0.241667	negtive
Cer 18:1;2O/18:3	-0.657143	0.175	negtive
Cer 18:1;2O/16:0	-0.657143	0.175	negtive
Cer 18:1;2O/16:0	-0.657143	0.175	negtive
PC 14:0_16:0	-0.657143	0.175	negtive
PC 40:3	-0.657143	0.175	negtive
Cer 18:1;2O/16:0	-0.657143	0.175	negtive
TG 10:0_11:0_16:0	-0.657143	0.175	negtive
TG 10:0_11:0_18:1	-0.657143	0.175	negtive
TG 10:0_14:0_16:0	-0.657143	0.175	negtive
PE 13:1_20:1	-0.657143	0.175	negtive
Cer 18:1;2O/20:0	-0.657143	0.175	negtive
PC 13:0_16:1	-0.657143	0.175	negtive
PC 14:0_16:1	-0.657143	0.175	negtive
TG 10:0_11:0_16:0	-0.657143	0.175	negtive
TG 10:0_11:0_18:1	-0.657143	0.175	negtive
TG 10:0_14:0_16:0	-0.657143	0.175	negtive
PE 13:1_20:1	-0.657143	0.175	negtive
Cer 18:1;2O/20:0	-0.657143	0.175	negtive
PC 13:0_16:1	-0.657143	0.175	negtive
PC 14:0_16:1	-0.657143	0.175	negtive
PE 15:0_16:1	-0.657143	0.175	negtive
Cer 18:1;2O/18:3	-0.657143	0.175	negtive
TG 10:0_13:0_16:0	-0.657143	0.175	negtive
PE 15:0_16:1	-0.657143	0.175	negtive
PE 15:1_16:1	-0.657143	0.175	negtive
Cer 17:1;2O/20:0	-0.657143	0.175	negtive
PC 12:0_16:1	-0.657143	0.175	negtive
PC 14:0_17:1	-0.657143	0.175	negtive
DG 10:0_16:1	-0.657143	0.175	negtive
DG 12:0_16:1	-0.657143	0.175	negtive
DG 13:0_16:1	-0.657143	0.175	negtive
DG 14:0_14:0	-0.657143	0.175	negtive
TG 10:0_10:0_18:0	-0.657143	0.175	negtive
Cer 18:1;2O/16:1	-0.657143	0.175	negtive
DG 10:0_16:1	-0.657143	0.175	negtive
DG 12:0_16:1	-0.657143	0.175	negtive
DG 14:0_14:0	-0.657143	0.175	negtive
PE 15:0_16:1	-0.657143	0.175	negtive
PE 15:1_16:1	-0.657143	0.175	negtive
Cer 17:1;2O/20:0	-0.657143	0.175	negtive
PC 12:0_16:1	-0.657143	0.175	negtive
DG 10:0_16:1	-0.657143	0.175	negtive
DG 12:0_16:1	-0.657143	0.175	negtive
DG 14:0_14:0	-0.657143	0.175	negtive
TG 10:0_11:0_16:0	-0.657143	0.175	negtive
TG 10:0_11:0_18:1	-0.657143	0.175	negtive
TG 10:0_14:0_16:0	-0.657143	0.175	negtive
PE 13:1_20:1	-0.657143	0.175	negtive
Cer 18:1;2O/20:0	-0.657143	0.175	negtive
PC 13:0_16:1	-0.657143	0.175	negtive
PC 14:0_16:1	-0.657143	0.175	negtive
PE 14:0_16:1	-0.657143	0.175	negtive
PE 16:0_16:1	-0.657143	0.175	negtive
Cer 18:1;2O/18:3	-0.657143	0.175	negtive
Cer 18:1;2O/18:3	-0.657143	0.175	negtive
Cer 18:1;2O/18:3	-0.657143	0.175	negtive
Cer 18:1;2O/18:3	-0.657143	0.175	negtive
Cer 18:1;2O/18:3	-0.657143	0.175	negtive
DG 10:0_16:1	-0.657143	0.175	negtive
DG 12:0_16:1	-0.657143	0.175	negtive
DG 14:0_14:0	-0.657143	0.175	negtive
Cer 18:1;2O/18:3	-0.657143	0.175	negtive
PE 15:0_16:1	-0.657143	0.175	negtive
PE 15:1_16:1	-0.657143	0.175	negtive
Cer 17:1;2O/20:0	-0.657143	0.175	negtive
PC 12:0_16:1	-0.657143	0.175	negtive
PC 40:3	-0.714286	0.136111	negtive
PC 14:0_16:0	-0.714286	0.136111	negtive
Cer 18:1;2O/16:1	-0.714286	0.136111	negtive
PC 14:0_16:0	-0.714286	0.136111	negtive
Cer 18:1;2O/16:1	-0.714286	0.136111	negtive
Cer 18:1;2O/18:3	-0.714286	0.136111	negtive
Cer 18:1;2O/16:1	-0.714286	0.136111	negtive
PE 16:0_16:1	-0.714286	0.136111	negtive
PC 40:3	-0.714286	0.136111	negtive
PE 14:0_16:1	-0.714286	0.136111	negtive
TG 10:0_11:0_16:0	-0.714286	0.136111	negtive
TG 10:0_11:0_18:1	-0.714286	0.136111	negtive
Cer 18:1;2O/16:1	-0.714286	0.136111	negtive
Cer 18:1;2O/16:0	-0.714286	0.136111	negtive
TG 10:0_11:0_16:0	-0.714286	0.136111	negtive
TG 10:0_11:0_18:1	-0.714286	0.136111	negtive
TG 10:0_14:0_16:0	-0.714286	0.136111	negtive
PE 13:1_20:1	-0.714286	0.136111	negtive
PE 16:0_18:1	-0.714286	0.136111	negtive
PC 13:0_16:1	-0.714286	0.136111	negtive
PE 14:0_16:1	-0.714286	0.136111	negtive
Cer 18:1;2O/16:0	-0.714286	0.136111	negtive
TG 10:0_11:0_16:0	-0.714286	0.136111	negtive
TG 10:0_11:0_18:1	-0.714286	0.136111	negtive
TG 10:0_14:0_16:0	-0.714286	0.136111	negtive
PE 13:1_20:1	-0.714286	0.136111	negtive
PE 16:0_18:1	-0.714286	0.136111	negtive
PC 13:0_16:1	-0.714286	0.136111	negtive
PE 15:0_16:1	-0.714286	0.136111	negtive
PC 40:3	-0.714286	0.136111	negtive
PC 14:0_16:0	-0.714286	0.136111	negtive
PE 15:1_16:1	-0.714286	0.136111	negtive
Cer 17:1;2O/20:0	-0.714286	0.136111	negtive
PC 12:0_16:1	-0.714286	0.136111	negtive
Cer 18:1;2O/18:3	-0.714286	0.136111	negtive
PC 14:0_16:0	-0.714286	0.136111	negtive
PC 40:3	-0.714286	0.136111	negtive
PC 14:0_16:0	-0.714286	0.136111	negtive
PC 40:3	-0.714286	0.136111	negtive
PE 15:1_16:1	-0.714286	0.136111	negtive
Cer 17:1;2O/20:0	-0.714286	0.136111	negtive
PC 12:0_16:1	-0.714286	0.136111	negtive
TG 10:0_11:0_16:0	-0.714286	0.136111	negtive
TG 10:0_11:0_18:1	-0.714286	0.136111	negtive
TG 10:0_14:0_16:0	-0.714286	0.136111	negtive
PE 13:1_20:1	-0.714286	0.136111	negtive
PE 16:0_18:1	-0.714286	0.136111	negtive
PC 13:0_16:1	-0.714286	0.136111	negtive
PC 14:0_16:0	-0.714286	0.136111	negtive
PC 14:0_16:0	-0.714286	0.136111	negtive
PE 14:0_16:1	-0.714286	0.136111	negtive
DG 10:0_16:1	-0.758971	0.0801412	negtive
DG 12:0_16:1	-0.758971	0.0801412	negtive
DG 13:0_16:1	-0.758971	0.0801412	negtive
DG 14:0_14:0	-0.758971	0.0801412	negtive
TG 10:0_10:0_18:0	-0.758971	0.0801412	negtive
TG 10:0_13:0_16:0	-0.758971	0.0801412	negtive
TG 10:0_14:1_18:1	-0.758971	0.0801412	negtive
PE 15:0_16:1	-0.758971	0.0801412	negtive
PE 15:1_16:1	-0.758971	0.0801412	negtive
Cer 17:1;2O/20:0	-0.758971	0.0801412	negtive
PC 12:0_16:1	-0.758971	0.0801412	negtive
PC 13:0_13:0	-0.758971	0.0801412	negtive
PC 14:0_17:1	-0.758971	0.0801412	negtive
Cer 18:1;2O/16:1	-0.771429	0.102778	negtive
Cer 18:1;2O/18:3	-0.771429	0.102778	negtive
PC 14:0_16:0	-0.771429	0.102778	negtive
PC 40:3	-0.771429	0.102778	negtive
Cer 18:1;2O/16:0	-0.771429	0.102778	negtive
Cer 18:1;2O/16:1	-0.771429	0.102778	negtive
Cer 18:1;2O/18:3	-0.771429	0.102778	negtive
PC 14:0_16:0	-0.771429	0.102778	negtive
PC 40:3	-0.771429	0.102778	negtive
Cer 18:1;2O/16:1	-0.771429	0.102778	negtive
Cer 18:1;2O/18:3	-0.771429	0.102778	negtive
TG 10:0_13:0_16:0	-0.771429	0.102778	negtive
PE 15:0_16:1	-0.771429	0.102778	negtive
PE 15:1_16:1	-0.771429	0.102778	negtive
PE 16:0_16:1	-0.771429	0.102778	negtive
Cer 17:1;2O/20:0	-0.771429	0.102778	negtive
PC 12:0_16:1	-0.771429	0.102778	negtive
PC 14:0_17:1	-0.771429	0.102778	negtive
TG 10:0_13:0_16:0	-0.771429	0.102778	negtive
PE 15:0_16:1	-0.771429	0.102778	negtive
PE 15:1_16:1	-0.771429	0.102778	negtive
PE 16:0_16:1	-0.771429	0.102778	negtive
Cer 17:1;2O/20:0	-0.771429	0.102778	negtive
PC 12:0_16:1	-0.771429	0.102778	negtive
PC 14:0_17:1	-0.771429	0.102778	negtive
MGDG 16:0_13:1	-0.771429	0.102778	negtive
DG 13:0_16:1	-0.771429	0.102778	negtive
TG 10:0_10:0_18:0	-0.771429	0.102778	negtive
TG 10:0_11:0_16:0	-0.771429	0.102778	negtive
TG 10:0_11:0_18:1	-0.771429	0.102778	negtive
TG 10:0_14:0_16:0	-0.771429	0.102778	negtive
PE 13:1_20:1	-0.771429	0.102778	negtive
Cer 18:1;2O/17:0	-0.771429	0.102778	negtive
PC 13:0_16:1	-0.771429	0.102778	negtive
Cer 18:1;2O/16:1	-0.771429	0.102778	negtive
DG 10:0_16:1	-0.771429	0.102778	negtive
DG 12:0_16:1	-0.771429	0.102778	negtive
DG 13:0_16:1	-0.771429	0.102778	negtive
DG 14:0_14:0	-0.771429	0.102778	negtive
TG 10:0_10:0_18:0	-0.771429	0.102778	negtive
TG 10:0_11:0_16:0	-0.771429	0.102778	negtive
TG 10:0_11:0_18:1	-0.771429	0.102778	negtive
TG 10:0_14:0_16:0	-0.771429	0.102778	negtive
TG 10:0_14:1_18:1	-0.771429	0.102778	negtive
PE 13:1_20:1	-0.771429	0.102778	negtive
Cer 18:1;2O/20:0	-0.771429	0.102778	negtive
PC 13:0_16:1	-0.771429	0.102778	negtive
PC 14:0_16:1	-0.771429	0.102778	negtive
TG 10:0_13:0_16:0	-0.771429	0.102778	negtive
PE 14:0_16:1	-0.771429	0.102778	negtive
PE 15:1_16:1	-0.771429	0.102778	negtive
PE 16:0_16:1	-0.771429	0.102778	negtive
Cer 17:1;2O/20:0	-0.771429	0.102778	negtive
PC 12:0_16:1	-0.771429	0.102778	negtive
PC 13:0_13:0	-0.771429	0.102778	negtive
PC 14:0_17:1	-0.771429	0.102778	negtive
Cer 18:1;2O/16:0	-0.771429	0.102778	negtive
Cer 18:1;2O/18:3	-0.771429	0.102778	negtive
PC 14:0_16:0	-0.771429	0.102778	negtive
Cer 18:1;2O/18:3	-0.771429	0.102778	negtive
PC 40:3	-0.771429	0.102778	negtive
PE 14:0_16:1	-0.771429	0.102778	negtive
PE 15:1_16:1	-0.771429	0.102778	negtive
PE 16:0_16:1	-0.771429	0.102778	negtive
Cer 17:1;2O/20:0	-0.771429	0.102778	negtive
PC 12:0_16:1	-0.771429	0.102778	negtive
DG 10:0_16:1	-0.771429	0.102778	negtive
DG 12:0_16:1	-0.771429	0.102778	negtive
DG 14:0_14:0	-0.771429	0.102778	negtive
TG 10:0_11:0_16:0	-0.771429	0.102778	negtive
TG 10:0_11:0_18:1	-0.771429	0.102778	negtive
PE 16:0_18:1	-0.771429	0.102778	negtive
Cer 18:1;2O/20:0	-0.771429	0.102778	negtive
PC 14:0_16:1	-0.771429	0.102778	negtive
Cer 18:1;2O/18:3	-0.771429	0.102778	negtive
PC 14:0_16:0	-0.771429	0.102778	negtive
PE 14:0_16:1	-0.771429	0.102778	negtive
PE 15:1_16:1	-0.771429	0.102778	negtive
PE 16:0_16:1	-0.771429	0.102778	negtive
Cer 17:1;2O/20:0	-0.771429	0.102778	negtive
PC 12:0_16:1	-0.771429	0.102778	negtive
TG 10:0_13:0_16:0	-0.771429	0.102778	negtive
PE 15:0_16:1	-0.771429	0.102778	negtive
PE 15:1_16:1	-0.771429	0.102778	negtive
PE 16:0_16:1	-0.771429	0.102778	negtive
Cer 17:1;2O/20:0	-0.771429	0.102778	negtive
PC 12:0_16:1	-0.771429	0.102778	negtive
PC 14:0_17:1	-0.771429	0.102778	negtive
MGDG 16:0_13:1	-0.771429	0.102778	negtive
DG 10:0_16:1	-0.771429	0.102778	negtive
DG 12:0_16:1	-0.771429	0.102778	negtive
DG 13:0_16:1	-0.771429	0.102778	negtive
DG 14:0_14:0	-0.771429	0.102778	negtive
TG 10:0_10:0_18:0	-0.771429	0.102778	negtive
TG 10:0_14:0_16:0	-0.771429	0.102778	negtive
PE 13:1_20:1	-0.771429	0.102778	negtive
PE 16:0_18:1	-0.771429	0.102778	negtive
Cer 18:1;2O/17:0	-0.771429	0.102778	negtive
Cer 18:1;2O/20:0	-0.771429	0.102778	negtive
PC 13:0_16:1	-0.771429	0.102778	negtive
PC 14:0_16:1	-0.771429	0.102778	negtive
Cer 18:1;2O/16:1	-0.771429	0.102778	negtive
Cer 18:1;2O/16:1	-0.771429	0.102778	negtive
Cer 18:1;2O/16:0	-0.771429	0.102778	negtive
PC 40:3	-0.771429	0.102778	negtive
DG 13:0_16:1	-0.771429	0.102778	negtive
TG 10:0_10:0_18:0	-0.771429	0.102778	negtive
TG 10:0_11:0_16:0	-0.771429	0.102778	negtive
TG 10:0_11:0_18:1	-0.771429	0.102778	negtive
TG 10:0_14:0_16:0	-0.771429	0.102778	negtive
PE 13:1_20:1	-0.771429	0.102778	negtive
PE 16:0_18:1	-0.771429	0.102778	negtive
PC 13:0_16:1	-0.771429	0.102778	negtive
Cer 18:1;2O/16:0	-0.771429	0.102778	negtive
Cer 18:1;2O/16:0	-0.771429	0.102778	negtive
Cer 18:1;2O/16:1	-0.771429	0.102778	negtive
Cer 18:1;2O/16:0	-0.771429	0.102778	negtive
Cer 18:1;2O/16:1	-0.771429	0.102778	negtive
Cer 18:1;2O/16:1	-0.771429	0.102778	negtive
Cer 18:1;2O/16:1	-0.771429	0.102778	negtive
PC 40:3	-0.771429	0.102778	negtive
DG 13:0_16:1	-0.771429	0.102778	negtive
TG 10:0_10:0_18:0	-0.771429	0.102778	negtive
TG 10:0_11:0_16:0	-0.771429	0.102778	negtive
TG 10:0_11:0_18:1	-0.771429	0.102778	negtive
TG 10:0_14:0_16:0	-0.771429	0.102778	negtive
PE 13:1_20:1	-0.771429	0.102778	negtive
PE 16:0_18:1	-0.771429	0.102778	negtive
PC 13:0_16:1	-0.771429	0.102778	negtive
PE 14:0_16:1	-0.771429	0.102778	negtive
PE 15:1_16:1	-0.771429	0.102778	negtive
PE 16:0_16:1	-0.771429	0.102778	negtive
Cer 17:1;2O/20:0	-0.771429	0.102778	negtive
PC 12:0_16:1	-0.771429	0.102778	negtive
Cer 18:1;2O/16:1	-0.771429	0.102778	negtive
Cer 18:1;2O/16:0	-0.771429	0.102778	negtive
DG 10:0_16:1	-0.771429	0.102778	negtive
DG 12:0_16:1	-0.771429	0.102778	negtive
DG 14:0_14:0	-0.771429	0.102778	negtive
TG 10:0_11:0_16:0	-0.771429	0.102778	negtive
TG 10:0_11:0_18:1	-0.771429	0.102778	negtive
PE 16:0_18:1	-0.771429	0.102778	negtive
Cer 18:1;2O/20:0	-0.771429	0.102778	negtive
PC 14:0_16:1	-0.771429	0.102778	negtive
Cer 18:1;2O/18:3	-0.828571	0.0583333	negtive
MGDG 16:0_13:1	-0.828571	0.0583333	negtive
PE 16:0_18:1	-0.828571	0.0583333	negtive
Cer 18:1;2O/17:0	-0.828571	0.0583333	negtive
MGDG 16:0_13:1	-0.828571	0.0583333	negtive
PE 16:0_18:1	-0.828571	0.0583333	negtive
Cer 18:1;2O/17:0	-0.828571	0.0583333	negtive
PE 15:1_16:1	-0.828571	0.0583333	negtive
Cer 17:1;2O/20:0	-0.828571	0.0583333	negtive
PC 12:0_16:1	-0.828571	0.0583333	negtive
PC 13:0_13:0	-0.828571	0.0583333	negtive
PC 13:0_13:0	-0.828571	0.0583333	negtive
TG 10:0_14:1_18:1	-0.828571	0.0583333	negtive
PC 14:0_16:0	-0.828571	0.0583333	negtive
PC 40:3	-0.828571	0.0583333	negtive
Cer 18:1;2O/16:0	-0.828571	0.0583333	negtive
DG 13:0_16:1	-0.828571	0.0583333	negtive
TG 10:0_10:0_18:0	-0.828571	0.0583333	negtive
TG 10:0_13:0_16:0	-0.828571	0.0583333	negtive
PC 14:0_17:1	-0.828571	0.0583333	negtive
Cer 18:1;2O/16:1	-0.828571	0.0583333	negtive
DG 13:0_16:1	-0.828571	0.0583333	negtive
TG 10:0_10:0_18:0	-0.828571	0.0583333	negtive
MGDG 16:0_13:1	-0.828571	0.0583333	negtive
PE 16:0_18:1	-0.828571	0.0583333	negtive
Cer 18:1;2O/17:0	-0.828571	0.0583333	negtive
PC 14:0_16:0	-0.828571	0.0583333	negtive
PC 40:3	-0.828571	0.0583333	negtive
Cer 18:1;2O/16:1	-0.828571	0.0583333	negtive
PE 14:0_16:1	-0.828571	0.0583333	negtive
PE 16:0_16:1	-0.828571	0.0583333	negtive
PC 14:0_16:0	-0.828571	0.0583333	negtive
PC 40:3	-0.828571	0.0583333	negtive
PC 14:0_16:0	-0.828571	0.0583333	negtive
Cer 18:1;2O/18:3	-0.828571	0.0583333	negtive
Cer 18:1;2O/16:1	-0.828571	0.0583333	negtive
PE 14:0_16:1	-0.828571	0.0583333	negtive
PE 16:0_16:1	-0.828571	0.0583333	negtive
DG 13:0_16:1	-0.828571	0.0583333	negtive
TG 10:0_10:0_18:0	-0.828571	0.0583333	negtive
Cer 18:1;2O/18:3	-0.828571	0.0583333	negtive
TG 10:0_13:0_16:0	-0.828571	0.0583333	negtive
PC 14:0_17:1	-0.828571	0.0583333	negtive
MGDG 16:0_13:1	-0.880406	0.0205987	negtive
TG 10:0_11:0_16:0	-0.880406	0.0205987	negtive
TG 10:0_11:0_18:1	-0.880406	0.0205987	negtive
TG 10:0_14:0_16:0	-0.880406	0.0205987	negtive
PE 13:1_20:1	-0.880406	0.0205987	negtive
PE 14:0_16:1	-0.880406	0.0205987	negtive
PE 16:0_16:1	-0.880406	0.0205987	negtive
PE 16:0_18:1	-0.880406	0.0205987	negtive
Cer 18:1;2O/17:0	-0.880406	0.0205987	negtive
Cer 18:1;2O/20:0	-0.880406	0.0205987	negtive
PC 13:0_16:1	-0.880406	0.0205987	negtive
PC 14:0_16:1	-0.880406	0.0205987	negtive
PC 14:0_16:0	-0.885714	0.0333333	negtive
PC 40:3	-0.885714	0.0333333	negtive
DG 10:0_16:1	-0.885714	0.0333333	negtive
DG 12:0_16:1	-0.885714	0.0333333	negtive
DG 13:0_16:1	-0.885714	0.0333333	negtive
DG 14:0_14:0	-0.885714	0.0333333	negtive
TG 10:0_10:0_18:0	-0.885714	0.0333333	negtive
TG 10:0_14:1_18:1	-0.885714	0.0333333	negtive
DG 10:0_16:1	-0.885714	0.0333333	negtive
DG 12:0_16:1	-0.885714	0.0333333	negtive
DG 13:0_16:1	-0.885714	0.0333333	negtive
DG 14:0_14:0	-0.885714	0.0333333	negtive
TG 10:0_10:0_18:0	-0.885714	0.0333333	negtive
TG 10:0_14:1_18:1	-0.885714	0.0333333	negtive
PE 14:0_16:1	-0.885714	0.0333333	negtive
PE 16:0_16:1	-0.885714	0.0333333	negtive
MGDG 16:0_13:1	-0.885714	0.0333333	negtive
TG 10:0_14:0_16:0	-0.885714	0.0333333	negtive
PE 13:1_20:1	-0.885714	0.0333333	negtive
PE 16:0_18:1	-0.885714	0.0333333	negtive
Cer 18:1;2O/17:0	-0.885714	0.0333333	negtive
Cer 18:1;2O/20:0	-0.885714	0.0333333	negtive
PC 13:0_16:1	-0.885714	0.0333333	negtive
PC 14:0_16:1	-0.885714	0.0333333	negtive
Cer 18:1;2O/18:3	-0.885714	0.0333333	negtive
MGDG 16:0_13:1	-0.885714	0.0333333	negtive
Cer 18:1;2O/17:0	-0.885714	0.0333333	negtive
Cer 18:1;2O/20:0	-0.885714	0.0333333	negtive
PC 14:0_16:1	-0.885714	0.0333333	negtive
PE 16:0_16:1	-0.885714	0.0333333	negtive
MGDG 16:0_13:1	-0.885714	0.0333333	negtive
Cer 18:1;2O/17:0	-0.885714	0.0333333	negtive
Cer 18:1;2O/20:0	-0.885714	0.0333333	negtive
PC 14:0_16:1	-0.885714	0.0333333	negtive
DG 10:0_16:1	-0.885714	0.0333333	negtive
DG 12:0_16:1	-0.885714	0.0333333	negtive
DG 13:0_16:1	-0.885714	0.0333333	negtive
DG 14:0_14:0	-0.885714	0.0333333	negtive
TG 10:0_10:0_18:0	-0.885714	0.0333333	negtive
TG 10:0_14:1_18:1	-0.885714	0.0333333	negtive
TG 10:0_13:0_16:0	-0.885714	0.0333333	negtive
PE 15:1_16:1	-0.885714	0.0333333	negtive
Cer 17:1;2O/20:0	-0.885714	0.0333333	negtive
PC 12:0_16:1	-0.885714	0.0333333	negtive
PC 13:0_13:0	-0.885714	0.0333333	negtive
PC 14:0_17:1	-0.885714	0.0333333	negtive
PC 40:3	-0.885714	0.0333333	negtive
Cer 18:1;2O/18:3	-0.885714	0.0333333	negtive
TG 10:0_13:0_16:0	-0.885714	0.0333333	negtive
PC 13:0_13:0	-0.885714	0.0333333	negtive
PC 14:0_17:1	-0.885714	0.0333333	negtive
Cer 18:1;2O/18:3	-0.885714	0.0333333	negtive
PC 40:3	-0.885714	0.0333333	negtive
PC 40:3	-0.885714	0.0333333	negtive
TG 10:0_13:0_16:0	-0.885714	0.0333333	negtive
PC 13:0_13:0	-0.885714	0.0333333	negtive
PC 14:0_17:1	-0.885714	0.0333333	negtive
MGDG 16:0_13:1	-0.885714	0.0333333	negtive
Cer 18:1;2O/17:0	-0.885714	0.0333333	negtive
Cer 18:1;2O/20:0	-0.885714	0.0333333	negtive
PC 14:0_16:1	-0.885714	0.0333333	negtive
PC 40:3	-0.885714	0.0333333	negtive
PC 40:3	-0.885714	0.0333333	negtive
PE 16:0_16:1	-0.885714	0.0333333	negtive
Cer 18:1;2O/16:0	-0.942857	0.0166667	negtive
PC 13:0_13:0	-0.942857	0.0166667	negtive
PC 13:0_13:0	-0.942857	0.0166667	negtive
TG 10:0_14:1_18:1	-0.942857	0.0166667	negtive
Cer 18:1;2O/20:0	-0.942857	0.0166667	negtive
PC 14:0_16:1	-0.942857	0.0166667	negtive
MGDG 16:0_13:1	-0.942857	0.0166667	negtive
PE 16:0_18:1	-0.942857	0.0166667	negtive
Cer 18:1;2O/17:0	-0.942857	0.0166667	negtive
PC 40:3	-0.942857	0.0166667	negtive
TG 10:0_13:0_16:0	-0.942857	0.0166667	negtive
PC 13:0_13:0	-0.942857	0.0166667	negtive
PC 14:0_17:1	-0.942857	0.0166667	negtive
MGDG 16:0_13:1	-0.942857	0.0166667	negtive
DG 13:0_16:1	-0.942857	0.0166667	negtive
TG 10:0_10:0_18:0	-0.942857	0.0166667	negtive
TG 10:0_14:1_18:1	-0.942857	0.0166667	negtive
Cer 18:1;2O/17:0	-0.942857	0.0166667	negtive
TG 10:0_13:0_16:0	-0.942857	0.0166667	negtive
PC 13:0_13:0	-0.942857	0.0166667	negtive
PC 14:0_17:1	-0.942857	0.0166667	negtive
PC 13:0_13:0	-0.942857	0.0166667	negtive
TG 10:0_14:1_18:1	-0.942857	0.0166667	negtive
MGDG 16:0_13:1	-0.942857	0.0166667	negtive
TG 10:0_14:1_18:1	-0.942857	0.0166667	negtive
Cer 18:1;2O/17:0	-0.942857	0.0166667	negtive
Cer 18:1;2O/20:0	-0.942857	0.0166667	negtive
PC 14:0_16:1	-0.942857	0.0166667	negtive
MGDG 16:0_13:1	-0.942857	0.0166667	negtive
TG 10:0_14:1_18:1	-0.942857	0.0166667	negtive
Cer 18:1;2O/17:0	-0.942857	0.0166667	negtive
Cer 18:1;2O/20:0	-0.942857	0.0166667	negtive
PC 14:0_16:1	-0.942857	0.0166667	negtive
TG 10:0_13:0_16:0	-0.942857	0.0166667	negtive
PC 13:0_13:0	-0.942857	0.0166667	negtive
PC 14:0_17:1	-0.942857	0.0166667	negtive
MGDG 16:0_13:1	-0.942857	0.0166667	negtive
DG 13:0_16:1	-0.942857	0.0166667	negtive
TG 10:0_10:0_18:0	-0.942857	0.0166667	negtive
TG 10:0_14:1_18:1	-0.942857	0.0166667	negtive
Cer 18:1;2O/17:0	-0.942857	0.0166667	negtive
Cer 18:1;2O/18:3	-1	0.00277778	negtive
TG 10:0_13:0_16:0	-1	0.00277778	negtive
PC 14:0_17:1	-1	0.00277778	negtive
TG 10:0_14:1_18:1	-1	0.00277778	negtive
PC 13:0_13:0	-1	0.00277778	negtive
TG 10:0_14:1_18:1	-1	0.00277778	negtive
PC 40:3	-1	0.00277778	negtive
TG 10:0_14:1_18:1	-1	0.00277778	negtive
PC 13:0_13:0	-1	0.00277778	negtive

## Sheet: Table S8
Table S8 Raw data for RT-qPCR
Sample Name	Target Name	CT
D0-1	18S	14.3869
D0-1	18S	14.2743
D0-2	18S	12.8492
D0-2	18S	12.8553
D0-3	18S	12.2143
D0-3	18S	12.0815
D10-1	18S	13.8358
D10-1	18S	13.8491
D10-2	18S	12.9583
D10-2	18S	12.9005
D10-3	18S	14.0714
D10-3	18S	14.0486
D2-1	18S	12.2593
D2-1	18S	12.1897
D2-2	18S	12.1104
D2-2	18S	12.034
D2-3	18S	12.6015
D2-3	18S	12.4752
D4-1	18S	12.5382
D4-1	18S	12.439
D4-2	18S	13.2273
D4-2	18S	13.2465
D4-3	18S	12.9519
D4-3	18S	12.9324
D6-1	18S	12.6524
D6-1	18S	12.7583
D6-2	18S	12.6035
D6-2	18S	12.8339
D6-3	18S	12.6881
D6-3	18S	13.0138
D8-1	18S	12.7538
D8-1	18S	12.743
D8-2	18S	12.483
D8-2	18S	12.5032
D8-3	18S	12.699
D8-3	18S	12.6216
D0-1	Adipoq	36.3755
D0-1	Adipoq	Undetermined
D0-2	Adipoq	35.3178
D0-2	Adipoq	34.6726
D0-3	Adipoq	Undetermined
D0-3	Adipoq	34.4036
D10-1	Adipoq	26.3101
D10-1	Adipoq	26.5636
D10-2	Adipoq	25.8857
D10-2	Adipoq	26.3429
D10-3	Adipoq	26.0657
D10-3	Adipoq	26.171
D2-1	Adipoq	31.6423
D2-1	Adipoq	30.954
D2-2	Adipoq	31.8069
D2-2	Adipoq	32.4243
D2-3	Adipoq	33.8927
D2-3	Adipoq	33.3703
D4-1	Adipoq	25.5102
D4-1	Adipoq	25.472
D4-2	Adipoq	26.1569
D4-2	Adipoq	25.9425
D4-3	Adipoq	25.4237
D4-3	Adipoq	25.3546
D6-1	Adipoq	26.3574
D6-1	Adipoq	26.394
D6-2	Adipoq	26.2164
D6-2	Adipoq	26.2232
D6-3	Adipoq	25.2036
D6-3	Adipoq	25.1536
D8-1	Adipoq	22.295
D8-1	Adipoq	22.8025
D8-2	Adipoq	20.9748
D8-2	Adipoq	21.2051
D8-3	Adipoq	20.8021
D8-3	Adipoq	21.0824
D0-1	B2m	16.8508
D0-1	B2m	16.6664
D0-2	B2m	14.9637
D0-2	B2m	15.1888
D0-3	B2m	15.7122
D0-3	B2m	16.1604
D10-1	B2m	18.3513
D10-1	B2m	18.2732
D10-2	B2m	17.7468
D10-2	B2m	17.683
D10-3	B2m	17.5726
D10-3	B2m	17.5208
D2-1	B2m	16.9533
D2-1	B2m	16.9863
D2-2	B2m	16.5712
D2-2	B2m	16.6305
D2-3	B2m	18.2959
D2-3	B2m	18.2959
D4-1	B2m	19.3595
D4-1	B2m	19.1813
D4-2	B2m	20.2039
D4-2	B2m	20.101
D4-3	B2m	19.3229
D4-3	B2m	19.4493
D6-1	B2m	18.5325
D6-1	B2m	18.4419
D6-2	B2m	18.5444
D6-2	B2m	18.2646
D6-3	B2m	17.7256
D6-3	B2m	17.9654
D8-1	B2m	16.9608
D8-1	B2m	16.9313
D8-2	B2m	16.0255
D8-2	B2m	16.1319
D8-3	B2m	15.911
D8-3	B2m	15.9543
D0-1	β-Actin	16.9429
D0-1	β-Actin	16.941
D0-2	β-Actin	15.5225
D0-2	β-Actin	15.5107
D0-3	β-Actin	16.9852
D0-3	β-Actin	17.0485
D10-1	β-Actin	19.9982
D10-1	β-Actin	20.0322
D10-2	β-Actin	19.1316
D10-2	β-Actin	19.0507
D10-3	β-Actin	19.0974
D10-3	β-Actin	19.232
D2-1	β-Actin	17.1182
D2-1	β-Actin	17.114
D2-2	β-Actin	16.2476
D2-2	β-Actin	16.254
D2-3	β-Actin	18.1943
D2-3	β-Actin	18.3988
D4-1	β-Actin	18.0067
D4-1	β-Actin	17.8999
D4-2	β-Actin	18.6557
D4-2	β-Actin	18.7169
D4-3	β-Actin	18.1926
D4-3	β-Actin	18.0053
D6-1	β-Actin	18.3772
D6-1	β-Actin	18.3784
D6-2	β-Actin	18.1632
D6-2	β-Actin	18.2262
D6-3	β-Actin	17.5946
D6-3	β-Actin	17.5446
D8-1	β-Actin	18.196
D8-1	β-Actin	18.1264
D8-2	β-Actin	17.2908
D8-2	β-Actin	17.2226
D8-3	β-Actin	17.2206
D8-3	β-Actin	17.0459
D0-1	Acsl1	33.6849
D0-1	Acsl1	Undetermined
D0-2	Acsl1	37.697
D0-2	Acsl1	Undetermined
D0-3	Acsl1	32.8216
D0-3	Acsl1	33.5566
D10-1	Acsl1	30.8907
D10-1	Acsl1	30.0997
D10-2	Acsl1	30.0379
D10-2	Acsl1	29.2612
D10-3	Acsl1	29.9994
D10-3	Acsl1	29.7829
D2-1	Acsl1	28.7666
D2-1	Acsl1	28.612
D2-2	Acsl1	29.5552
D2-2	Acsl1	29.2123
D2-3	Acsl1	31.5936
D2-3	Acsl1	31.3219
D4-1	Acsl1	30.5503
D4-1	Acsl1	30.6606
D4-2	Acsl1	31.8206
D4-2	Acsl1	32.393
D4-3	Acsl1	30.6253
D4-3	Acsl1	31.778
D6-1	Acsl1	28.9835
D6-1	Acsl1	29.4276
D6-2	Acsl1	28.76
D6-2	Acsl1	28.5535
D6-3	Acsl1	28.0967
D6-3	Acsl1	28.201
D8-1	Acsl1	28.0613
D8-1	Acsl1	27.9486
D8-2	Acsl1	27.0523
D8-2	Acsl1	26.9624
D8-3	Acsl1	27.0492
D8-3	Acsl1	26.7488
D0-1	Cebpα	30.2425
D0-1	Cebpα	30.0263
D0-2	Cebpα	29.0402
D0-2	Cebpα	28.8172
D0-3	Cebpα	29.8125
D0-3	Cebpα	30.0764
D10-1	Cebpα	30.6062
D10-1	Cebpα	31.0352
D10-2	Cebpα	29.5566
D10-2	Cebpα	30.0077
D10-3	Cebpα	30.274
D10-3	Cebpα	30.2803
D2-1	Cebpα	27.7987
D2-1	Cebpα	27.629
D2-2	Cebpα	28.1047
D2-2	Cebpα	28.148
D2-3	Cebpα	29.9281
D2-3	Cebpα	29.388
D4-1	Cebpα	26.5382
D4-1	Cebpα	26.2959
D4-2	Cebpα	26.8956
D4-2	Cebpα	27.091
D4-3	Cebpα	26.426
D4-3	Cebpα	26.4698
D6-1	Cebpα	27.959
D6-1	Cebpα	28.2201
D6-2	Cebpα	27.6369
D6-2	Cebpα	27.4641
D6-3	Cebpα	26.9478
D6-3	Cebpα	26.9163
D8-1	Cebpα	26.8033
D8-1	Cebpα	26.7816
D8-2	Cebpα	25.4951
D8-2	Cebpα	25.4072
D8-3	Cebpα	25.4951
D8-3	Cebpα	27.2697
D0-1	Dgat1	27.2467
D0-1	Dgat1	27.7784
D0-2	Dgat1	26.1995
D0-2	Dgat1	26.2216
D0-3	Dgat1	26.9059
D0-3	Dgat1	26.8204
D10-1	Dgat1	27.7328
D10-1	Dgat1	27.5816
D10-2	Dgat1	26.9692
D10-2	Dgat1	27.0209
D10-3	Dgat1	27.4681
D10-3	Dgat1	27.4285
D2-1	Dgat1	25.2063
D2-1	Dgat1	24.9712
D2-2	Dgat1	24.7188
D2-2	Dgat1	24.9036
D2-3	Dgat1	26.2415
D2-3	Dgat1	25.8063
D4-1	Dgat1	24.4028
D4-1	Dgat1	24.4098
D4-2	Dgat1	24.2535
D4-2	Dgat1	24.6585
D4-3	Dgat1	24.0428
D4-3	Dgat1	24.2488
D6-1	Dgat1	25.1242
D6-1	Dgat1	24.9852
D6-2	Dgat1	24.7844
D6-2	Dgat1	24.9053
D6-3	Dgat1	24.1181
D6-3	Dgat1	24.2657
D8-1	Dgat1	24.3932
D8-1	Dgat1	24.3331
D8-2	Dgat1	23.3253
D8-2	Dgat1	23.3129
D8-3	Dgat1	23.3781
D8-3	Dgat1	23.3752
D0-1	Dgat2	24.4598
D0-1	Dgat2	24.4175
D0-2	Dgat2	23.8453
D0-2	Dgat2	22.9601
D0-3	Dgat2	23.7724
D0-3	Dgat2	23.7314
D10-1	Dgat2	27.6332
D10-1	Dgat2	27.5724
D10-2	Dgat2	26.7658
D10-2	Dgat2	26.667
D10-3	Dgat2	26.8602
D10-3	Dgat2	26.8097
D2-1	Dgat2	22.1317
D2-1	Dgat2	22.0895
D2-2	Dgat2	22.0115
D2-2	Dgat2	21.6327
D2-3	Dgat2	23.8979
D2-3	Dgat2	23.9405
D4-1	Dgat2	25.7578
D4-1	Dgat2	25.6781
D4-2	Dgat2	26.307
D4-2	Dgat2	26.5461
D4-3	Dgat2	25.9558
D4-3	Dgat2	25.8486
D6-1	Dgat2	25.4992
D6-1	Dgat2	25.395
D6-2	Dgat2	25.8285
D6-2	Dgat2	25.4109
D6-3	Dgat2	24.7535
D6-3	Dgat2	24.468
D8-1	Dgat2	Undetermined
D8-1	Dgat2	24.9463
D8-2	Dgat2	24.3362
D8-2	Dgat2	24.2363
D8-3	Dgat2	24.1638
D8-3	Dgat2	24.2088
D0-1	Fabp4	24.9625
D0-1	Fabp4	24.9516
D0-2	Fabp4	23.6705
D0-2	Fabp4	23.5785
D0-3	Fabp4	24.5869
D0-3	Fabp4	24.5209
D10-1	Fabp4	22.1352
D10-1	Fabp4	22.0868
D10-2	Fabp4	21.3421
D10-2	Fabp4	21.2999
D10-3	Fabp4	20.6997
D10-3	Fabp4	20.6671
D2-1	Fabp4	19.4749
D2-1	Fabp4	19.5092
D2-2	Fabp4	19.8848
D2-2	Fabp4	19.7732
D2-3	Fabp4	21.8527
D2-3	Fabp4	21.9034
D4-1	Fabp4	17.2679
D4-1	Fabp4	17.1945
D4-2	Fabp4	17.6108
D4-2	Fabp4	17.6081
D4-3	Fabp4	17.4086
D4-3	Fabp4	17.4631
D6-1	Fabp4	18.3115
D6-1	Fabp4	18.3243
D6-2	Fabp4	18.1362
D6-2	Fabp4	18.0797
D6-3	Fabp4	17.2394
D6-3	Fabp4	17.4103
D8-1	Fabp4	17.2886
D8-1	Fabp4	17.2221
D8-2	Fabp4	16.3885
D8-2	Fabp4	16.2932
D8-3	Fabp4	16.309
D8-3	Fabp4	16.3962
D0-1	Lpin1	32.249
D0-1	Lpin1	33.5189
D0-2	Lpin1	31.6893
D0-2	Lpin1	31.6951
D0-3	Lpin1	31.0321
D0-3	Lpin1	31.4171
D10-1	Lpin1	30.0692
D10-1	Lpin1	30.3945
D10-2	Lpin1	29.7138
D10-2	Lpin1	29.4973
D10-3	Lpin1	30.6205
D10-3	Lpin1	30.2631
D2-1	Lpin1	29.7552
D2-1	Lpin1	30.0046
D2-2	Lpin1	29.8561
D2-2	Lpin1	29.9953
D2-3	Lpin1	31.5138
D2-3	Lpin1	31.1438
D4-1	Lpin1	29.9167
D4-1	Lpin1	30.2214
D4-2	Lpin1	30.8577
D4-2	Lpin1	30.8023
D4-3	Lpin1	29.9968
D4-3	Lpin1	30.3349
D6-1	Lpin1	30.101
D6-1	Lpin1	29.931
D6-2	Lpin1	29.9344
D6-2	Lpin1	29.5531
D6-3	Lpin1	29.6126
D6-3	Lpin1	29.6501
D8-1	Lpin1	28.6352
D8-1	Lpin1	28.566
D8-2	Lpin1	27.2329
D8-2	Lpin1	27.1956
D8-3	Lpin1	27.7861
D8-3	Lpin1	27.5337
D0-1	Lpl	22.338
D0-1	Lpl	22.498
D0-2	Lpl	21.1106
D0-2	Lpl	21.1916
D0-3	Lpl	21.61
D0-3	Lpl	21.6584
D10-1	Lpl	23.326
D10-1	Lpl	23.3666
D10-2	Lpl	22.735
D10-2	Lpl	22.6899
D10-3	Lpl	23.2292
D10-3	Lpl	23.2371
D2-1	Lpl	21.9298
D2-1	Lpl	21.8134
D2-2	Lpl	21.9321
D2-2	Lpl	21.9311
D2-3	Lpl	23.2911
D2-3	Lpl	23.2062
D4-1	Lpl	23.8993
D4-1	Lpl	23.9281
D4-2	Lpl	24.8601
D4-2	Lpl	24.9064
D4-3	Lpl	23.9385
D4-3	Lpl	23.989
D6-1	Lpl	21.8344
D6-1	Lpl	21.8418
D6-2	Lpl	21.6984
D6-2	Lpl	21.6312
D6-3	Lpl	21.0513
D6-3	Lpl	20.9265
D8-1	Lpl	20.2735
D8-1	Lpl	20.2554
D8-2	Lpl	19.2601
D8-2	Lpl	19.3844
D8-3	Lpl	19.5167
D8-3	Lpl	19.4148
D0-1	Plin1	37.5858
D0-1	Plin1	36.0291
D0-2	Plin1	35.8837
D0-2	Plin1	Undetermined
D0-3	Plin1	35.9244
D0-3	Plin1	35.5299
D10-1	Plin1	28.3885
D10-1	Plin1	28.1357
D10-2	Plin1	27.9582
D10-2	Plin1	28.1913
D10-3	Plin1	28.3429
D10-3	Plin1	28.5177
D2-1	Plin1	29.3221
D2-1	Plin1	29.2467
D2-2	Plin1	29.6562
D2-2	Plin1	29.1775
D2-3	Plin1	31.0418
D2-3	Plin1	31.0112
D4-1	Plin1	27.3217
D4-1	Plin1	27.2095
D4-2	Plin1	28.1632
D4-2	Plin1	28.0647
D4-3	Plin1	27.9224
D4-3	Plin1	27.8737
D6-1	Plin1	27.0961
D6-1	Plin1	27.0707
D6-2	Plin1	27.0013
D6-2	Plin1	27.0509
D6-3	Plin1	26.3934
D6-3	Plin1	26.3304
D8-1	Plin1	25.3671
D8-1	Plin1	25.1647
D8-2	Plin1	25.0488
D8-2	Plin1	24.7334
D8-3	Plin1	25.1823
D8-3	Plin1	24.8859
D0-1	Pnpla2	25.1302
D0-1	Pnpla2	25.0972
D0-2	Pnpla2	24.032
D0-2	Pnpla2	24.0563
D0-3	Pnpla2	24.4754
D0-3	Pnpla2	27.2962
D10-1	Pnpla2	26.1387
D10-1	Pnpla2	26.0049
D10-2	Pnpla2	25.9048
D10-2	Pnpla2	25.5199
D10-3	Pnpla2	26.0898
D10-3	Pnpla2	26.0388
D2-1	Pnpla2	22.9928
D2-1	Pnpla2	23.1394
D2-2	Pnpla2	23.1962
D2-2	Pnpla2	23.3399
D2-3	Pnpla2	24.5891
D2-3	Pnpla2	24.4508
D4-1	Pnpla2	21.7368
D4-1	Pnpla2	21.6719
D4-2	Pnpla2	22.4367
D4-2	Pnpla2	22.3623
D4-3	Pnpla2	21.9022
D4-3	Pnpla2	22.1857
D6-1	Pnpla2	22.8201
D6-1	Pnpla2	22.8335
D6-2	Pnpla2	22.4411
D6-2	Pnpla2	22.4773
D6-3	Pnpla2	21.8574
D6-3	Pnpla2	21.9895
D8-1	Pnpla2	22.1624
D8-1	Pnpla2	22.0507
D8-2	Pnpla2	20.7733
D8-2	Pnpla2	20.7499
D8-3	Pnpla2	20.9306
D8-3	Pnpla2	21.0399
D0-1	PPARγ	27.3615
D0-1	PPARγ	27.2165
D0-2	PPARγ	25.9627
D0-2	PPARγ	26.0543
D0-3	PPARγ	26.5895
D0-3	PPARγ	26.4973
D10-1	PPARγ	25.9386
D10-1	PPARγ	25.8681
D10-2	PPARγ	25.0185
D10-2	PPARγ	25.1825
D10-3	PPARγ	25.7287
D10-3	PPARγ	25.6052
D2-1	PPARγ	25.6264
D2-1	PPARγ	25.5965
D2-2	PPARγ	20.906
D2-2	PPARγ	25.5751
D2-3	PPARγ	27.1072
D2-3	PPARγ	27.2341
D4-1	PPARγ	26.9056
D4-1	PPARγ	26.8334
D4-2	PPARγ	27.571
D4-2	PPARγ	27.6893
D4-3	PPARγ	26.9529
D4-3	PPARγ	27.046
D6-1	PPARγ	25.6925
D6-1	PPARγ	25.6371
D6-2	PPARγ	25.2055
D6-2	PPARγ	25.2536
D6-3	PPARγ	24.4075
D6-3	PPARγ	24.6993
D8-1	PPARγ	23.9434
D8-1	PPARγ	23.884
D8-2	PPARγ	22.8259
D8-2	PPARγ	24.85
D8-3	PPARγ	22.8844
D8-3	PPARγ	22.9457
Raw data for RT-qPCR results of Lipe
Sample Name	Target Name	CT
3T3-d0-1	β-Actin	16.7651
3T3-d0-1	β-Actin	16.8294
3T3-d0-2	β-Actin	15.16
3T3-d0-2	β-Actin	15.4885
3T3-d0-3	β-Actin	16.8989
3T3-d0-3	β-Actin	16.8878
3T3-d0-1	Lipe	29.8804
3T3-d0-1	Lipe	30.1013
3T3-d0-2	Lipe	29.0971
3T3-d0-2	Lipe	29.0447
3T3-d0-3	Lipe	29.0008
3T3-d0-3	Lipe	29.367
3T3-d0-1	B2m	16.8699
3T3-d0-1	B2m	17.0319
3T3-d0-2	B2m	15.7665
3T3-d0-2	B2m	15.6874
3T3-d0-3	B2m	16.1119
3T3-d0-3	B2m	16.0381
3T3-d0-1	18s	14.2998
3T3-d0-1	18s	14.2452
3T3-d0-2	18s	12.8384
3T3-d0-2	18s	12.8882
3T3-d0-3	18s	12.1056
3T3-d0-3	18s	12.1076
3T3-d2-1	β-Actin	17.0308
3T3-d2-1	β-Actin	17.0103
3T3-d2-2	β-Actin	16.5054
3T3-d2-2	β-Actin	16.4215
3T3-d2-3	β-Actin	18.3495
3T3-d2-3	β-Actin	18.4525
3T3-d2-1	Lipe	25.9028
3T3-d2-1	Lipe	25.9232
3T3-d2-2	Lipe	26.2481
3T3-d2-2	Lipe	26.0774
3T3-d2-3	Lipe	27.1232
3T3-d2-3	Lipe	27.0592
3T3-d4-1	β-Actin	17.783
3T3-d4-1	β-Actin	17.9774
3T3-d4-2	β-Actin	18.5751
3T3-d4-2	β-Actin	18.6002
D4-3	β-Actin	18.1297
D4-3	β-Actin	18.0933
3T3-d4-1	Lipe	25.4532
3T3-d4-1	Lipe	25.4968
3T3-d4-2	Lipe	25.6709
3T3-d4-2	Lipe	26.2014
D4-3	Lipe	25.6041
D4-3	Lipe	25.4943
D6-1	β-Actin	18.3753
D6-1	β-Actin	18.5548
D6-2	β-Actin	17.9128
D6-2	β-Actin	17.9399
D6-3	β-Actin	16.9549
D6-3	β-Actin	16.7302
D6-1	Lipe	25.5666
D6-1	Lipe	25.6599
D6-2	Lipe	25.1193
D6-2	Lipe	25.047
D6-3	Lipe	24.1319
D6-3	Lipe	24.1368
D8-1	β-Actin	17.81
D8-1	β-Actin	17.9775
D8-2	β-Actin	17.1029
D8-2	β-Actin	17.2138
D8-3	β-Actin	17.0015
D8-3	β-Actin	17.1625
D8-1	Lipe	24.8588
D8-1	Lipe	24.8256
D8-2	Lipe	23.5216
D8-2	Lipe	23.6596
D8-3	Lipe	24.1829
D8-3	Lipe	24.1721
D10-1	β-Actin	20.098
D10-1	β-Actin	19.8607
D10-2	β-Actin	19.3527
D10-2	β-Actin	19.2818
D10-3	β-Actin	19.4747
D10-3	β-Actin	19.5124
D10-1	Lipe	28.2429
D10-1	Lipe	28.1213
D10-2	Lipe	27.3738
D10-2	Lipe	27.4613
D10-3	Lipe	27.94
D10-3	Lipe	28.3857
3T3-d2-1	B2m	17.0302
3T3-d2-1	B2m	17.1249
3T3-d2-2	B2m	17.022
3T3-d2-2	B2m	17.1865
3T3-d2-3	B2m	18.6208
3T3-d2-3	B2m	18.4833
3T3-d2-1	18s	12.224
3T3-d2-1	18s	12.2753
3T3-d2-2	18s	11.9392
3T3-d2-2	18s	12.0657
3T3-d2-3	18s	12.473
3T3-d2-3	18s	12.6047
3T3-d4-1	B2m	19.4502
3T3-d4-1	B2m	19.316
3T3-d4-2	B2m	20.2518
3T3-d4-2	B2m	20.3003
D4-3	B2m	19.4471
D4-3	B2m	19.5608
3T3-d4-1	18s	12.338
3T3-d4-1	18s	12.5321
3T3-d4-2	18s	13.2798
3T3-d4-2	18s	13.2584
D4-3	18S	13.0063
D4-3	18S	12.9922
D6-1	B2m	18.534
D6-1	B2m	18.3205
D6-2	B2m	17.9236
D6-2	B2m	17.997
D6-3	B2m	17.1359
D6-3	B2m	17.2422
D6-1	18S	12.8971
D6-1	18S	12.7783
D6-2	18S	12.6133
D6-2	18S	12.5079
D6-3	18S	12.2214
D6-3	18S	12.232
D8-1	B2m	16.3466
D8-1	B2m	16.439
D8-2	B2m	15.8911
D8-2	B2m	15.768
D8-3	B2m	15.7076
D8-3	B2m	15.9418
D8-1	18S	12.6241
D8-1	18S	12.5432
D8-2	18S	12.3322
D8-2	18S	12.3154
D8-3	18S	12.8179
D8-3	18S	12.8168
D10-1	B2m	18.0368
D10-1	B2m	18.3579
D10-2	B2m	17.9487
D10-2	B2m	17.8821
D10-3	B2m	18.003
D10-3	B2m	17.8998
D10-1	18S	13.9709
D10-1	18S	13.9688
D10-2	18S	13.0391
D10-2	18S	13.2992
D10-3	18S	14.1897
D10-3	18S	14.1918
